# Supplementary material for: The Burden of Primary Liver Cancer and Underlying Etiologies From 1990 to 2015 at the Global, Regional, and National Level: Results From the Global Burden of Disease Study 2015
Source: PubMed Central journal article supplement (PMC5824275; doi:10.1001/jamaoncol.2017.3055), 2017-10-05
Supplement: jamaoncol-3-1683-s001.pdf [file jamaoncol-3-1683-s001.pdf]

## Supplementary Online Content

Global Burden of Disease Liver Cancer Collaboration. The burden of primary liver cancer and underlying etiologies from 1990 to 2015 at the global, regional, and national level: results from the Global Burden of Disease Study 2015. Published online October 5, 2017. *JAMA Oncology*. doi:10.1001/jamaoncol.2017.3055

**eAppendix.** The burden of primary liver cancer and underlying 2 etiologies from 1990 to 2015 at the global, regional, and national level: 3 results from the Global Burden of Disease Study 2015.

This supplementary material has been provided by the authors to give readers additional information about their work.

- 1 Web Appendix - The burden of primary liver cancer and underlying
- 2 etiologies from 1990 to 2015 at the global, regional, and national level:
- 3 results from the Global Burden of Disease Study 2015

|    |                                                |    |
|----|------------------------------------------------|----|
| 4  | Contents                                       |    |
| 5  | Appendix A - Methods .....                     | 4  |
| 6  | Definition of indicator .....                  | 4  |
| 7  | Data sources.....                              | 4  |
| 8  | Cancer incidence data sources.....             | 4  |
| 9  | Mortality to incidence ratio data sources..... | 4  |
| 10 | Cancer mortality data sources .....            | 4  |
| 11 | Bias of categories of input data .....         | 4  |
| 12 | Data analysis .....                            | 5  |
| 13 | Cancer registry data formatting.....           | 5  |
| 14 | Mortality to incidence ratio estimation.....   | 6  |
| 15 | Cause of death database formatting .....       | 8  |
| 16 | CODEm models .....                             | 8  |
| 17 | CodCorrect .....                               | 8  |
| 18 | Etiology splits .....                          | 8  |
| 19 | Incidence estimation.....                      | 9  |
| 20 | Prevalence and YLD estimation .....            | 9  |
| 21 | YLL and DALY estimation.....                   | 10 |
| 22 | Probability of cancer .....                    | 10 |
| 23 | Comparative risk assessment .....              | 10 |
| 24 | References .....                               | 11 |
| 25 | Tables and Figures.....                        | 13 |
| 26 | See appendix: Definition of indicator .....    | 13 |
| 27 | Appendix B – Additional results.....           | 73 |
| 28 |                                                |    |
| 29 |                                                |    |

30 **Tables**

31 eTable 1: GATHER checklist ..... 13

32 eTable 2: Data-rich countries including number of years with 95% completeness of vital registration

33 system data ..... 15

34 eTable 3: Covariates selected for CODEm for liver cancer and expected direction of covariate ..... 17

35 eTable 4: Results for CODEm model testing ..... 18

36 eTable 5: References for etiology splits by country ..... 18

37 eTable 6: Disability weights including uncertainty intervals ..... 55

38 eTable 7: Socio-demographic Index groupings by geography, based on 2015 values ..... 56

39 eTable 8: Age-standardized incidence rates with 95% uncertainty interval and male to female ratio by

40 region, by sex, 2015 ..... 73

41 eTable 9: Global liver cancer incident cases, age-standardized incidence rate, deaths, age-standardized

42 mortality rate, DALYs, and age-standardized DALYs attributable to each cause group by year and percent

43 change (both sexes) ..... 76

44 eTable 10: Contribution of hepatitis B, C, alcohol and other causes on absolute liver cancer deaths, 2015,

45 both sexes, by location ..... 78

46 eTable 11: Comparison between liver cancer deaths estimates for GBD and Globocan for the year 2012,

47 both sexes combined ..... 83

48 **Figures**

49 eFigure 1: Flowchart, liver cancer mortality estimation ..... 70

50 eFigure 2: Flowchart, liver cancer incidence to DALY estimation ..... 71

51 eFigure 3: Sociodemographic Index quintiles, 2015 ..... 72

52 eFigure 4: Liver cancer ranking by total incidence and mortality based on global level, SDI quintiles,

53 regions, and all countries, both sexes, 2015 ..... 92

54 eFigure 5: Decomposition of changes in liver cancer incident cases 1990 to 2015 by cause group, both

55 sexes ..... 93

56 eFigure 6: Relative changes in age-standardized liver cancer incidence between 1990 and 2015 for both

57 sexes in 195 countries and territories ..... 94

58

## 59 Appendix A - Methods

### 60 Definition of indicator

61 In this publication estimates for liver cancer, for both sexes, for the time from 1990 to 2015 are  
62 presented for 195 countries or territories. All ICD9 and ICD10 codes pertaining to liver cancer (155-155.9  
63 and C22, respectively) are being included in these estimates. Countries and territories reported can be  
64 found in eTable 2.

### 65 Data sources

#### 66 Cancer incidence data sources

67 Cancer incidence was sought from individual cancer registries or aggregated databases of cancer registry  
68 data like “Cancer Incidence In Five Continents (CI5)”,<sup>1-10</sup>, EUREG,<sup>11</sup> or NORDCAN.<sup>12</sup> Data were excluded if  
69 they were not representative of the coverage population (e.g., hospital-based registries), if they did not  
70 cover all malignant neoplasms as defined in ICD9 (140-208) or ICD10 (C00-C96) (e.g. specialty cancer  
71 registry), if they did not include data for both sexes and all age groups, if the data were limited to years  
72 prior to 1980, or if the source did not provide details on the population covered. Preference was given  
73 to registries with national coverage over those with only local coverage, except those from countries  
74 where the GBD study provides subnational estimates. A list of the cancer registries included in our  
75 analysis and the years covered can be found elsewhere.<sup>13</sup> Additional metadata for each source are  
76 available in the online GBD citation tool <http://ghdx.healthdata.org/gbd-2015-data-citations>. For liver  
77 cancer 10,118 site-years were included from vital registration data and 2,419 site-years from cancer  
78 registries.

#### 79 Mortality to incidence ratio data sources

80 Most cancer registries only report cancer incidence. However, if a cancer registry also reported cancer  
81 mortality, mortality data were extracted from the source to be used in the mortality to incidence  
82 estimation. In the case when high-quality mortality data were available but not reported by the registry,  
83 processed (post-redistribution, see below) vital registration mortality data from the cause of death  
84 database were matched to the registry’s incidence data. This was the case for certain registries in the  
85 following countries: Australia, Austria, Belgium, Bulgaria, Denmark, Estonia, Finland, Hungary, Iceland,  
86 Ireland, New Zealand, Norway, South Korea, and Switzerland.

#### 87 Cancer mortality data sources

88 A detailed description of the data sources and processing steps for the cause of death database can be  
89 found in the appendix to the paper “Global, regional, and national life expectancy, all-cause and cause-  
90 specific mortality for 249 causes of death, 1980–2015: a systematic analysis for the Global Burden of  
91 Disease Study 2015.”<sup>14</sup>

#### 92 Bias of categories of input data

93 Bias of the input data included for the COD database is described elsewhere.<sup>14</sup> Cancer registry data can  
94 be biased in multiple ways. A high proportion of ill-defined cancer cases in the registry data requires  
95 redistribution of these cases to other cancers, which introduces a potential for bias. Changes between  
96 coding systems can lead to artificial differences in disease estimates; however, we adjust for this bias by  
97 mapping the different coding systems to the GBD causes. Underreporting of cancers that require  
98 advanced diagnostic techniques (e.g., leukemia and brain, pancreatic, and liver cancers) can be an issue  
99 in cancer registries from low-income countries. On the other hand, misclassification of metastatic sites

100 as primary cancer can lead to overestimation of cancer sites that are common sites for metastases like  
101 brain or liver. Since many cancer registries are located in urban areas, the representativeness of the  
102 registry for the general population can also be problematic. The accuracy of mortality data reported in  
103 cancer registries usually depends on the quality of the vital registration system. If the vital registration  
104 system is incomplete or of poor quality, the mortality to incidence ratio can be biased to lower ratios.

## 105 Data analysis

106 Flowcharts describing the conceptual overview of the data processing are available in eFigure 1 and  
107 eFigure 2.

## 108 Cancer registry data formatting

109 Cancer registry data went through multiple processing steps before integration with the COD database.  
110 First, the original data were transformed into standardized files, which included standardization of  
111 format, categorization, and registry names (#1 in eFigure 1).

112 Second, some cancer registries report individual codes as well as aggregated totals (e.g., C18, C19, and  
113 C20 are reported individually, but the aggregated group of C18-C20 (colorectal cancer) is also reported  
114 in the registry data). The data processing step “subtotal recalculation” (#2 in flowchart) verified these  
115 totals and subtracted the values of any individual codes from the aggregates.

116 In the third step (#3 in the flowchart), cancer registry incidence data and cancer registry mortality data  
117 were mapped to GBD causes. A different map is used for incidence and for mortality data. One example  
118 is ICD10 D13.4 (Benign neoplasm of liver) and ICD9 211.5 (Benign neoplasm of liver and biliary  
119 passages), which are mapped to “liver cancer” in vital registration system data but dropped from any  
120 incidence data. The assumption is that deaths assigned to benign neoplasms are miscoded and should  
121 correctly be assigned to the invasive cancer.

122 In the fourth data processing step (#4 in the flowchart) cancer registry data were standardized to the  
123 GBD age groups. Age-specific incidence rates were generated using CI5, SEER, and NORDCAN data, while  
124 age-specific mortality rates were generated from the CoD data.<sup>14</sup> Age-specific weights were then  
125 generated by applying the age-specific rates to a given registry population that required age-splitting to  
126 produce the expected number of cases/deaths for that registry by age. The expected number of  
127 cases/deaths for each sex, age, and cancer were then normalized to 1, creating final, age-specific  
128 proportions. These proportions were then applied to the total number of cases/deaths by sex and  
129 cancer to get the age-specific number of cases/deaths.

130 In the rare case that the cancer registry only contained data for both sexes combined, the age-specific  
131 cases/deaths were split and reassigned to separate sexes using the same weights that are used for the  
132 age-splitting process. Starting from the expected number of deaths, proportions were generated by sex  
133 for each age (e.g., if for ages 15-19 years old there are six expected deaths for males and four expected  
134 deaths for females, then 60% of the combined-sex deaths for ages 15-19 years would be assigned to  
135 males and the remaining 40% would be assigned to females).

136 In the fifth step (#5 in the flowchart) data for cause entries that are aggregates of GBD causes were  
137 redistributed. Examples of these aggregated causes include some registries reporting ICD10 codes C00-  
138 C14 together as, “lip, oral cavity, and pharyngeal cancer.” These groups were broken down into  
139 subcauses that could be mapped to single GBD causes. In this example, those include lip and oral cavity  
140 cancer (C00-C08), nasopharyngeal cancer (C11), cancer of other parts of the pharynx (C09-C10, C12-  
141 C13), and “Malignant neoplasm of other and ill-defined sites in the lip, oral cavity and pharynx” (C14). To  
142 redistribute the data, weights were created using the same method employed in age-sex splitting (see

143 step four above). For the undefined code (C14 in the example) an “average all-cancer” weight was used,  
 144 which was generated by adding all cases from SEER/NORDCAN/CI5 and dividing those by the combined  
 145 population. Then, proportions were generated by subcause for each aggregate cause as in the sex-  
 146 splitting example above (see step four). The total number of cases from the aggregated group (C00-C14)  
 147 was recalculated for each subgroup and the undefined code (C14). C14 was then redistributed as a  
 148 “garbage code” in step six. Distinct proportions were used for C46 (Kaposi sarcoma). C46 entries were  
 149 redistributed as “other cancer” and HIV.

150 In the sixth step (#6 in the flowchart) unspecified code (“garbage code”) was redistributed.  
 151 Redistribution of cancer registry incidence and mortality data mirrored the process of the redistribution  
 152 used in the cause of death database and has not changed compared to GBD 2013.<sup>14</sup>

153 In the seventh step (#7 in the flowchart) duplicate or redundant sources were removed from the  
 154 processed cancer registry dataset. Duplicate sources were present if, for example, the cancer registry  
 155 was part of the CI5 dataset but we also had data from the registry directly. Redundancies occurred and  
 156 were removed as described in “Inclusion and Exclusion Criteria,” where more detailed data were  
 157 available, or when national registry data could replace regionally representative data. From here, two  
 158 parallel selection processes were run to generate input data for the MI models and to generate  
 159 incidence for final mortality estimation. Higher priority was given to registry data from the most  
 160 standardized source when creating the final incidence input (generally CI5 data); whereas preference  
 161 was given to registry data from sources with matching mortality and incidence for the MI model input.

## 162 Mortality to incidence ratio estimation

163 In the eighth step (#8 in the flowchart) the processed liver cancer incidence and mortality data from  
 164 cancer registries were matched by cancer, age, sex, year, and location to generate MI ratios. Because  
 165 some cancer registries do not report mortality data – even though high-quality vital registration system  
 166 data are available for the registry’s coverage area –processed vital registration mortality data from the  
 167 CoD database were matched to the registry’s incidence data for some countries. This was the case for  
 168 certain registries in the following countries: Australia, Austria, Belgium, Bulgaria, Denmark, Estonia,  
 169 Finland, Hungary, Iceland, Ireland, New Zealand, Norway, South Korea, and Switzerland.

170 The ninth step involved creating and selecting the MI models. Multiple logit random effect models were  
 171 created. All models were run separately for liver cancer, and the best model was selected from the  
 172 following list.

- 173 1.  $\text{logit}(MI\ ratio_{c,a,s,t}) = \alpha + \beta_1SDI_{c,t} + \sum_a^A \beta_2I_a + \beta_3I_s + \theta_c + \epsilon_{c,a,s,t}$
- 174 2.  $\text{logit}(MI\ ratio_{c,a,s,t}) = \alpha + \beta_1SDI_{c,t} + \sum_a^A \beta_2I_a + \beta_3I_s + \beta_4t + \theta_c + \epsilon_{c,a,s,t}$
- 175 3.  $\text{logit}(MI\ ratio_{c,a,s,t}) = \alpha + \beta_1SDI_{c,t} + \sum_a^A \beta_2I_a + \beta_3I_s + \beta_4DS + \theta_c + \epsilon_{c,a,s,t}$
- 176 4.  $\text{logit}(MI\ ratio_{c,a,s,t}) = \alpha + \beta_1SDI_{c,t} + \sum_a^A \beta_2I_a + \beta_3I_s + \beta_4DS + \beta_5t + \theta_c + \epsilon_{c,a,s,t}$
- 177 5.  $\text{logit}(MI\ ratio_{c,a,s,t}) = \alpha + \beta_1SDI_{c,t} + \sum_a^A \beta_2I_a + \beta_3I_s + \theta_c + \lambda_{SR}(SDS_{c,t}) + \beta_4t + \epsilon_{c,a,s,t}$
- 178 6.  $\text{logit}(MI\ ratio_{c,a,s,t}) = \alpha + \beta_1SDI_{c,t} + \sum_a^A \beta_2I_a + \beta_3I_s + \theta_c + \lambda_{SR}(SDS_{c,t}) + \epsilon_{c,a,s,t}$
- 179 7.  $\text{logit}(MI\ ratio_{c,a,s,t}) = \alpha + \beta_1SDI_{c,t} + \sum_a^A \beta_2I_a + \beta_3I_s + \theta_c + \lambda_{SR}(SDS_{c,t}) + \beta_4DS + \epsilon_{c,a,s,t}$
- 180 8.  $\text{logit}(MI\ ratio_{c,a,s,t}) = \alpha + \beta_1SDI_{c,t} + \sum_a^A \beta_2I_a + \beta_3I_s + \theta_c + \lambda_{SR}(SDS_{c,t}) + \beta_4t + \beta_5DS +$   
 181  $\epsilon_{c,a,s,t}$

183 c: country, a: age group, t: time (years); s: sex

184 SDI: Socio-demographic Index (index using log lag dependent income per capita (LDI), average  
 185 educational attainment in the population over age 15, and total fertility rate (TFR))

186 I: indicator variable  
 187 DS: binary variable for development status  
 188  $\theta_c$ : random effect by country (intercept)  
 189  $\lambda_{SR}(SDI_{c,t})$ : random effect modifier between SDI and superregion (slope)  
 190  $\epsilon_{c,a,s,t}$ : error term

191  
 192 All models were tested at multiple stages before creating the final model output. Models were initiated  
 193 with SDI (Socio-demographic Index) as covariate and first tested using the complete input dataset.<sup>14</sup> If  
 194 after that initial test the SDI covariate's coefficient was negative (as expected), the next step was to  
 195 outlier any data point for which the residual from the prediction was greater than three times the MAD  
 196 from the mean residual. Next, data were marked as outliers due to a random effect criterion: if the  
 197 country-level random effect for a developing country was lower than the random effect for the USA, all  
 198 data points for that country were marked as outliers. The rationale of choosing the US was that the MI  
 199 ratio is expected to be lower in the US compared to a developing country. This process was run  
 200 iteratively until all developing countries had country-level random effects greater than that of the USA.  
 201 All data points marked outliers were dropped from the final dataset, and that dataset was used to  
 202 create the final model predictions.

203 If the SDI coefficient was found to be positive (unexpected) after the initial SDI test, it was assumed to  
 204 indicate an excess of unrealistic data in the input dataset. To remove these unrealistic data, SDI was  
 205 temporarily removed from the model formula. The model proceeded as above without SDI until all  
 206 unrealistic data points were removed and the SDI coefficient was found to be negative. Unrealistic data  
 207 were marked as outliers using the same residual MAD and random effect methodology described above.  
 208 Once SDI was established as negative (expected) the model proceeded as usual.

209 To select the best model formula, the initial model results were tested by comparing mean MI  
 210 predictions and the mean root-mean-squared error (RMSE) values of 10 random samples of 80%/20%  
 211 splits from the input dataset. Mean MI predictions were compared between developing and developed  
 212 countries. Models were eliminated if the mean MI for developed countries was higher than the mean MI  
 213 ratio for developing countries. For RMSE testing, the dataset was split into an 80% dataset for model  
 214 development and a 20% dataset for model testing. The process was repeated 10 times. The best model  
 215 for liver cancer was selected based on the lowest mean out-of-sample RMSE from those models  
 216 remaining after checking the mean MI:

$$\text{logit}(MI\ ratio_{c,a,s,t}) = \alpha + \beta_1 SDI_{c,t} + \sum_a^A \beta_2 I_a + \beta_3 I_s + \beta_4 DS + \beta_5 t + \theta_c + \epsilon_{c,a,s,t}$$

217  
 218 Once the best models were selected, data points were manually outliered based on the results of the  
 219 first run of the model algorithm. Data points were outliered if they clearly influenced the model in an  
 220 unrealistic way. For example, a data point was marked as an outlier if it created a single-year, single-age-  
 221 group spike in model predictions. This was mainly the case in countries with a small number of cases or  
 222 deaths, or in age groups with small numbers of cases or deaths. Manual outliers were removed from the  
 223 input dataset prior to initiating the second run of the model algorithm.

224 After best models were selected, all final outliers were dropped from the data input, and final linear  
 225 predictions were created; the final linear predictions and residuals were used as input for space-time  
 226 smoothing. Space-time smoothing is a spatiotemporal regression to smooth residuals over space, time,  
 227 and age.<sup>15</sup> The weighted residuals were added to the linear model predictions and used as priors for the



228 third stage, a Gaussian process regression (GPR) implementing a Matern covariance function.<sup>16,17</sup> GPR is  
229 a nonparametric technique for interpolating non-linear trends that has been used extensively in the  
230 estimation of time series data. Final MI ratio predictions with 95% uncertainty intervals were obtained  
231 by back-transforming 1,000 draws from the posterior distribution.

232 Step 9 has undergone a revision compared to GBD 2010 and GBD 2013. Whereas in GBD 2010 and GBD  
233 2013 only one model was used to predict all MI ratios, for GBD 2015 we generated multiple models and  
234 chose a best model based on out-of-sample validation. Another major difference is that LDI (lagged  
235 distributed income) was used as a covariate, which was replaced by SDI (Socio-demographic Index) for  
236 GBD 2015.

237 Final MI ratios were matched with the cancer registry incidence dataset in the ninth step (#10 in the  
238 flowchart) to generate mortality estimates (Incidence \* modeled Mortality/Incidence = Incidence-based  
239 mortality estimates). Only the mean of estimated MI ratios was used to transform the incidence data to  
240 mortality estimates due to the current inability in the COD database to incorporate uncertainty other  
241 than sample size and representativeness. This leads to an underestimation of the uncertainty for the  
242 incidence-based mortality estimates from cancer registries. The final mortality estimates were then  
243 added to the COD database (#11 in the flowchart).

#### 244 [Cause of death database formatting](#)

245 Formatting of data sources for the cause of death database has been described in detail elsewhere.<sup>14</sup>

#### 246 [CODEm models](#)

247 Mortality estimates for liver cancer were generated using CODEm. Methods describing the CODEm  
248 approach have been described elsewhere.<sup>14,18</sup> In brief, the CODEm modeling approach is based on the  
249 principles that all types of available data should be used even if data quality varies; that individual  
250 models but also ensemble models should be tested for their predictive validity; and that the best model  
251 or sets of models should be chosen based on the out-of-sample predictive validity. Models were run  
252 separately for countries with extensive and complete vital registration data and countries with less VR  
253 data to prevent an inflation in the uncertainty around the estimates in “data-rich” countries. eTable 4  
254 includes the list of data-rich countries. Covariates were selected based on a possible predictive  
255 relationship between the covariate and the specific cancer mortality. Level 1 covariates have a proven  
256 strong relationship with the outcome such as etiological or biological roles. Level 2 covariates have a  
257 strong relationship but not a direct biological link. Covariates, which are more distal in the causal chain  
258 or are mediated through Level 1 or 2 covariates are categorized as Level 3.<sup>18</sup> Differences in covariate  
259 selection between GBD 2013 and GBD 2015 can be found in eTable 3. Results for CODEm model testing  
260 can be found in eTable 5.

#### 261 [CodCorrect](#)

262 CODEm models estimate the individual cause-level mortality without taking into account the all-cause  
263 mortality. To ensure that all single causes add up to the all-cause mortality and that all child-causes add  
264 up to the parent cause, an algorithm called “CodCorrect” is used. Details regarding the algorithm can be  
265 found elsewhere.<sup>14</sup>

#### 266 [Etiology splits](#)

267 To find the proportion of liver cancer cases due to the four etiology groups included in GBD (1. Liver  
268 cancer due to hepatitis B, 2. Liver cancer due to hepatitis C, 3. Liver cancer due to alcohol, 4. Liver cancer

269 due to other causes), a systematic literature search was performed in PubMed. Results can be found in  
 270 eTable 6. Studies were included if the study population was representative of liver cancer patients for  
 271 the respective location. For each study the proportions of liver cancer due to the three specific risk  
 272 factors were calculated. Remaining risk factors were included under a combined “other” group.  
 273 Cryptogenic cases were excluded. If multiple risk factors were reported for an individual patient these  
 274 were apportioned proportionally to the individual risk factors. The proportion data found through the  
 275 systematic literature review were used as input for four separate DisMod-MR 2.1 models to determine  
 276 the proportion of liver cancers due to the four subgroups for all locations, both sexes, all age groups. A  
 277 study covariate was used for publications that only assessed liver cancer in a cirrhotic population. The  
 278 reference or “gold-standard” that was used for crosswalking was the compilation of all studies that  
 279 assessed the etiology of liver cancer in a general population. For liver cancer due to hepatitis C and  
 280 hepatitis B, a prior value of 0 was set between age 0 and 0.01. For liver cancer due to alcohol a prior  
 281 value of 0 was set for ages 0 to 5 years. For liver cancer due to hepatitis C, hepatitis C (IgG)  
 282 seroprevalence was used as a covariate as well as a covariate for alcohol (liters per capita) and hepatitis  
 283 B prevalence (HBsAg seroprevalence), forcing a negative relationship between the alcohol and hepatitis  
 284 B covariate and the outcome of liver cancer due to hepatitis C proportion. For liver cancer due to  
 285 hepatitis B, seroprevalence of HBsAg was used as a covariate as well as a covariate for alcohol and  
 286 hepatitis C IgG seroprevalence, forcing a negative relationship between the alcohol and hepatitis C  
 287 covariate and the outcome of liver cancer due to hepatitis B proportion. For liver cancer due to alcohol,  
 288 alcohol (liters per capita) was used as a covariate as well as a covariate for hepatitis B and hepatitis C  
 289 seroprevalence, forcing a negative relationship between the hepatitis B and hepatitis C covariates and  
 290 the outcome of liver cancer due to alcohol proportion. All covariates used were modeled  
 291 independently.<sup>19</sup>

## 292 Incidence estimation

293 GBD cancer incidence estimates were generated by dividing final liver cancer mortality estimates (after  
 294 CodCorrect adjustment and etiology splits) by the liver cancer MI ratios (step 1 in eFigure 2). To  
 295 propagate uncertainty from the MI ratios and the mortality estimates to incidence, this process was  
 296 done at the 1,000 draw level. It was assumed that uncertainty in the MI ratio is independent of  
 297 uncertainty in the estimated age-specific death rates.

## 298 Prevalence and YLD estimation

299 Prevalence is estimated as 10-year prevalence for liver cancer as in GBD 2013.<sup>20</sup> To estimate cancer  
 300 prevalence, relative cancer survival was estimated by scaling cancer-specific survival between a “best  
 301 case” and “worst case” survival. The methods and input data used to generate the best and worst case  
 302 survival as well as to scale countries between these boundaries remained the same as for the GBD 2013  
 303 study (steps 2, 3, and 5 in the flowchart).<sup>20</sup> To transform relative to absolute survival (adjusting for  
 304 background mortality) GBD 2015 lifetables were used (steps 6 and 7 in the flowchart).<sup>14</sup> The access to  
 305 cancer care variable to scale countries between the best and worst case survival was estimated using  
 306 the same method as for GBD 2013 (step 4 in the flowchart).<sup>20</sup>

$$Access\ to\ care = 1 - \frac{Age\ standardized\ MI\ ratio_{cys} - Age\ standardized\ MI\ ratio_{min}}{Age\ standardized\ MI\ ratio_{max} - Age\ standardized\ MI\ ratio_{min}}$$

307 c=country; y=year; s=sex; age-standardized MI ratio<sub>min</sub>=lowest MI ratio for all countries and years; age  
 308 standardized MI ratio<sub>max</sub>=highest MI ratio for all countries and years

309 Duration of the treatment phases (1. Diagnosis and primary therapy; 2. Controlled phase; 3. Metastatic  
310 phase; 4. Terminal phase) remained the same as for GBD 2013 with 4 months assumed for the diagnosis  
311 and treatment phase, 2.51 months assumed for the metastatic phase<sup>21</sup> and 1 month for the terminal  
312 phase. Total prevalence time was divided into phases 1, 3, and 4, for the population that died within 10  
313 years, and the remaining prevalence was attributed to the controlled phase. For the population that  
314 survived beyond 10 years, prevalence person-time was attributed to phase 1 and phase 2. Years lived  
315 with disability (YLDs) were calculated by multiplying each phase by the respective disability weight  
316 (eTable 7). To generate the total YLDs for each cancer, the YLDs for each cancer sequela were added  
317 (step 13 in eFigure 2). The standard GBD 2013 disability weights were used, which were derived from an  
318 open-access internet survey and household surveys in Bangladesh, Hungary, Indonesia, Italy, the  
319 Netherlands, Peru, Sweden, Tanzania, and the United States. In the surveys, respondents were asked to  
320 determine the healthier individual between two choices with different, randomly selected health states  
321 based on a lay description. These surveys were used to generate 235 health states reflecting all GBD  
322 sequelae.<sup>22,23</sup>

### 323 YLL and DALY estimation

324 The number of years of life lost (YLLs) due to cancer deaths was calculated by multiplying the number of  
325 deaths in each age group by the normative standard life expectancy for the corresponding age group.  
326 For GBD 2015 the normative standard life expectancy at birth was 86.59 years, which is based on the  
327 lowest observed death rates for each five-year age group in populations greater than 5 million.

### 328 Probability of cancer

329 The cumulative probability of developing cancer for certain age groups and an approximated lifetime  
330 risk for all cancer groups (age 0 to 79) as well as the odds of developing cancer for 2015 were calculated.  
331 The method used does not take into account competing risks of death. The cancer risk is approximated  
332 using the following formula<sup>24</sup>:

$$333 \text{Cumulative risk} = 1 - e^{-\text{cumulative rate}}$$

### 334 Comparative risk assessment

335 As part of the GBD study, risks leading to poor health outcomes are assessed using a comparative risk  
336 assessment (CRA) approach.<sup>25</sup> This approach differs from the etiological attribution of liver cancer  
337 presented in this study. Categories of risks currently included in the CRA are behavioral, environmental  
338 and occupational, and metabolic risks. For these groups, risk-outcome pairs are defined based on  
339 evidence of a causal relationship. For liver cancer the risks included in the CRA were smoking, alcohol  
340 use, and high body mass index. For liver cancer due to hepatitis B and C, drug use was included as an  
341 additional risk-outcome pair. Pathogens like hepatitis B and C have not yet been included in the CRA.  
342 The population attributable fraction (PAF) was estimated in the CRA by using the relative risk of an  
343 exposure, the prevalence of the risk in a population, and the theoretical minimum risk level. At the  
344 global level the PAF of alcohol use on liver cancer deaths due to alcohol use was 100%, meaning that all  
345 liver cancer deaths due to alcohol could have been avoided if there were 100% abstinence from alcohol  
346 at the population level. The risk factor attribution for liver cancer deaths due to hepatitis C in 2015 was  
347 55.8% (95% UI, 46.7%–64.1%). For liver cancer due to hepatitis B it was 23.7% (95% UI, 13.8%–34.9%).  
348 For liver cancer due to other causes it was 21.5% (95% UI, 12.5%–31.0%). Further results for the  
349 attributable burden can be found elsewhere.<sup>25</sup>

350 **References**

- 351 1. Doll R, Payne P, Waterhouse J. *Cancer Incidence in Five Continents I*. Geneva: Union Internationale  
352 Contre le Cancer; 1966.
- 353 2. Doll R, Muir C, Waterhouse J. *Cancer Incidence in Five Continents II*. Geneva: Union Internationale  
354 Contre le Cancer, Geneva; 1970.
- 355 3. Waterhouse J, Muir C, Correa P, Powell J. *Cancer Incidence in Five Continents III*. Lyon: IARC; 1976.
- 356 4. Waterhouse J, Muir C, Shanmugaratnam K, Powell J. *Cancer Incidence in Five Continents IV*. Lyon:  
357 IARC; 1982.
- 358 5. Muir C, Mack T, Powell J, Whelan S. *Cancer Incidence in Five Continents V*. Lyon: IARC; 1987.
- 359 6. Parkin D, Muir C, Whelan S, Gao Y, Ferlay J, Powell J. *Cancer Incidence in Five Continents VI*. Lyon:  
360 IARC; 1992.
- 361 7. Parkin D, Whelan S, Ferlay J, Raymond L, Young J. *Cancer Incidence in Five Continents VII*. Lyon:  
362 IARC; 1997.
- 363 8. Parkin D, Whelan S, Ferlay J, Teppo L, Thomas D. *Cancer Incidence in Five Continents VIII*. Lyon:  
364 IARC; 2002.
- 365 9. Curado M, Edwards B, Shin H, et al. *Cancer Incidence in Five Continents IX*. Lyon: IARC; 2007.  
366 <http://www.iarc.fr/en/publications/pdfs-online/epi/sp160/CI5vol9-A.pdf>.
- 367 10. Forman D, Bray F, Brewster D, et al. *Cancer Incidence in Five Continents X*. <http://ci5.iarc.fr>.  
368 Published 2013.
- 369 11. Steliarova-Foucher E, O'Callaghan M, Ferlay J, Masuyer E, Forman D, Comber H, Bray F. European  
370 Cancer Observatory: Cancer Incidence, Mortality, Prevalence and Survival in Europe. International  
371 Agency for Research on Cancer. <http://eco.iarc.fr>. Accessed August 10, 2016.
- 372 12. Engholm G, Ferlay J, Christensen N, et al. NORDCAN--a Nordic tool for cancer information,  
373 planning, quality control and research. *Acta Oncol*. 2010;49(5):725-736.  
374 doi:10.3109/02841861003782017.
- 375 13. GBD Mortality and Causes of Death Collaborators. Global, regional, and national life expectancy,  
376 all-cause and cause specific mortality for 249 causes of death, 1980–2015: a systematic analysis for  
377 the Global Burden of Disease Study 2015. *The Lancet*. August 2016.
- 378 14. Wang H, Dwyer-Lindgren L, Lofgren KT, et al. Age-specific and sex-specific mortality in 187  
379 countries, 1970–2010: a systematic analysis for the Global Burden of Disease Study 2010. *The*  
380 *Lancet*. 2012;380(9859):2071-2094. doi:10.1016/S0140-6736(12)61719-X.
- 381 15. Murray CJ, Rosenfeld LC, Lim SS, et al. Global malaria mortality between 1980 and 2010: a  
382 systematic analysis. *The Lancet*. 2012;379(9814):413-431. doi:10.1016/S0140-6736(12)60034-8.

- 383 16. Rasmussen CE, Williams CKI. *Gaussian Processes for Machine Learning*. Cambridge, Mass: MIT  
384 Press; 2006.
- 385 17. Foreman KJ, Lozano R, Lopez AD, Murray CJ. Modeling causes of death: an integrated approach  
386 using CODEm. *Popul Health Metr*. 2012;10(1):1. doi:10.1186/1478-7954-10-1.
- 387 18. Stanaway JD, Flaxman AD, Naghavi M, et al. The global burden of viral hepatitis from 1990 to 2013:  
388 findings from the Global Burden of Disease Study 2013. *The Lancet*. July 2016. doi:10.1016/S0140-  
389 6736(16)30579-7.
- 390 19. Fitzmaurice C, Dicker D, Pain A, et al. The Global Burden of Cancer 2013. *JAMA Oncol*. May 2015.  
391 doi:10.1001/jamaoncol.2015.0735.
- 392 20. *Surveillance, Epidemiology, and End Results (SEER) Program (Www.seer.cancer.gov) SEER\*Stat*  
393 *Database: Incidence - SEER 18 Regs Research Data + Hurricane Katrina Impacted Louisiana Cases,*  
394 *Nov 2012 Sub (1973-2010 Varying) - Linked To County Attributes - Total U.S., 1969-2011 Counties,*  
395 *National Cancer Institute, DCCPS, Surveillance Research Program, Surveillance Systems Branch,*  
396 *Released April 2013, Based on the November 2012 Submission.*
- 397 21. Haagsma JA, Maertens de Noordhout C, Polinder S, et al. Assessing disability weights based on the  
398 responses of 30,660 people from four European countries. *Popul Health Metr*. 2015;13(1).  
399 doi:10.1186/s12963-015-0042-4.
- 400 22. Salomon JA, Vos T, Hogan DR, et al. Common values in assessing health outcomes from disease  
401 and injury: disability weights measurement study for the Global Burden of Disease Study 2010. *The*  
402 *Lancet*. 2012;380(9859):2129-2143. doi:10.1016/S0140-6736(12)61680-8.
- 403 23. Esteve J, Benhamou E, Raymond L. *Descriptive Epidemiology*. Vol VI. IARC Scientific Publications  
404 No.128. Lyon, France: IARC Publications; 1994.
- 405 24. Global, regional, and national comparative risk assessment of 79 behavioural, environmental and  
406 occupational, and metabolic risks or clusters of risks, 1990–2015: a systematic analysis for the  
407 Global Burden of Disease Study 2015. *The Lancet*. 2016;388(10053):1659-1724.  
408 doi:10.1016/S0140-6736(16)31679-8.
- 409 25. Global Burden of Disease Cancer Collaboration, Fitzmaurice C, Allen C, et al. Global, Regional, and  
410 National Cancer Incidence, Mortality, Years of Life Lost, Years Lived With Disability, and Disability-  
411 Adjusted Life-years for 32 Cancer Groups, 1990 to 2015: A Systematic Analysis for the Global  
412 Burden of Disease Study. *JAMA Oncol*. December 2016. doi:10.1001/jamaoncol.2016.5688.

413

414

| <b>Objectives and funding</b>                                                                                                                                                                                                                                                                                                                                                               | <b>Reported in the manuscript/appendix</b>                                                                                                    |
|---------------------------------------------------------------------------------------------------------------------------------------------------------------------------------------------------------------------------------------------------------------------------------------------------------------------------------------------------------------------------------------------|-----------------------------------------------------------------------------------------------------------------------------------------------|
| 1 Define the indicator(s), populations (including age, sex, and geographic entities), and time period(s) for which estimates were made.                                                                                                                                                                                                                                                     | See appendix: Definition of indicator                                                                                                         |
| 2 List the funding sources for the work.                                                                                                                                                                                                                                                                                                                                                    | Bill & Melinda Gates Foundation                                                                                                               |
| <b>Data Inputs</b>                                                                                                                                                                                                                                                                                                                                                                          |                                                                                                                                               |
| <b>For all data inputs from multiple sources that are synthesized as part of the study:</b>                                                                                                                                                                                                                                                                                                 |                                                                                                                                               |
| 3 Describe how the data were identified and how the data were accessed.                                                                                                                                                                                                                                                                                                                     | See appendix: "Data sources"                                                                                                                  |
| 4 Specify the inclusion and exclusion criteria. Identify all ad-hoc exclusions.                                                                                                                                                                                                                                                                                                             | See appendix: "Data sources"                                                                                                                  |
| 5 Provide information about all included data sources and their main characteristics. For each data source used, report reference information or contact name/institution, population represented, data collection method, year(s) of data collection, sex and age range, diagnostic criteria or measurement method, and sample size, as relevant.                                          | <a href="http://internal-ghdx.healthdata.org/gbd-2015/data-input-sources">http://internal-ghdx.healthdata.org/gbd-2015/data-input-sources</a> |
| 6 Identify and describe any categories of input data that have potentially important biases (e.g., based on characteristics listed in item 5).                                                                                                                                                                                                                                              | See appendix: "Bias of categories of input data"                                                                                              |
| <b>For data inputs that contribute to the analysis but were not synthesized as part of the study:</b>                                                                                                                                                                                                                                                                                       |                                                                                                                                               |
| 7 Describe and give sources for any other data inputs.                                                                                                                                                                                                                                                                                                                                      | <a href="http://internal-ghdx.healthdata.org/gbd-2015/data-input-sources">http://internal-ghdx.healthdata.org/gbd-2015/data-input-sources</a> |
| <b>For all data inputs:</b>                                                                                                                                                                                                                                                                                                                                                                 |                                                                                                                                               |
| 8 Provide all data inputs in a file format from which data can be efficiently extracted (e.g., a spreadsheet rather than a PDF), including all relevant meta-data listed in item 5. For any data inputs that cannot be shared because of ethical or legal reasons, such as third-party ownership, provide a contact name or the name of the institution that retains the right to the data. | <a href="http://internal-ghdx.healthdata.org/gbd-2015/data-input-sources">http://internal-ghdx.healthdata.org/gbd-2015/data-input-sources</a> |
| <b>DATA ANALYSIS</b>                                                                                                                                                                                                                                                                                                                                                                        |                                                                                                                                               |
| 9 Provide a conceptual overview of the data analysis method. A diagram may be helpful.                                                                                                                                                                                                                                                                                                      | See eFigure 1: Flowchart, liver cancer mortality estimation<br>See eFigure 2: Flowchart, liver cancer incidence to DALY estimation            |
| 10 Provide a detailed description of all steps of the analysis, including mathematical formulae. This description should cover, as relevant, data cleaning, data pre-processing, data adjustments and weighting of data sources, and mathematical or statistical model(s).                                                                                                                  | See appendix: "Data analysis"                                                                                                                 |
| 11 Describe how candidate models were evaluated and how the final model(s) were selected.                                                                                                                                                                                                                                                                                                   | See appendix "Mortality to incidence ratio estimation"                                                                                        |

|                                                                                                                                                                    |                                                                                                                                                                                                                                               |
|--------------------------------------------------------------------------------------------------------------------------------------------------------------------|-----------------------------------------------------------------------------------------------------------------------------------------------------------------------------------------------------------------------------------------------|
|                                                                                                                                                                    | See appendix "CODEm models"<br>See eTable 3: Covariates selected for CODEm for liver cancer and expected direction of covariate                                                                                                               |
| 12 Provide the results of an evaluation of model performance, if done, as well as the results of any relevant sensitivity analysis.                                | See eTable 5: Results for CODEm model testing                                                                                                                                                                                                 |
| 13 Describe methods of calculating uncertainty of the estimates. State which sources of uncertainty were, and were not, accounted for in the uncertainty analysis. | See appendix "Data analysis"                                                                                                                                                                                                                  |
| 14 State how analytic or statistical source code used to generate estimates can be accessed.                                                                       | <a href="http://ghdx.healthdata.org/gbd-2015-code">http://ghdx.healthdata.org/gbd-2015-code</a>                                                                                                                                               |
| <b>RESULTS AND DISCUSSION</b>                                                                                                                                      |                                                                                                                                                                                                                                               |
| 15 Provide published estimates in a file format from which data can be efficiently extracted.                                                                      | GBD 2015 estimates are available online ( <a href="http://vizhub.healthdata.org/gbd-compare">http://vizhub.healthdata.org/gbd-compare</a> ). WebTables specific to the GBD 2015 cancer results are available online (see link in main paper). |
| 16 Report a quantitative measure of the uncertainty of the estimates (e.g., uncertainty intervals).                                                                | Done                                                                                                                                                                                                                                          |
| 17 Interpret results in light of existing evidence. If updating a previous set of estimates, describe the reasons for changes in estimates.                        | eTable 3: Covariates selected for CODEm for liver cancer and expected direction of covariate                                                                                                                                                  |
| 18 Discuss limitations of the estimates. Include a discussion of any modelling assumptions or data limitations that affect interpretation of the estimates.        | See main manuscript "Limitations"                                                                                                                                                                                                             |

417

eTable 2: Data-rich countries including number of years with 95% completeness of vital registration system data

| Super Region                                     | Region                   | Country        | Number of years with 95% completeness |
|--------------------------------------------------|--------------------------|----------------|---------------------------------------|
| Southeast Asia, East Asia, and Oceania           | Southeast Asia           | Mauritius      | 35                                    |
| Southeast Asia, East Asia, and Oceania           | Southeast Asia           | Philippines    | 33                                    |
| Southeast Asia, East Asia, and Oceania           | Southeast Asia           | Sri Lanka      | 26                                    |
| Central Europe, Eastern Europe, and Central Asia | Central Asia             | Kazakhstan     | 29                                    |
| Central Europe, Eastern Europe, and Central Asia | Central Europe           | Bulgaria       | 33                                    |
| Central Europe, Eastern Europe, and Central Asia | Central Europe           | Croatia        | 29                                    |
| Central Europe, Eastern Europe, and Central Asia | Central Europe           | Czech Republic | 28                                    |
| Central Europe, Eastern Europe, and Central Asia | Central Europe           | Hungary        | 34                                    |
| Central Europe, Eastern Europe, and Central Asia | Central Europe           | Poland         | 32                                    |
| Central Europe, Eastern Europe, and Central Asia | Central Europe           | Romania        | 33                                    |
| Central Europe, Eastern Europe, and Central Asia | Central Europe           | Slovenia       | 26                                    |
| Central Europe, Eastern Europe, and Central Asia | Eastern Europe           | Estonia        | 30                                    |
| Central Europe, Eastern Europe, and Central Asia | Eastern Europe           | Latvia         | 33                                    |
| Central Europe, Eastern Europe, and Central Asia | Eastern Europe           | Lithuania      | 31                                    |
| Central Europe, Eastern Europe, and Central Asia | Eastern Europe           | Moldova        | 31                                    |
| Central Europe, Eastern Europe, and Central Asia | Eastern Europe           | Russia         | 35                                    |
| Central Europe, Eastern Europe, and Central Asia | Eastern Europe           | Ukraine        | 30                                    |
| High-income                                      | High-income Asia Pacific | Japan          | 34                                    |
| High-income                                      | High-income Asia Pacific | South Korea    | 29                                    |
| High-income                                      | High-income Asia Pacific | Singapore      | 35                                    |
| High-income                                      | Australasia              | Australia      | 32                                    |
| High-income                                      | Australasia              | New Zealand    | 33                                    |
| High-income                                      | Western Europe           | Austria        | 35                                    |
| High-income                                      | Western Europe           | Belgium        | 33                                    |
| High-income                                      | Western Europe           | Denmark        | 33                                    |
| High-income                                      | Western Europe           | Finland        | 34                                    |
| High-income                                      | Western Europe           | France         | 32                                    |
| High-income                                      | Western Europe           | Germany        | 34                                    |
| High-income                                      | Western Europe           | Greece         | 33                                    |



|                             |                           |                                  |    |
|-----------------------------|---------------------------|----------------------------------|----|
| High-income                 | Western Europe            | Iceland                          | 30 |
| High-income                 | Western Europe            | Ireland                          | 33 |
| High-income                 | Western Europe            | Israel                           | 34 |
| High-income                 | Western Europe            | Italy                            | 31 |
| High-income                 | Western Europe            | Luxembourg                       | 34 |
| High-income                 | Western Europe            | Malta                            | 35 |
| High-income                 | Western Europe            | Netherlands                      | 34 |
| High-income                 | Western Europe            | Norway                           | 34 |
| High-income                 | Western Europe            | Portugal                         | 32 |
| High-income                 | Western Europe            | Spain                            | 34 |
| High-income                 | Western Europe            | Sweden                           | 32 |
| High-income                 | Western Europe            | Switzerland                      | 34 |
| High-income                 | Western Europe            | United Kingdom                   | 34 |
| High-income                 | Southern Latin America    | Argentina                        | 34 |
| High-income                 | Southern Latin America    | Chile                            | 34 |
| High-income                 | Southern Latin America    | Uruguay                          | 32 |
| High-income                 | High-income North America | Canada                           | 32 |
| High-income                 | High-income North America | United States                    | 34 |
| Latin America and Caribbean | Caribbean                 | Antigua and Barbuda              | 28 |
| Latin America and Caribbean | Caribbean                 | Barbados                         | 29 |
| Latin America and Caribbean | Caribbean                 | Bermuda                          | 32 |
| Latin America and Caribbean | Caribbean                 | Cuba                             | 34 |
| Latin America and Caribbean | Caribbean                 | Puerto Rico                      | 33 |
| Latin America and Caribbean | Caribbean                 | Saint Lucia                      | 29 |
| Latin America and Caribbean | Caribbean                 | Saint Vincent and the Grenadines | 26 |
| Latin America and Caribbean | Caribbean                 | Trinidad and Tobago              | 30 |
| Latin America and Caribbean | Central Latin America     | Colombia                         | 31 |
| Latin America and Caribbean | Central Latin America     | Costa Rica                       | 34 |
| Latin America and Caribbean | Central Latin America     | Guatemala                        | 31 |
| Latin America and Caribbean | Central Latin America     | Mexico                           | 34 |

|                              |                              |           |    |
|------------------------------|------------------------------|-----------|----|
| Latin America and Caribbean  | Central Latin America        | Venezuela | 30 |
| North Africa and Middle East | North Africa and Middle East | Kuwait    | 29 |

419

420

*eTable 3: Covariates selected for CODEm for liver cancer and expected direction of covariate*

| Covariate                                         | Sex          | Age         | Direction |
|---------------------------------------------------|--------------|-------------|-----------|
| Education (years per capita)                      | Male, Female | 5-80+ years | -1        |
| Health System Access 2 (unitless)                 |              |             | -1        |
| LDI (I\$ per capita)                              |              |             | -1        |
| Sociodemographic Index                            |              |             | 0         |
| Alcohol (liters per capita)                       |              |             | 1         |
| Animal Fats (kcal per capita)                     |              |             | 1         |
| Cumulative Cigarettes (15 Years)                  |              |             | 1         |
| Cumulative Cigarettes (20 Years)                  |              |             | 1         |
| Diabetes Age-Standardized Prevalence (proportion) |              |             | 1         |
| Hepatitis B Prevalence (proportion)               |              |             | 1         |
| Hepatitis C Prevalence (proportion)               |              |             | 1         |
| Log-transformed SEV scalar: Liver Cancer          |              |             | 1         |
| Mean BMI                                          |              |             | 1         |
| Red Meat (kcal per capita)                        |              |             | 1         |
| Tobacco (cigarettes per capita)                   |              |             | 1         |

421

422 *eTable 4: Results for CODEm model testing*

| Cause                    | Sex    | Age Start | Age End   | Predictive validity |          |          |           |             |              |
|--------------------------|--------|-----------|-----------|---------------------|----------|----------|-----------|-------------|--------------|
|                          |        |           |           | RMSE In             | RMSE out | Trend In | Trend Out | Coverage In | Coverage Out |
| Liver cancer [Global]    | Male   | 5-9 years | 80+ years | 0.290082            | 0.476742 | 0.225369 | 0.221722  | 0.996852    | 0.976022     |
| Liver cancer [Data-Rich] | Male   | 5-9 years | 80+ years | 0.258174            | 0.315295 | 0.211928 | 0.23142   | 0.9955      | 0.994049     |
| Liver cancer [Global]    | Female | 5-9 years | 80+ years | 0.31063             | 0.451614 | 0.236595 | 0.228335  | 0.997464    | 0.982088     |
| Liver cancer [Data-Rich] | Female | 5-9 years | 80+ years | 0.263012            | 0.319542 | 0.218949 | 0.24845   | 0.995481    | 0.993135     |

RMSE: root-mean-square error  
 Countries include in the data-rich models are shown in eTable 4

423

424 *eTable 5: References for etiology splits by country*

| Country   | Years included in estimation (start, end) |      | Citation                                                                                                                                                                                                                                                                                                                                                                           | Liver cancer etiology           |
|-----------|-------------------------------------------|------|------------------------------------------------------------------------------------------------------------------------------------------------------------------------------------------------------------------------------------------------------------------------------------------------------------------------------------------------------------------------------------|---------------------------------|
| Argentina | 2000                                      | 2005 | Fassio E, Míguez C, Soria S, Palazzo F, Gadano A, Adrover R, Landeira G, Fernández N, García D, Barbero R, Perelstein G, Ríos B, Isla R, Civetta E, Pérez Ravier R, Barzola S, Curciarello J, Colombato LA, Jmeniltzky A. Etiology of hepatocellular carcinoma in Argentina: results of a multicenter retrospective study. <i>Acta Gastroenterol Latinoam.</i> 2009; 39(1): 47-52. | Liver cancer due to alcohol use |
| Argentina | 2000                                      | 2005 | Fassio E, Míguez C, Soria S, Palazzo F, Gadano A, Adrover R, Landeira G, Fernández N, García D, Barbero R, Perelstein G, Ríos B, Isla R, Civetta E, Pérez Ravier R, Barzola S, Curciarello J, Colombato LA, Jmeniltzky A. Etiology of hepatocellular carcinoma in Argentina: results of a multicenter retrospective study. <i>Acta Gastroenterol Latinoam.</i> 2009; 39(1): 47-52. | Liver cancer due to hepatitis B |
| Argentina | 2000                                      | 2005 | Fassio E, Míguez C, Soria S, Palazzo F, Gadano A, Adrover R, Landeira G, Fernández N, García D, Barbero R, Perelstein G, Ríos B, Isla R, Civetta E, Pérez Ravier R, Barzola S, Curciarello J, Colombato LA, Jmeniltzky A. Etiology of hepatocellular carcinoma in Argentina: results of a multicenter retrospective study. <i>Acta Gastroenterol Latinoam.</i> 2009; 39(1): 47-52. | Liver cancer due to hepatitis C |

| Country    | Years included in estimation (start, end) |      | Citation                                                                                                                                                                                           | Liver cancer etiology            |
|------------|-------------------------------------------|------|----------------------------------------------------------------------------------------------------------------------------------------------------------------------------------------------------|----------------------------------|
| Australia  | 1975                                      | 1983 | Roberts SK, Kemp W. Hepatocellular carcinoma in an Australian tertiary referral hospital 1975-2002: change in epidemiology and clinical presentation. J Gastroenterol Hepatol. 2007; 22(2): 191-6. | Liver cancer due to alcohol use  |
| Australia  | 1975                                      | 1983 | Roberts SK, Kemp W. Hepatocellular carcinoma in an Australian tertiary referral hospital 1975-2002: change in epidemiology and clinical presentation. J Gastroenterol Hepatol. 2007; 22(2): 191-6. | Liver cancer due to hepatitis B  |
| Australia  | 1975                                      | 1983 | Roberts SK, Kemp W. Hepatocellular carcinoma in an Australian tertiary referral hospital 1975-2002: change in epidemiology and clinical presentation. J Gastroenterol Hepatol. 2007; 22(2): 191-6. | Liver cancer due to hepatitis C  |
| Australia  | 1975                                      | 1983 | Roberts SK, Kemp W. Hepatocellular carcinoma in an Australian tertiary referral hospital 1975-2002: change in epidemiology and clinical presentation. J Gastroenterol Hepatol. 2007; 22(2): 191-6. | Liver cancer due to other causes |
| Australia  | 1995                                      | 2002 | Roberts SK, Kemp W. Hepatocellular carcinoma in an Australian tertiary referral hospital 1975-2002: change in epidemiology and clinical presentation. J Gastroenterol Hepatol. 2007; 22(2): 191-6. | Liver cancer due to alcohol use  |
| Australia  | 1995                                      | 2002 | Roberts SK, Kemp W. Hepatocellular carcinoma in an Australian tertiary referral hospital 1975-2002: change in epidemiology and clinical presentation. J Gastroenterol Hepatol. 2007; 22(2): 191-6. | Liver cancer due to hepatitis B  |
| Australia  | 1995                                      | 2002 | Roberts SK, Kemp W. Hepatocellular carcinoma in an Australian tertiary referral hospital 1975-2002: change in epidemiology and clinical presentation. J Gastroenterol Hepatol. 2007; 22(2): 191-6. | Liver cancer due to hepatitis C  |
| Australia  | 1995                                      | 2002 | Roberts SK, Kemp W. Hepatocellular carcinoma in an Australian tertiary referral hospital 1975-2002: change in epidemiology and clinical presentation. J Gastroenterol Hepatol. 2007; 22(2): 191-6. | Liver cancer due to other causes |
| Bangladesh | 1973                                      | 1992 | Zaman S, Khan M, Alam K, Williams R. Primary hepatocellular carcinoma and viral hepatitis B and C infection in Bangladeshi subjects. J Trop Med Hyg. 1995; 98(1): 64-8.                            | Liver cancer due to hepatitis B  |
| Bangladesh | 1973                                      | 1992 | Zaman S, Khan M, Alam K, Williams R. Primary hepatocellular carcinoma and viral hepatitis B and C infection in Bangladeshi subjects. J Trop Med Hyg. 1995; 98(1): 64-8.                            | Liver cancer due to hepatitis C  |
| Brazil     | 2004                                      | 2009 | Carrilho FJ, Kikuchi L, Branco F, Goncalves CS, Mattos AA de, Brazilian HCC Study Group. Clinical                                                                                                  | Liver cancer                     |

| Country | Years included in estimation (start, end) |      | Citation                                                                                                                                                                                                                                                                                               | Liver cancer etiology            |
|---------|-------------------------------------------|------|--------------------------------------------------------------------------------------------------------------------------------------------------------------------------------------------------------------------------------------------------------------------------------------------------------|----------------------------------|
|         |                                           |      | and epidemiological aspects of hepatocellular carcinoma in Brazil. Clinics (Sao Paulo). 2010; 65(12): 1285-90.                                                                                                                                                                                         | due to alcohol use               |
| Brazil  | 2004                                      | 2009 | Carrilho FJ, Kikuchi L, Branco F, Goncalves CS, Mattos AA de, Brazilian HCC Study Group. Clinical and epidemiological aspects of hepatocellular carcinoma in Brazil. Clinics (Sao Paulo). 2010; 65(12): 1285-90.                                                                                       | Liver cancer due to hepatitis B  |
| Brazil  | 2004                                      | 2009 | Carrilho FJ, Kikuchi L, Branco F, Goncalves CS, Mattos AA de, Brazilian HCC Study Group. Clinical and epidemiological aspects of hepatocellular carcinoma in Brazil. Clinics (Sao Paulo). 2010; 65(12): 1285-90.                                                                                       | Liver cancer due to hepatitis C  |
| Brazil  | 2004                                      | 2009 | Carrilho FJ, Kikuchi L, Branco F, Goncalves CS, Mattos AA de, Brazilian HCC Study Group. Clinical and epidemiological aspects of hepatocellular carcinoma in Brazil. Clinics (Sao Paulo). 2010; 65(12): 1285-90.                                                                                       | Liver cancer due to other causes |
| Brazil  | 1992                                      | 1994 | Gonçalves CS, Pereira FE, Gayotto LC. Hepatocellular carcinoma in Brazil: report of a national survey (Florianópolis, SC, 1995). Rev Inst Med Trop Sao Paulo. 1997; 39(3): 165-70.                                                                                                                     | Liver cancer due to alcohol use  |
| Brazil  | 1992                                      | 1994 | Gonçalves CS, Pereira FE, Gayotto LC. Hepatocellular carcinoma in Brazil: report of a national survey (Florianópolis, SC, 1995). Rev Inst Med Trop Sao Paulo. 1997; 39(3): 165-70.                                                                                                                     | Liver cancer due to hepatitis B  |
| Brazil  | 1992                                      | 1994 | Gonçalves CS, Pereira FE, Gayotto LC. Hepatocellular carcinoma in Brazil: report of a national survey (Florianópolis, SC, 1995). Rev Inst Med Trop Sao Paulo. 1997; 39(3): 165-70.                                                                                                                     | Liver cancer due to hepatitis C  |
| Brazil  | 1992                                      | 1994 | Gonçalves CS, Pereira FE, Gayotto LC. Hepatocellular carcinoma in Brazil: report of a national survey (Florianópolis, SC, 1995). Rev Inst Med Trop Sao Paulo. 1997; 39(3): 165-70.                                                                                                                     | Liver cancer due to other causes |
| Brazil  | 1992                                      | 1999 | Miranda ECBM, Moia L de JP, Amaral I do SA, Barbosa MS de B, Conde SRS da S, de Araújo MTF, da Cruz E do RM, Demachki S, Bensabath G, Soares M do CP. [Hepatitis B and C virus infection and the hepatocellular carcinoma in the East Amazon, Brazil]. Rev Soc Bras Med Trop. 2004; 37(Supp 2): 47-51. | Liver cancer due to hepatitis B  |
| Brazil  | 1992                                      | 1999 | Miranda ECBM, Moia L de JP, Amaral I do SA, Barbosa MS de B, Conde SRS da S, de Araújo MTF, da Cruz E do RM, Demachki S, Bensabath G, Soares M do CP. [Hepatitis B and C virus infection and the hepatocellular carcinoma in the East Amazon, Brazil]. Rev Soc Bras Med Trop. 2004; 37(Supp 2): 47-51. | Liver cancer due to hepatitis C  |

| Country | Years included in estimation (start, end) |      | Citation                                                                                                                                                                                                                                               | Liver cancer etiology            |
|---------|-------------------------------------------|------|--------------------------------------------------------------------------------------------------------------------------------------------------------------------------------------------------------------------------------------------------------|----------------------------------|
| Brazil  | 1998                                      | 2010 | Osório FMF, Lauer GM, Lima AS, Vidigal PVT, Ferrari TCA, Couto CA. Epidemiological aspects of hepatocellular carcinoma in a referral center of Minas Gerais, Brazil. <i>Arq Gastroenterol.</i> 2013; 50(2): 97-100.                                    | Liver cancer due to alcohol use  |
| Brazil  | 1998                                      | 2010 | Osório FMF, Lauer GM, Lima AS, Vidigal PVT, Ferrari TCA, Couto CA. Epidemiological aspects of hepatocellular carcinoma in a referral center of Minas Gerais, Brazil. <i>Arq Gastroenterol.</i> 2013; 50(2): 97-100.                                    | Liver cancer due to hepatitis B  |
| Brazil  | 1998                                      | 2010 | Osório FMF, Lauer GM, Lima AS, Vidigal PVT, Ferrari TCA, Couto CA. Epidemiological aspects of hepatocellular carcinoma in a referral center of Minas Gerais, Brazil. <i>Arq Gastroenterol.</i> 2013; 50(2): 97-100.                                    | Liver cancer due to hepatitis C  |
| Brazil  | 1998                                      | 2010 | Osório FMF, Lauer GM, Lima AS, Vidigal PVT, Ferrari TCA, Couto CA. Epidemiological aspects of hepatocellular carcinoma in a referral center of Minas Gerais, Brazil. <i>Arq Gastroenterol.</i> 2013; 50(2): 97-100.                                    | Liver cancer due to other causes |
| China   | 1998                                      | 2000 | Gao JD, Shao YF, Xu Y, Ming LH, Wu ZY, Liu GT, Wang XH, Gao WH, Sun YT, Feng XL, Liang LM, Zhang YH, Sun ZT. Tight association of hepatocellular carcinoma with HBV infection in North China. <i>Hepatobiliary Pancreat Dis Int.</i> 2005; 4(1): 46-9. | Liver cancer due to hepatitis B  |
| China   | 1998                                      | 2000 | Gao JD, Shao YF, Xu Y, Ming LH, Wu ZY, Liu GT, Wang XH, Gao WH, Sun YT, Feng XL, Liang LM, Zhang YH, Sun ZT. Tight association of hepatocellular carcinoma with HBV infection in North China. <i>Hepatobiliary Pancreat Dis Int.</i> 2005; 4(1): 46-9. | Liver cancer due to hepatitis C  |
| China   | 1994                                      | 2000 | Ming L, Thorgeirsson SS, Gail MH, Lu P, Harris CC, Wang N, Shao Y, Wu Z, Liu G, Wang X, Sun Z. Dominant role of hepatitis B virus and cofactor role of aflatoxin in hepatocarcinogenesis in Qidong, China. <i>Hepatology.</i> 2002; 36(5): 1214-20.    | Liver cancer due to hepatitis B  |
| China   | 1994                                      | 2000 | Ming L, Thorgeirsson SS, Gail MH, Lu P, Harris CC, Wang N, Shao Y, Wu Z, Liu G, Wang X, Sun Z. Dominant role of hepatitis B virus and cofactor role of aflatoxin in hepatocarcinogenesis in Qidong, China. <i>Hepatology.</i> 2002; 36(5): 1214-20.    | Liver cancer due to hepatitis C  |
| China   | 1991                                      | 1993 | Shi J, Zhu L, Liu S, Xie W-F. A meta-analysis of case-control studies on the combined effect of hepatitis B and C virus infections in causing hepatocellular carcinoma in China. <i>Br J Cancer.</i> 2005; 92(3): 607-12.                              | Liver cancer due to hepatitis B  |
| China   | 1991                                      | 1993 | Shi J, Zhu L, Liu S, Xie W-F. A meta-analysis of case-control studies on the combined effect of hepatitis B and C virus infections in causing hepatocellular carcinoma in China. <i>Br J Cancer.</i> 2005; 92(3): 607-12.                              | Liver cancer due to hepatitis C  |
| China   | 1994                                      | 1996 | Shi J, Zhu L, Liu S, Xie W-F. A meta-analysis of case-control studies on the combined effect of                                                                                                                                                        | Liver cancer                     |

| Country  | Years included in estimation (start, end) |      | Citation                                                                                                                                                                                                                                                                                                                                                                                                                        | Liver cancer etiology            |
|----------|-------------------------------------------|------|---------------------------------------------------------------------------------------------------------------------------------------------------------------------------------------------------------------------------------------------------------------------------------------------------------------------------------------------------------------------------------------------------------------------------------|----------------------------------|
|          |                                           |      | hepatitis B and C virus infections in causing hepatocellular carcinoma in China. Br J Cancer. 2005; 92(3): 607-12.                                                                                                                                                                                                                                                                                                              | due to hepatitis B               |
| China    | 1994                                      | 1996 | Shi J, Zhu L, Liu S, Xie W-F. A meta-analysis of case-control studies on the combined effect of hepatitis B and C virus infections in causing hepatocellular carcinoma in China. Br J Cancer. 2005; 92(3): 607-12.                                                                                                                                                                                                              | Liver cancer due to hepatitis C  |
| China    | 2000                                      | 2002 | Wang B-E, Ma W-M, Sulaiman A, Noer S, Sumoharjo S, Sumarsidi D, Tandon BN, Nakao K, Mishiro S, Miyakawa Y, Akahane Y, Suzuki H. Demographic, clinical, and virological characteristics of hepatocellular carcinoma in Asia: survey of 414 patients from four countries. J Med Virol. 2002; 67(3): 394-400.                                                                                                                      | Liver cancer due to hepatitis B  |
| China    | 2000                                      | 2002 | Wang B-E, Ma W-M, Sulaiman A, Noer S, Sumoharjo S, Sumarsidi D, Tandon BN, Nakao K, Mishiro S, Miyakawa Y, Akahane Y, Suzuki H. Demographic, clinical, and virological characteristics of hepatocellular carcinoma in Asia: survey of 414 patients from four countries. J Med Virol. 2002; 67(3): 394-400.                                                                                                                      | Liver cancer due to hepatitis C  |
| China    | 2000                                      | 2002 | Wang B-E, Ma W-M, Sulaiman A, Noer S, Sumoharjo S, Sumarsidi D, Tandon BN, Nakao K, Mishiro S, Miyakawa Y, Akahane Y, Suzuki H. Demographic, clinical, and virological characteristics of hepatocellular carcinoma in Asia: survey of 414 patients from four countries. J Med Virol. 2002; 67(3): 394-400.                                                                                                                      | Liver cancer due to other causes |
| China    | 1994                                      | 1995 | Zhang JY, Dai M, Wang X, Lu WQ, Li DS, Zhang MX, Wang KJ, Dai LP, Han SG, Zhou YF, Zhuang H. A case-control study of hepatitis B and C virus infection as risk factors for hepatocellular carcinoma in Henan, China. Int J Epidemiol. 1998; 27(4): 574-8.                                                                                                                                                                       | Liver cancer due to hepatitis B  |
| China    | 1994                                      | 1995 | Zhang JY, Dai M, Wang X, Lu WQ, Li DS, Zhang MX, Wang KJ, Dai LP, Han SG, Zhou YF, Zhuang H. A case-control study of hepatitis B and C virus infection as risk factors for hepatocellular carcinoma in Henan, China. Int J Epidemiol. 1998; 27(4): 574-8.                                                                                                                                                                       | Liver cancer due to hepatitis C  |
| Colombia | 2000                                      | 2007 | Navas M-C, Suarez I, Carreño A, Uribe D, Rios WA, Cortes-Mancera F, Martel G, Vieco B, Lozano D, Jimenez C, Gouas D, Osorio G, Hoyos S, Restrepo JC, Correa G, Jaramillo S, Lopez R, Bravo LE, Arbelaez MP, Scoazec J-Y, Abedi-Ardekani B, Santella RM, Chemin I, Hainaut P. Hepatitis B and Hepatitis C Infection Biomarkers and TP53 Mutations in Hepatocellular Carcinomas from Colombia. Hepat Res Treat. 2011; 2011: 1-10. | Liver cancer due to hepatitis B  |
| Colombia | 2000                                      | 2007 | Navas M-C, Suarez I, Carreño A, Uribe D, Rios WA, Cortes-Mancera F, Martel G, Vieco B, Lozano D, Jimenez C, Gouas D, Osorio G, Hoyos S, Restrepo JC, Correa G, Jaramillo S, Lopez R, Bravo LE, Arbelaez MP, Scoazec J-Y, Abedi-Ardekani B, Santella RM, Chemin I, Hainaut P. Hepatitis B and                                                                                                                                    | Liver cancer due to hepatitis C  |

| Country | Years included in estimation (start, end) |      | Citation                                                                                                                                                                                                                                  | Liver cancer etiology            |
|---------|-------------------------------------------|------|-------------------------------------------------------------------------------------------------------------------------------------------------------------------------------------------------------------------------------------------|----------------------------------|
|         |                                           |      | Hepatitis C Infection Biomarkers and TP53 Mutations in Hepatocellular Carcinomas from Colombia. <i>Hepat Res Treat.</i> 2011; 2011: 1-10.                                                                                                 |                                  |
| Croatia | 2006                                      | 2009 | Constantin CV, Streba CT, Rogoveanu I, Nita-Stefanescu L, Ionescu AG. Cirrhosis and Chronic Viral Hepatitis as Risk Factors for Hepatocellular Carcinoma: Romanian Single-clinic Experience. <i>Maedica (Buchar).</i> 2010; 5(4): 265-70. | Liver cancer due to alcohol use  |
| Croatia | 2006                                      | 2009 | Constantin CV, Streba CT, Rogoveanu I, Nita-Stefanescu L, Ionescu AG. Cirrhosis and Chronic Viral Hepatitis as Risk Factors for Hepatocellular Carcinoma: Romanian Single-clinic Experience. <i>Maedica (Buchar).</i> 2010; 5(4): 265-70. | Liver cancer due to hepatitis B  |
| Croatia | 2006                                      | 2009 | Constantin CV, Streba CT, Rogoveanu I, Nita-Stefanescu L, Ionescu AG. Cirrhosis and Chronic Viral Hepatitis as Risk Factors for Hepatocellular Carcinoma: Romanian Single-clinic Experience. <i>Maedica (Buchar).</i> 2010; 5(4): 265-70. | Liver cancer due to hepatitis C  |
| Egypt   | 2009                                      | 2010 | Abou El Azm AR, Yousef M, Mansour N, Awad A, El Dardiry S, Abdel Aziz I. New insights on non-B non-C hepatocellular carcinoma in mid Delta Region, Egypt. <i>J Gastrointest Cancer.</i> 2014; 45(3): 276-83.                              | Liver cancer due to hepatitis B  |
| Egypt   | 2009                                      | 2010 | Abou El Azm AR, Yousef M, Mansour N, Awad A, El Dardiry S, Abdel Aziz I. New insights on non-B non-C hepatocellular carcinoma in mid Delta Region, Egypt. <i>J Gastrointest Cancer.</i> 2014; 45(3): 276-83.                              | Liver cancer due to hepatitis C  |
| Egypt   | 2009                                      | 2010 | Abou El Azm AR, Yousef M, Mansour N, Awad A, El Dardiry S, Abdel Aziz I. New insights on non-B non-C hepatocellular carcinoma in mid Delta Region, Egypt. <i>J Gastrointest Cancer.</i> 2014; 45(3): 276-83.                              | Liver cancer due to other causes |
| Egypt   | 2010                                      | 2011 | Abou El Azm AR, Yousef M, Mansour N, Awad A, El Dardiry S, Abdel Aziz I. New insights on non-B non-C hepatocellular carcinoma in mid Delta Region, Egypt. <i>J Gastrointest Cancer.</i> 2014; 45(3): 276-83.                              | Liver cancer due to hepatitis B  |
| Egypt   | 2010                                      | 2011 | Abou El Azm AR, Yousef M, Mansour N, Awad A, El Dardiry S, Abdel Aziz I. New insights on non-B non-C hepatocellular carcinoma in mid Delta Region, Egypt. <i>J Gastrointest Cancer.</i> 2014; 45(3): 276-83.                              | Liver cancer due to hepatitis C  |
| Egypt   | 2010                                      | 2011 | Abou El Azm AR, Yousef M, Mansour N, Awad A, El Dardiry S, Abdel Aziz I. New insights on non-B non-C hepatocellular carcinoma in mid Delta Region, Egypt. <i>J Gastrointest Cancer.</i> 2014; 45(3): 276-83.                              | Liver cancer due to other causes |
| Egypt   | 2011                                      | 2012 | Abou El Azm AR, Yousef M, Mansour N, Awad A, El Dardiry S, Abdel Aziz I. New insights on non-B non-C hepatocellular carcinoma in mid Delta Region, Egypt. <i>J Gastrointest Cancer.</i> 2014;                                             | Liver cancer due to              |



| Country | Years included in estimation (start, end) |      | Citation                                                                                                                                                                                                                                 | Liver cancer etiology            |
|---------|-------------------------------------------|------|------------------------------------------------------------------------------------------------------------------------------------------------------------------------------------------------------------------------------------------|----------------------------------|
|         |                                           |      | 45(3): 276-83.                                                                                                                                                                                                                           | hepatitis B                      |
| Egypt   | 2011                                      | 2012 | Abou El Azm AR, Yousef M, Mansour N, Awad A, El Dardiry S, Abdel Aziz I. New insights on non-B non-C hepatocellular carcinoma in mid Delta Region, Egypt. J Gastrointest Cancer. 2014; 45(3): 276-83.                                    | Liver cancer due to hepatitis C  |
| Egypt   | 2011                                      | 2012 | Abou El Azm AR, Yousef M, Mansour N, Awad A, El Dardiry S, Abdel Aziz I. New insights on non-B non-C hepatocellular carcinoma in mid Delta Region, Egypt. J Gastrointest Cancer. 2014; 45(3): 276-83.                                    | Liver cancer due to other causes |
| Egypt   | 1993                                      | 1997 | el-Zayadi A-R, Badran HM, Barakat EMF, Attia M el-D, Shawky S, Mohamed MK, Selim O, Saeid A. Hepatocellular carcinoma in Egypt: a single center study over a decade. World J Gastroenterol. 2005; 11(33): 5193-8.                        | Liver cancer due to hepatitis B  |
| Egypt   | 1993                                      | 1997 | el-Zayadi A-R, Badran HM, Barakat EMF, Attia M el-D, Shawky S, Mohamed MK, Selim O, Saeid A. Hepatocellular carcinoma in Egypt: a single center study over a decade. World J Gastroenterol. 2005; 11(33): 5193-8.                        | Liver cancer due to hepatitis C  |
| Egypt   | 1998                                      | 2002 | el-Zayadi A-R, Badran HM, Barakat EMF, Attia M el-D, Shawky S, Mohamed MK, Selim O, Saeid A. Hepatocellular carcinoma in Egypt: a single center study over a decade. World J Gastroenterol. 2005; 11(33): 5193-8.                        | Liver cancer due to hepatitis B  |
| Egypt   | 1998                                      | 2002 | el-Zayadi A-R, Badran HM, Barakat EMF, Attia M el-D, Shawky S, Mohamed MK, Selim O, Saeid A. Hepatocellular carcinoma in Egypt: a single center study over a decade. World J Gastroenterol. 2005; 11(33): 5193-8.                        | Liver cancer due to hepatitis C  |
| Egypt   | 1995                                      | 1996 | Hassan MM, Zaghloul AS, El-Serag HB, Soliman O, Patt YZ, Chappell CL, Beasley RP, Hwang LY. The role of hepatitis C in hepatocellular carcinoma: a case control study among Egyptian patients. J Clin Gastroenterol. 2001; 33(2): 123-6. | Liver cancer due to hepatitis B  |
| Egypt   | 1995                                      | 1996 | Hassan MM, Zaghloul AS, El-Serag HB, Soliman O, Patt YZ, Chappell CL, Beasley RP, Hwang LY. The role of hepatitis C in hepatocellular carcinoma: a case control study among Egyptian patients. J Clin Gastroenterol. 2001; 33(2): 123-6. | Liver cancer due to hepatitis C  |
| Egypt   | 1995                                      | 1996 | Mabrouk GM. Prevalence of hepatitis C infection and schistosomiasis in Egyptian patients with hepatocellular carcinoma. Dis Markers. 1997; 13(3): 177-82.                                                                                | Liver cancer due to hepatitis B  |
| Egypt   | 1995                                      | 1996 | Mabrouk GM. Prevalence of hepatitis C infection and schistosomiasis in Egyptian patients with hepatocellular carcinoma. Dis Markers. 1997; 13(3): 177-82.                                                                                | Liver cancer due to hepatitis C  |

| Country | Years included in estimation (start, end) |      | Citation                                                                                                                                                                                                                                                              | Liver cancer etiology            |
|---------|-------------------------------------------|------|-----------------------------------------------------------------------------------------------------------------------------------------------------------------------------------------------------------------------------------------------------------------------|----------------------------------|
| Gabon   | 1990                                      | 1998 | Perret J-L, Moussavou-Kombila J-B, Delaporte E, Pemba L-F, Boguikouma J-B, Matton T, Larouze B. [HBs Ag and antibodies to hepatitis C virus in complicated chronic liver disease in Gabon. A case control study]. <i>Gastroenterol Clin Biol.</i> 2002; 26(2): 131-5. | Liver cancer due to hepatitis B  |
| Gabon   | 1990                                      | 1998 | Perret J-L, Moussavou-Kombila J-B, Delaporte E, Pemba L-F, Boguikouma J-B, Matton T, Larouze B. [HBs Ag and antibodies to hepatitis C virus in complicated chronic liver disease in Gabon. A case control study]. <i>Gastroenterol Clin Biol.</i> 2002; 26(2): 131-5. | Liver cancer due to hepatitis C  |
| Germany | 2007                                      | 2008 | Ertle J, Dechêne A, Sowa J-P, Penndorf V, Herzer K, Kaiser G, Schlaak JF, Gerken G, Syn W-K, Canbay A. Non-alcoholic fatty liver disease progresses to hepatocellular carcinoma in the absence of apparent cirrhosis. <i>Int J Cancer.</i> 2011; 128(10): 2436-43.    | Liver cancer due to alcohol use  |
| Germany | 2007                                      | 2008 | Ertle J, Dechêne A, Sowa J-P, Penndorf V, Herzer K, Kaiser G, Schlaak JF, Gerken G, Syn W-K, Canbay A. Non-alcoholic fatty liver disease progresses to hepatocellular carcinoma in the absence of apparent cirrhosis. <i>Int J Cancer.</i> 2011; 128(10): 2436-43.    | Liver cancer due to hepatitis B  |
| Germany | 2007                                      | 2008 | Ertle J, Dechêne A, Sowa J-P, Penndorf V, Herzer K, Kaiser G, Schlaak JF, Gerken G, Syn W-K, Canbay A. Non-alcoholic fatty liver disease progresses to hepatocellular carcinoma in the absence of apparent cirrhosis. <i>Int J Cancer.</i> 2011; 128(10): 2436-43.    | Liver cancer due to hepatitis C  |
| Germany | 2007                                      | 2008 | Ertle J, Dechêne A, Sowa J-P, Penndorf V, Herzer K, Kaiser G, Schlaak JF, Gerken G, Syn W-K, Canbay A. Non-alcoholic fatty liver disease progresses to hepatocellular carcinoma in the absence of apparent cirrhosis. <i>Int J Cancer.</i> 2011; 128(10): 2436-43.    | Liver cancer due to other causes |
| Germany | 1994                                      | 2000 | Hellerbrand C, Hartmann A, Richter G, Knöll A, Wiest R, Schölmerich J, Lock G. Hepatocellular carcinoma in southern Germany: epidemiological and clinicopathological characteristics and risk factors. <i>Dig Dis.</i> 2001; 19(4): 345-51.                           | Liver cancer due to alcohol use  |
| Germany | 1994                                      | 2000 | Hellerbrand C, Hartmann A, Richter G, Knöll A, Wiest R, Schölmerich J, Lock G. Hepatocellular carcinoma in southern Germany: epidemiological and clinicopathological characteristics and risk factors. <i>Dig Dis.</i> 2001; 19(4): 345-51.                           | Liver cancer due to hepatitis B  |
| Germany | 1994                                      | 2000 | Hellerbrand C, Hartmann A, Richter G, Knöll A, Wiest R, Schölmerich J, Lock G. Hepatocellular carcinoma in southern Germany: epidemiological and clinicopathological characteristics and risk factors. <i>Dig Dis.</i> 2001; 19(4): 345-51.                           | Liver cancer due to hepatitis C  |
| Germany | 1994                                      | 2000 | Hellerbrand C, Hartmann A, Richter G, Knöll A, Wiest R, Schölmerich J, Lock G. Hepatocellular carcinoma in southern Germany: epidemiological and clinicopathological characteristics and risk factors. <i>Dig Dis.</i> 2001; 19(4): 345-51.                           | Liver cancer due to other causes |
| Germany | 1994                                      | 2008 | Kirchner G, Kirovski G, Hebestreit A, Schölmerich J, Schlitt HJ, Stoeltzing O, Hellerbrand C.                                                                                                                                                                         | Liver cancer                     |

| Country | Years included in estimation (start, end) |      | Citation                                                                                                                                                                                                                                                                                                             | Liver cancer etiology            |
|---------|-------------------------------------------|------|----------------------------------------------------------------------------------------------------------------------------------------------------------------------------------------------------------------------------------------------------------------------------------------------------------------------|----------------------------------|
|         |                                           |      | Epidemiology and survival of patients with hepatocellular carcinoma in Southern Germany. <i>Int J Clin Exp Med.</i> 2010; 3(2): 169-79.                                                                                                                                                                              | due to alcohol use               |
| Germany | 1994                                      | 2008 | Kirchner G, Kirovski G, Hebestreit A, Schölmerich J, Schlitt HJ, Stoeltzing O, Hellerbrand C. Epidemiology and survival of patients with hepatocellular carcinoma in Southern Germany. <i>Int J Clin Exp Med.</i> 2010; 3(2): 169-79.                                                                                | Liver cancer due to hepatitis B  |
| Germany | 1994                                      | 2008 | Kirchner G, Kirovski G, Hebestreit A, Schölmerich J, Schlitt HJ, Stoeltzing O, Hellerbrand C. Epidemiology and survival of patients with hepatocellular carcinoma in Southern Germany. <i>Int J Clin Exp Med.</i> 2010; 3(2): 169-79.                                                                                | Liver cancer due to hepatitis C  |
| Germany | 1994                                      | 2008 | Kirchner G, Kirovski G, Hebestreit A, Schölmerich J, Schlitt HJ, Stoeltzing O, Hellerbrand C. Epidemiology and survival of patients with hepatocellular carcinoma in Southern Germany. <i>Int J Clin Exp Med.</i> 2010; 3(2): 169-79.                                                                                | Liver cancer due to other causes |
| Germany | 1993                                      | 1997 | Kubicka S, Rudolph KL, Hanke M, Tietze MK, Tillmann HL, Trautwein C, Manns M. Hepatocellular carcinoma in Germany: a retrospective epidemiological study from a low-endemic area. <i>Liver.</i> 2000; 20(4): 312-8.                                                                                                  | Liver cancer due to alcohol use  |
| Germany | 1993                                      | 1997 | Kubicka S, Rudolph KL, Hanke M, Tietze MK, Tillmann HL, Trautwein C, Manns M. Hepatocellular carcinoma in Germany: a retrospective epidemiological study from a low-endemic area. <i>Liver.</i> 2000; 20(4): 312-8.                                                                                                  | Liver cancer due to hepatitis B  |
| Germany | 1993                                      | 1997 | Kubicka S, Rudolph KL, Hanke M, Tietze MK, Tillmann HL, Trautwein C, Manns M. Hepatocellular carcinoma in Germany: a retrospective epidemiological study from a low-endemic area. <i>Liver.</i> 2000; 20(4): 312-8.                                                                                                  | Liver cancer due to hepatitis C  |
| Germany | 1993                                      | 1997 | Kubicka S, Rudolph KL, Hanke M, Tietze MK, Tillmann HL, Trautwein C, Manns M. Hepatocellular carcinoma in Germany: a retrospective epidemiological study from a low-endemic area. <i>Liver.</i> 2000; 20(4): 312-8.                                                                                                  | Liver cancer due to other causes |
| Germany | 1998                                      | 2009 | op den Winkel M, Nagel D, Sappl J, op den Winkel P, Lamerz R, Zech CJ, Straub G, Nickel T, Rentsch M, Stieber P, Göke B, Kolligs FT. Prognosis of patients with hepatocellular carcinoma. Validation and ranking of established staging-systems in a large western HCC-cohort. <i>PLoS One.</i> 2012; 7(10): e45066. | Liver cancer due to alcohol use  |
| Germany | 1998                                      | 2009 | op den Winkel M, Nagel D, Sappl J, op den Winkel P, Lamerz R, Zech CJ, Straub G, Nickel T, Rentsch M, Stieber P, Göke B, Kolligs FT. Prognosis of patients with hepatocellular carcinoma. Validation and ranking of established staging-systems in a large western HCC-cohort. <i>PLoS One.</i> 2012; 7(10): e45066. | Liver cancer due to hepatitis B  |

| Country | Years included in estimation (start, end) |      | Citation                                                                                                                                                                                                                                                                                                      | Liver cancer etiology            |
|---------|-------------------------------------------|------|---------------------------------------------------------------------------------------------------------------------------------------------------------------------------------------------------------------------------------------------------------------------------------------------------------------|----------------------------------|
| Germany | 1998                                      | 2009 | op den Winkel M, Nagel D, Sappl J, op den Winkel P, Lamerz R, Zech CJ, Straub G, Nickel T, Rentsch M, Stieber P, Göke B, Kolligs FT. Prognosis of patients with hepatocellular carcinoma. Validation and ranking of established staging-systems in a large western HCC-cohort. PLoS One. 2012; 7(10): e45066. | Liver cancer due to hepatitis C  |
| Germany | 1998                                      | 2009 | op den Winkel M, Nagel D, Sappl J, op den Winkel P, Lamerz R, Zech CJ, Straub G, Nickel T, Rentsch M, Stieber P, Göke B, Kolligs FT. Prognosis of patients with hepatocellular carcinoma. Validation and ranking of established staging-systems in a large western HCC-cohort. PLoS One. 2012; 7(10): e45066. | Liver cancer due to other causes |
| Germany | 1990                                      | 1997 | Petry W, Heintges T, Hensel F, Erhardt A, Wenning M, Niederau C, Häussinger D. [Hepatocellular carcinoma in Germany. Epidemiology, etiology, clinical aspects and prognosis in 100 consecutive patients of a university clinic]. Z Gastroenterol. 1997; 35(12): 1059-67.                                      | Liver cancer due to alcohol use  |
| Germany | 1990                                      | 1997 | Petry W, Heintges T, Hensel F, Erhardt A, Wenning M, Niederau C, Häussinger D. [Hepatocellular carcinoma in Germany. Epidemiology, etiology, clinical aspects and prognosis in 100 consecutive patients of a university clinic]. Z Gastroenterol. 1997; 35(12): 1059-67.                                      | Liver cancer due to hepatitis B  |
| Germany | 1990                                      | 1997 | Petry W, Heintges T, Hensel F, Erhardt A, Wenning M, Niederau C, Häussinger D. [Hepatocellular carcinoma in Germany. Epidemiology, etiology, clinical aspects and prognosis in 100 consecutive patients of a university clinic]. Z Gastroenterol. 1997; 35(12): 1059-67.                                      | Liver cancer due to hepatitis C  |
| Germany | 1990                                      | 1997 | Petry W, Heintges T, Hensel F, Erhardt A, Wenning M, Niederau C, Häussinger D. [Hepatocellular carcinoma in Germany. Epidemiology, etiology, clinical aspects and prognosis in 100 consecutive patients of a university clinic]. Z Gastroenterol. 1997; 35(12): 1059-67.                                      | Liver cancer due to other causes |
| Germany | 1997                                      | 1999 | Rabe C, Pilz T, Klostermann C, Berna M, Schild HH, Sauerbruch T, Caselmann WH. Clinical characteristics and outcome of a cohort of 101 patients with hepatocellular carcinoma. World J Gastroenterol. 2001; 7(2): 208-15.                                                                                     | Liver cancer due to alcohol use  |
| Germany | 1997                                      | 1999 | Rabe C, Pilz T, Klostermann C, Berna M, Schild HH, Sauerbruch T, Caselmann WH. Clinical characteristics and outcome of a cohort of 101 patients with hepatocellular carcinoma. World J Gastroenterol. 2001; 7(2): 208-15.                                                                                     | Liver cancer due to hepatitis B  |
| Germany | 1997                                      | 1999 | Rabe C, Pilz T, Klostermann C, Berna M, Schild HH, Sauerbruch T, Caselmann WH. Clinical characteristics and outcome of a cohort of 101 patients with hepatocellular carcinoma. World J Gastroenterol. 2001; 7(2): 208-15.                                                                                     | Liver cancer due to hepatitis C  |
| Germany | 1997                                      | 1999 | Rabe C, Pilz T, Klostermann C, Berna M, Schild HH, Sauerbruch T, Caselmann WH. Clinical characteristics and outcome of a cohort of 101 patients with hepatocellular carcinoma. World J Gastroenterol. 2001; 7(2): 208-15.                                                                                     | Liver cancer due to other        |

| Country | Years included in estimation (start, end) |      | Citation                                                                                                                                                                                                                                              | Liver cancer etiology            |
|---------|-------------------------------------------|------|-------------------------------------------------------------------------------------------------------------------------------------------------------------------------------------------------------------------------------------------------------|----------------------------------|
|         |                                           |      | Gastroenterol. 2001; 7(2): 208-15.                                                                                                                                                                                                                    | causes                           |
| Germany | 1994                                      | 1998 | Schütte K, Kipper M, Kahl S, Bornschein J, Götze T, Adolf D, Arend J, Seidensticker R, Lippert H, Ricke J, Malfertheiner P. Clinical characteristics and time trends in etiology of hepatocellular cancer in Germany. Digestion. 2013; 87(3): 147-59. | Liver cancer due to alcohol use  |
| Germany | 1994                                      | 1998 | Schütte K, Kipper M, Kahl S, Bornschein J, Götze T, Adolf D, Arend J, Seidensticker R, Lippert H, Ricke J, Malfertheiner P. Clinical characteristics and time trends in etiology of hepatocellular cancer in Germany. Digestion. 2013; 87(3): 147-59. | Liver cancer due to hepatitis B  |
| Germany | 1994                                      | 1998 | Schütte K, Kipper M, Kahl S, Bornschein J, Götze T, Adolf D, Arend J, Seidensticker R, Lippert H, Ricke J, Malfertheiner P. Clinical characteristics and time trends in etiology of hepatocellular cancer in Germany. Digestion. 2013; 87(3): 147-59. | Liver cancer due to hepatitis C  |
| Germany | 1994                                      | 1998 | Schütte K, Kipper M, Kahl S, Bornschein J, Götze T, Adolf D, Arend J, Seidensticker R, Lippert H, Ricke J, Malfertheiner P. Clinical characteristics and time trends in etiology of hepatocellular cancer in Germany. Digestion. 2013; 87(3): 147-59. | Liver cancer due to other causes |
| Germany | 1999                                      | 2003 | Schütte K, Kipper M, Kahl S, Bornschein J, Götze T, Adolf D, Arend J, Seidensticker R, Lippert H, Ricke J, Malfertheiner P. Clinical characteristics and time trends in etiology of hepatocellular cancer in Germany. Digestion. 2013; 87(3): 147-59. | Liver cancer due to alcohol use  |
| Germany | 1999                                      | 2003 | Schütte K, Kipper M, Kahl S, Bornschein J, Götze T, Adolf D, Arend J, Seidensticker R, Lippert H, Ricke J, Malfertheiner P. Clinical characteristics and time trends in etiology of hepatocellular cancer in Germany. Digestion. 2013; 87(3): 147-59. | Liver cancer due to hepatitis B  |
| Germany | 1999                                      | 2003 | Schütte K, Kipper M, Kahl S, Bornschein J, Götze T, Adolf D, Arend J, Seidensticker R, Lippert H, Ricke J, Malfertheiner P. Clinical characteristics and time trends in etiology of hepatocellular cancer in Germany. Digestion. 2013; 87(3): 147-59. | Liver cancer due to hepatitis C  |
| Germany | 1999                                      | 2003 | Schütte K, Kipper M, Kahl S, Bornschein J, Götze T, Adolf D, Arend J, Seidensticker R, Lippert H, Ricke J, Malfertheiner P. Clinical characteristics and time trends in etiology of hepatocellular cancer in Germany. Digestion. 2013; 87(3): 147-59. | Liver cancer due to other causes |
| Germany | 2004                                      | 2008 | Schütte K, Kipper M, Kahl S, Bornschein J, Götze T, Adolf D, Arend J, Seidensticker R, Lippert H, Ricke J, Malfertheiner P. Clinical characteristics and time trends in etiology of hepatocellular cancer in Germany. Digestion. 2013; 87(3): 147-59. | Liver cancer due to alcohol use  |
| Germany | 2004                                      | 2008 | Schütte K, Kipper M, Kahl S, Bornschein J, Götze T, Adolf D, Arend J, Seidensticker R, Lippert H, Ricke J, Malfertheiner P. Clinical characteristics and time trends in etiology of hepatocellular cancer in Germany. Digestion. 2013; 87(3): 147-59. | Liver cancer due to hepatitis B  |

| Country | Years included in estimation (start, end) |      | Citation                                                                                                                                                                                                                                                                     | Liver cancer etiology            |
|---------|-------------------------------------------|------|------------------------------------------------------------------------------------------------------------------------------------------------------------------------------------------------------------------------------------------------------------------------------|----------------------------------|
| Germany | 2004                                      | 2008 | Schütte K, Kipper M, Kahl S, Bornschein J, Götze T, Adolf D, Arend J, Seidensticker R, Lippert H, Ricke J, Malfertheiner P. Clinical characteristics and time trends in etiology of hepatocellular cancer in Germany. <i>Digestion</i> . 2013; 87(3): 147-59.                | Liver cancer due to hepatitis C  |
| Germany | 2004                                      | 2008 | Schütte K, Kipper M, Kahl S, Bornschein J, Götze T, Adolf D, Arend J, Seidensticker R, Lippert H, Ricke J, Malfertheiner P. Clinical characteristics and time trends in etiology of hepatocellular cancer in Germany. <i>Digestion</i> . 2013; 87(3): 147-59.                | Liver cancer due to other causes |
| Germany | 2009                                      | 2011 | Schütte K, Kipper M, Kahl S, Bornschein J, Götze T, Adolf D, Arend J, Seidensticker R, Lippert H, Ricke J, Malfertheiner P. Clinical characteristics and time trends in etiology of hepatocellular cancer in Germany. <i>Digestion</i> . 2013; 87(3): 147-59.                | Liver cancer due to alcohol use  |
| Germany | 2009                                      | 2011 | Schütte K, Kipper M, Kahl S, Bornschein J, Götze T, Adolf D, Arend J, Seidensticker R, Lippert H, Ricke J, Malfertheiner P. Clinical characteristics and time trends in etiology of hepatocellular cancer in Germany. <i>Digestion</i> . 2013; 87(3): 147-59.                | Liver cancer due to hepatitis B  |
| Germany | 2009                                      | 2011 | Schütte K, Kipper M, Kahl S, Bornschein J, Götze T, Adolf D, Arend J, Seidensticker R, Lippert H, Ricke J, Malfertheiner P. Clinical characteristics and time trends in etiology of hepatocellular cancer in Germany. <i>Digestion</i> . 2013; 87(3): 147-59.                | Liver cancer due to hepatitis C  |
| Germany | 2009                                      | 2011 | Schütte K, Kipper M, Kahl S, Bornschein J, Götze T, Adolf D, Arend J, Seidensticker R, Lippert H, Ricke J, Malfertheiner P. Clinical characteristics and time trends in etiology of hepatocellular cancer in Germany. <i>Digestion</i> . 2013; 87(3): 147-59.                | Liver cancer due to other causes |
| Greece  | 1995                                      | 1998 | Kuper HE, Tzonou A, Kaklamani E, Hadziyannis S, Tasopoulos N, Lagiou P, Trichopoulos D, Stuver S. Hepatitis B and C viruses in the etiology of hepatocellular carcinoma; a study in Greece using third-generation assays. <i>Cancer Causes Control</i> . 2000; 11(2): 171-5. | Liver cancer due to hepatitis B  |
| Greece  | 1995                                      | 1998 | Kuper HE, Tzonou A, Kaklamani E, Hadziyannis S, Tasopoulos N, Lagiou P, Trichopoulos D, Stuver S. Hepatitis B and C viruses in the etiology of hepatocellular carcinoma; a study in Greece using third-generation assays. <i>Cancer Causes Control</i> . 2000; 11(2): 171-5. | Liver cancer due to hepatitis C  |
| Greece  | 1996                                      | 2000 | Raptis I, Koskinas J, Emmanouil T, Hadziyannis S. Changing relative roles of hepatitis B and C viruses in the aetiology of hepatocellular carcinoma in Greece. <i>Epidemiological and clinical observations</i> . <i>J Viral Hepat</i> . 2003; 10(6): 450-4.                 | Liver cancer due to hepatitis B  |
| Greece  | 1996                                      | 2000 | Raptis I, Koskinas J, Emmanouil T, Hadziyannis S. Changing relative roles of hepatitis B and C viruses in the aetiology of hepatocellular carcinoma in Greece. <i>Epidemiological and clinical observations</i> . <i>J Viral Hepat</i> . 2003; 10(6): 450-4.                 | Liver cancer due to hepatitis C  |
| India   | 1991                                      | 2003 | Kumar R, Saraswat MK, Sharma BC, Sakhuja P, Sarin SK. Characteristics of hepatocellular                                                                                                                                                                                      | Liver cancer                     |

| Country | Years included in estimation (start, end) |      | Citation                                                                                                                                                                                                                      | Liver cancer etiology            |
|---------|-------------------------------------------|------|-------------------------------------------------------------------------------------------------------------------------------------------------------------------------------------------------------------------------------|----------------------------------|
|         |                                           |      | carcinoma in India: a retrospective analysis of 191 cases. QJM. 2008; 101(6): 479-85.                                                                                                                                         | due to alcohol use               |
| India   | 1991                                      | 2003 | Kumar R, Saraswat MK, Sharma BC, Sakhuja P, Sarin SK. Characteristics of hepatocellular carcinoma in India: a retrospective analysis of 191 cases. QJM. 2008; 101(6): 479-85.                                                 | Liver cancer due to hepatitis C  |
| India   | 1991                                      | 2003 | Kumar R, Saraswat MK, Sharma BC, Sakhuja P, Sarin SK. Characteristics of hepatocellular carcinoma in India: a retrospective analysis of 191 cases. QJM. 2008; 101(6): 479-85.                                                 | Liver cancer due to other causes |
| India   | 1993                                      | 1999 | Sarin SK, Thakur V, Guptan RC, Saigal S, Malhotra V, Thyagarajan SP, Das BC. Profile of hepatocellular carcinoma in India: an insight into the possible etiologic associations. J Gastroenterol Hepatol. 2001; 16(6): 666-73. | Liver cancer due to alcohol use  |
| India   | 1993                                      | 1999 | Sarin SK, Thakur V, Guptan RC, Saigal S, Malhotra V, Thyagarajan SP, Das BC. Profile of hepatocellular carcinoma in India: an insight into the possible etiologic associations. J Gastroenterol Hepatol. 2001; 16(6): 666-73. | Liver cancer due to hepatitis B  |
| India   | 1993                                      | 1999 | Sarin SK, Thakur V, Guptan RC, Saigal S, Malhotra V, Thyagarajan SP, Das BC. Profile of hepatocellular carcinoma in India: an insight into the possible etiologic associations. J Gastroenterol Hepatol. 2001; 16(6): 666-73. | Liver cancer due to hepatitis C  |
| India   | 1993                                      | 1999 | Sarin SK, Thakur V, Guptan RC, Saigal S, Malhotra V, Thyagarajan SP, Das BC. Profile of hepatocellular carcinoma in India: an insight into the possible etiologic associations. J Gastroenterol Hepatol. 2001; 16(6): 666-73. | Liver cancer due to other causes |
| India   | 2007                                      | 2010 | Sood A, Midha V, Goyal O, Goyal P, Sood N, Sharma SK. Profile of hepatocellular carcinoma in a tertiary care hospital in Punjab in northern India. Indian J Gastroenterol. 2014; 33(1): 35-40.                                | Liver cancer due to alcohol use  |
| India   | 2007                                      | 2010 | Sood A, Midha V, Goyal O, Goyal P, Sood N, Sharma SK. Profile of hepatocellular carcinoma in a tertiary care hospital in Punjab in northern India. Indian J Gastroenterol. 2014; 33(1): 35-40.                                | Liver cancer due to hepatitis B  |
| India   | 2007                                      | 2010 | Sood A, Midha V, Goyal O, Goyal P, Sood N, Sharma SK. Profile of hepatocellular carcinoma in a tertiary care hospital in Punjab in northern India. Indian J Gastroenterol. 2014; 33(1): 35-40.                                | Liver cancer due to hepatitis C  |
| India   | 2007                                      | 2010 | Sood A, Midha V, Goyal O, Goyal P, Sood N, Sharma SK. Profile of hepatocellular carcinoma in a tertiary care hospital in Punjab in northern India. Indian J Gastroenterol. 2014; 33(1): 35-40.                                | Liver cancer due to other        |

| Country   | Years included in estimation (start, end) |      | Citation                                                                                                                                                                                                                                                                                                          | Liver cancer etiology            |
|-----------|-------------------------------------------|------|-------------------------------------------------------------------------------------------------------------------------------------------------------------------------------------------------------------------------------------------------------------------------------------------------------------------|----------------------------------|
|           |                                           |      |                                                                                                                                                                                                                                                                                                                   | causes                           |
| India     | 2000                                      | 2002 | Wang B-E, Ma W-M, Sulaiman A, Noer S, Sumoharjo S, Sumarsidi D, Tandon BN, Nakao K, Mishiro S, Miyakawa Y, Akahane Y, Suzuki H. Demographic, clinical, and virological characteristics of hepatocellular carcinoma in Asia: survey of 414 patients from four countries. <i>J Med Virol.</i> 2002; 67(3): 394-400. | Liver cancer due to hepatitis B  |
| India     | 2000                                      | 2002 | Wang B-E, Ma W-M, Sulaiman A, Noer S, Sumoharjo S, Sumarsidi D, Tandon BN, Nakao K, Mishiro S, Miyakawa Y, Akahane Y, Suzuki H. Demographic, clinical, and virological characteristics of hepatocellular carcinoma in Asia: survey of 414 patients from four countries. <i>J Med Virol.</i> 2002; 67(3): 394-400. | Liver cancer due to hepatitis C  |
| India     | 2000                                      | 2002 | Wang B-E, Ma W-M, Sulaiman A, Noer S, Sumoharjo S, Sumarsidi D, Tandon BN, Nakao K, Mishiro S, Miyakawa Y, Akahane Y, Suzuki H. Demographic, clinical, and virological characteristics of hepatocellular carcinoma in Asia: survey of 414 patients from four countries. <i>J Med Virol.</i> 2002; 67(3): 394-400. | Liver cancer due to other causes |
| Indonesia | 1991                                      | 1993 | Hadiwandowo S, Tsuda F, Okamoto H, Tokita H, Wang Y, Tanaka T, Miyakawa Y, Mayumi M. Hepatitis B virus subtypes and hepatitis C virus genotypes in patients with chronic liver disease or on maintenance hemodialysis in Indonesia. <i>J Med Virol.</i> 1994; 43(2): 182-6.                                       | Liver cancer due to hepatitis B  |
| Indonesia | 1991                                      | 1993 | Hadiwandowo S, Tsuda F, Okamoto H, Tokita H, Wang Y, Tanaka T, Miyakawa Y, Mayumi M. Hepatitis B virus subtypes and hepatitis C virus genotypes in patients with chronic liver disease or on maintenance hemodialysis in Indonesia. <i>J Med Virol.</i> 1994; 43(2): 182-6.                                       | Liver cancer due to hepatitis C  |
| Indonesia | 2000                                      | 2002 | Wang B-E, Ma W-M, Sulaiman A, Noer S, Sumoharjo S, Sumarsidi D, Tandon BN, Nakao K, Mishiro S, Miyakawa Y, Akahane Y, Suzuki H. Demographic, clinical, and virological characteristics of hepatocellular carcinoma in Asia: survey of 414 patients from four countries. <i>J Med Virol.</i> 2002; 67(3): 394-400. | Liver cancer due to hepatitis B  |
| Indonesia | 2000                                      | 2002 | Wang B-E, Ma W-M, Sulaiman A, Noer S, Sumoharjo S, Sumarsidi D, Tandon BN, Nakao K, Mishiro S, Miyakawa Y, Akahane Y, Suzuki H. Demographic, clinical, and virological characteristics of hepatocellular carcinoma in Asia: survey of 414 patients from four countries. <i>J Med Virol.</i> 2002; 67(3): 394-400. | Liver cancer due to hepatitis C  |
| Iran      | 1999                                      | 2004 | Hajiani E, Masjedizadeh R, Hashemi J, Azmi M, Rajabi T. Risk factors for hepatocellular carcinoma in Southern Iran. <i>Saudi Med J.</i> 2005; 26(6): 974-7.                                                                                                                                                       | Liver cancer due to alcohol use  |
| Iran      | 1999                                      | 2004 | Hajiani E, Masjedizadeh R, Hashemi J, Azmi M, Rajabi T. Risk factors for hepatocellular                                                                                                                                                                                                                           | Liver cancer                     |



| Country | Years included in estimation (start, end) |      | Citation                                                                                                                                                                                                                                                                                                                     | Liver cancer etiology            |
|---------|-------------------------------------------|------|------------------------------------------------------------------------------------------------------------------------------------------------------------------------------------------------------------------------------------------------------------------------------------------------------------------------------|----------------------------------|
|         |                                           |      | carcinoma in Southern Iran. Saudi Med J. 2005; 26(6): 974-7.                                                                                                                                                                                                                                                                 | due to hepatitis B               |
| Iran    | 1999                                      | 2004 | Hajiani E, Masjedizadeh R, Hashemi J, Azmi M, Rajabi T. Risk factors for hepatocellular carcinoma in Southern Iran. Saudi Med J. 2005; 26(6): 974-7.                                                                                                                                                                         | Liver cancer due to hepatitis C  |
| Iran    | 1999                                      | 2004 | Hajiani E, Masjedizadeh R, Hashemi J, Azmi M, Rajabi T. Risk factors for hepatocellular carcinoma in Southern Iran. Saudi Med J. 2005; 26(6): 974-7.                                                                                                                                                                         | Liver cancer due to other causes |
| Italy   | 1995                                      | 1997 | Chiesa R, Donato F, Tagger A, Favret M, Ribero ML, Nardi G, Gelatti U, Bucella E, Tomasi E, Portolani N, Bonetti M, Bettini L, Pelizzari G, Salmi A, Savio A, Garatti M, Callea F. Etiology of hepatocellular carcinoma in Italian patients with and without cirrhosis. Cancer Epidemiol Biomarkers Prev. 2000; 9(2): 213-6. | Liver cancer due to alcohol use  |
| Italy   | 1995                                      | 1997 | Chiesa R, Donato F, Tagger A, Favret M, Ribero ML, Nardi G, Gelatti U, Bucella E, Tomasi E, Portolani N, Bonetti M, Bettini L, Pelizzari G, Salmi A, Savio A, Garatti M, Callea F. Etiology of hepatocellular carcinoma in Italian patients with and without cirrhosis. Cancer Epidemiol Biomarkers Prev. 2000; 9(2): 213-6. | Liver cancer due to hepatitis B  |
| Italy   | 1995                                      | 1997 | Chiesa R, Donato F, Tagger A, Favret M, Ribero ML, Nardi G, Gelatti U, Bucella E, Tomasi E, Portolani N, Bonetti M, Bettini L, Pelizzari G, Salmi A, Savio A, Garatti M, Callea F. Etiology of hepatocellular carcinoma in Italian patients with and without cirrhosis. Cancer Epidemiol Biomarkers Prev. 2000; 9(2): 213-6. | Liver cancer due to hepatitis C  |
| Italy   | 1995                                      | 1997 | Chiesa R, Donato F, Tagger A, Favret M, Ribero ML, Nardi G, Gelatti U, Bucella E, Tomasi E, Portolani N, Bonetti M, Bettini L, Pelizzari G, Salmi A, Savio A, Garatti M, Callea F. Etiology of hepatocellular carcinoma in Italian patients with and without cirrhosis. Cancer Epidemiol Biomarkers Prev. 2000; 9(2): 213-6. | Liver cancer due to other causes |
| Italy   | 1995                                      | 1996 | Donato F, Tagger A, Chiesa R, Ribero ML, Tomasoni V, Fasola M, Gelatti U, Portera G, Boffetta P, Nardi G. Hepatitis B and C virus infection, alcohol drinking, and hepatocellular carcinoma: a case-control study in Italy. Brescia HCC Study. Hepatology. 1997; 26(3): 579-84.                                              | Liver cancer due to hepatitis B  |
| Italy   | 1995                                      | 1996 | Donato F, Tagger A, Chiesa R, Ribero ML, Tomasoni V, Fasola M, Gelatti U, Portera G, Boffetta P, Nardi G. Hepatitis B and C virus infection, alcohol drinking, and hepatocellular carcinoma: a case-control study in Italy. Brescia HCC Study. Hepatology. 1997; 26(3): 579-84.                                              | Liver cancer due to hepatitis C  |
| Italy   | 1999                                      | 2002 | Franceschi S, Montella M, Polesel J, La Vecchia C, Crispo A, Dal Maso L, Casarin P, Izzo F,                                                                                                                                                                                                                                  | Liver cancer                     |

| Country | Years included in estimation (start, end) |      | Citation                                                                                                                                                                                                                                                                                                      | Liver cancer etiology            |
|---------|-------------------------------------------|------|---------------------------------------------------------------------------------------------------------------------------------------------------------------------------------------------------------------------------------------------------------------------------------------------------------------|----------------------------------|
|         |                                           |      | Tommasi LG, Chemin I, Trépo C, Crovatto M, Talamini R. Hepatitis viruses, alcohol, and tobacco in the etiology of hepatocellular carcinoma in Italy. <i>Cancer Epidemiol Biomarkers Prev.</i> 2006; 15(4): 683-9.                                                                                             | due to alcohol use               |
| Italy   | 1999                                      | 2002 | Franceschi S, Montella M, Polesel J, La Vecchia C, Crispo A, Dal Maso L, Casarin P, Izzo F, Tommasi LG, Chemin I, Trépo C, Crovatto M, Talamini R. Hepatitis viruses, alcohol, and tobacco in the etiology of hepatocellular carcinoma in Italy. <i>Cancer Epidemiol Biomarkers Prev.</i> 2006; 15(4): 683-9. | Liver cancer due to hepatitis B  |
| Italy   | 1999                                      | 2002 | Franceschi S, Montella M, Polesel J, La Vecchia C, Crispo A, Dal Maso L, Casarin P, Izzo F, Tommasi LG, Chemin I, Trépo C, Crovatto M, Talamini R. Hepatitis viruses, alcohol, and tobacco in the etiology of hepatocellular carcinoma in Italy. <i>Cancer Epidemiol Biomarkers Prev.</i> 2006; 15(4): 683-9. | Liver cancer due to hepatitis C  |
| Italy   | 1999                                      | 2002 | Franceschi S, Montella M, Polesel J, La Vecchia C, Crispo A, Dal Maso L, Casarin P, Izzo F, Tommasi LG, Chemin I, Trépo C, Crovatto M, Talamini R. Hepatitis viruses, alcohol, and tobacco in the etiology of hepatocellular carcinoma in Italy. <i>Cancer Epidemiol Biomarkers Prev.</i> 2006; 15(4): 683-9. | Liver cancer due to hepatitis C  |
| Italy   | 1999                                      | 2002 | Franceschi S, Montella M, Polesel J, La Vecchia C, Crispo A, Dal Maso L, Casarin P, Izzo F, Tommasi LG, Chemin I, Trépo C, Crovatto M, Talamini R. Hepatitis viruses, alcohol, and tobacco in the etiology of hepatocellular carcinoma in Italy. <i>Cancer Epidemiol Biomarkers Prev.</i> 2006; 15(4): 683-9. | Liver cancer due to other causes |
| Italy   | 1995                                      | 1998 | Gelatti U, Donato F, Tagger A, Fantoni C, Portolani N, Ribero ML, Martelli C, Trevisi P, Covolo L, Simonati C, Nardi G, Brescia HCC Study. Etiology of hepatocellular carcinoma influences clinical and pathologic features but not patient survival. <i>Am J Gastroenterol.</i> 2003; 98(4): 907-14.         | Liver cancer due to alcohol use  |
| Italy   | 1995                                      | 1998 | Gelatti U, Donato F, Tagger A, Fantoni C, Portolani N, Ribero ML, Martelli C, Trevisi P, Covolo L, Simonati C, Nardi G, Brescia HCC Study. Etiology of hepatocellular carcinoma influences clinical and pathologic features but not patient survival. <i>Am J Gastroenterol.</i> 2003; 98(4): 907-14.         | Liver cancer due to hepatitis B  |
| Italy   | 1995                                      | 1998 | Gelatti U, Donato F, Tagger A, Fantoni C, Portolani N, Ribero ML, Martelli C, Trevisi P, Covolo L, Simonati C, Nardi G, Brescia HCC Study. Etiology of hepatocellular carcinoma influences clinical and pathologic features but not patient survival. <i>Am J Gastroenterol.</i> 2003; 98(4): 907-14.         | Liver cancer due to hepatitis C  |
| Italy   | 1995                                      | 1998 | Gelatti U, Donato F, Tagger A, Fantoni C, Portolani N, Ribero ML, Martelli C, Trevisi P, Covolo L, Simonati C, Nardi G, Brescia HCC Study. Etiology of hepatocellular carcinoma influences clinical and pathologic features but not patient survival. <i>Am J Gastroenterol.</i> 2003; 98(4): 907-14.         | Liver cancer due to other causes |

| Country | Years included in estimation (start, end) |      | Citation                                                                                                                                                                                                                                                                                                                                 | Liver cancer etiology            |
|---------|-------------------------------------------|------|------------------------------------------------------------------------------------------------------------------------------------------------------------------------------------------------------------------------------------------------------------------------------------------------------------------------------------------|----------------------------------|
| Italy   | 2001                                      | 2001 | Sagnelli E, Stroffolini T, Mele A, Almasio P, Coppola N, Ferrigno L, Scolastico C, Onofrio M, Imperato M, Filippini P. The importance of HCV on the burden of chronic liver disease in Italy: a multicenter prevalence study of 9,997 cases. <i>J Med Virol.</i> 2005; 75(4): 522-7.                                                     | Liver cancer due to alcohol use  |
| Italy   | 2001                                      | 2001 | Sagnelli E, Stroffolini T, Mele A, Almasio P, Coppola N, Ferrigno L, Scolastico C, Onofrio M, Imperato M, Filippini P. The importance of HCV on the burden of chronic liver disease in Italy: a multicenter prevalence study of 9,997 cases. <i>J Med Virol.</i> 2005; 75(4): 522-7.                                                     | Liver cancer due to hepatitis B  |
| Italy   | 2001                                      | 2001 | Sagnelli E, Stroffolini T, Mele A, Almasio P, Coppola N, Ferrigno L, Scolastico C, Onofrio M, Imperato M, Filippini P. The importance of HCV on the burden of chronic liver disease in Italy: a multicenter prevalence study of 9,997 cases. <i>J Med Virol.</i> 2005; 75(4): 522-7.                                                     | Liver cancer due to hepatitis C  |
| Italy   | 2001                                      | 2001 | Sagnelli E, Stroffolini T, Mele A, Almasio P, Coppola N, Ferrigno L, Scolastico C, Onofrio M, Imperato M, Filippini P. The importance of HCV on the burden of chronic liver disease in Italy: a multicenter prevalence study of 9,997 cases. <i>J Med Virol.</i> 2005; 75(4): 522-7.                                                     | Liver cancer due to other causes |
| Italy   | 1987                                      | 1996 | Santi V, Buccione D, Di Micoli A, Fatti G, Frigerio M, Farinati F, Del Poggio P, Rapaccini G, Di Nolfo MA, Benvegnù L, Zoli M, Borzio F, Giannini EG, Caturelli E, Chiaramonte M, Bernardi M, Trevisani F. The changing scenario of hepatocellular carcinoma over the last two decades in Italy. <i>J Hepatol.</i> 2012; 56(2): 397-405. | Liver cancer due to alcohol use  |
| Italy   | 1987                                      | 1996 | Santi V, Buccione D, Di Micoli A, Fatti G, Frigerio M, Farinati F, Del Poggio P, Rapaccini G, Di Nolfo MA, Benvegnù L, Zoli M, Borzio F, Giannini EG, Caturelli E, Chiaramonte M, Bernardi M, Trevisani F. The changing scenario of hepatocellular carcinoma over the last two decades in Italy. <i>J Hepatol.</i> 2012; 56(2): 397-405. | Liver cancer due to hepatitis B  |
| Italy   | 1987                                      | 1996 | Santi V, Buccione D, Di Micoli A, Fatti G, Frigerio M, Farinati F, Del Poggio P, Rapaccini G, Di Nolfo MA, Benvegnù L, Zoli M, Borzio F, Giannini EG, Caturelli E, Chiaramonte M, Bernardi M, Trevisani F. The changing scenario of hepatocellular carcinoma over the last two decades in Italy. <i>J Hepatol.</i> 2012; 56(2): 397-405. | Liver cancer due to hepatitis C  |
| Italy   | 1987                                      | 1996 | Santi V, Buccione D, Di Micoli A, Fatti G, Frigerio M, Farinati F, Del Poggio P, Rapaccini G, Di Nolfo MA, Benvegnù L, Zoli M, Borzio F, Giannini EG, Caturelli E, Chiaramonte M, Bernardi M, Trevisani F. The changing scenario of hepatocellular carcinoma over the last two decades in Italy. <i>J Hepatol.</i> 2012; 56(2): 397-405. | Liver cancer due to other causes |
| Italy   | 1997                                      | 2001 | Santi V, Buccione D, Di Micoli A, Fatti G, Frigerio M, Farinati F, Del Poggio P, Rapaccini G, Di Nolfo MA, Benvegnù L, Zoli M, Borzio F, Giannini EG, Caturelli E, Chiaramonte M, Bernardi M, Trevisani F. The changing scenario of hepatocellular carcinoma over the last two decades in                                                | Liver cancer due to alcohol use  |

| Country | Years included in estimation (start, end) |      | Citation                                                                                                                                                                                                                                                                                                                          | Liver cancer etiology            |
|---------|-------------------------------------------|------|-----------------------------------------------------------------------------------------------------------------------------------------------------------------------------------------------------------------------------------------------------------------------------------------------------------------------------------|----------------------------------|
|         |                                           |      | Italy. J Hepatol. 2012; 56(2): 397-405.                                                                                                                                                                                                                                                                                           |                                  |
| Italy   | 1997                                      | 2001 | Santi V, Buccione D, Di Micoli A, Fatti G, Frigerio M, Farinati F, Del Poggio P, Rapaccini G, Di Nolfo MA, Benvegnù L, Zoli M, Borzio F, Giannini EG, Caturelli E, Chiaramonte M, Bernardi M, Trevisani F. The changing scenario of hepatocellular carcinoma over the last two decades in Italy. J Hepatol. 2012; 56(2): 397-405. | Liver cancer due to hepatitis B  |
| Italy   | 1997                                      | 2001 | Santi V, Buccione D, Di Micoli A, Fatti G, Frigerio M, Farinati F, Del Poggio P, Rapaccini G, Di Nolfo MA, Benvegnù L, Zoli M, Borzio F, Giannini EG, Caturelli E, Chiaramonte M, Bernardi M, Trevisani F. The changing scenario of hepatocellular carcinoma over the last two decades in Italy. J Hepatol. 2012; 56(2): 397-405. | Liver cancer due to hepatitis C  |
| Italy   | 1997                                      | 2001 | Santi V, Buccione D, Di Micoli A, Fatti G, Frigerio M, Farinati F, Del Poggio P, Rapaccini G, Di Nolfo MA, Benvegnù L, Zoli M, Borzio F, Giannini EG, Caturelli E, Chiaramonte M, Bernardi M, Trevisani F. The changing scenario of hepatocellular carcinoma over the last two decades in Italy. J Hepatol. 2012; 56(2): 397-405. | Liver cancer due to other causes |
| Italy   | 2002                                      | 2008 | Santi V, Buccione D, Di Micoli A, Fatti G, Frigerio M, Farinati F, Del Poggio P, Rapaccini G, Di Nolfo MA, Benvegnù L, Zoli M, Borzio F, Giannini EG, Caturelli E, Chiaramonte M, Bernardi M, Trevisani F. The changing scenario of hepatocellular carcinoma over the last two decades in Italy. J Hepatol. 2012; 56(2): 397-405. | Liver cancer due to alcohol use  |
| Italy   | 2002                                      | 2008 | Santi V, Buccione D, Di Micoli A, Fatti G, Frigerio M, Farinati F, Del Poggio P, Rapaccini G, Di Nolfo MA, Benvegnù L, Zoli M, Borzio F, Giannini EG, Caturelli E, Chiaramonte M, Bernardi M, Trevisani F. The changing scenario of hepatocellular carcinoma over the last two decades in Italy. J Hepatol. 2012; 56(2): 397-405. | Liver cancer due to hepatitis B  |
| Italy   | 2002                                      | 2008 | Santi V, Buccione D, Di Micoli A, Fatti G, Frigerio M, Farinati F, Del Poggio P, Rapaccini G, Di Nolfo MA, Benvegnù L, Zoli M, Borzio F, Giannini EG, Caturelli E, Chiaramonte M, Bernardi M, Trevisani F. The changing scenario of hepatocellular carcinoma over the last two decades in Italy. J Hepatol. 2012; 56(2): 397-405. | Liver cancer due to hepatitis C  |
| Italy   | 2002                                      | 2008 | Santi V, Buccione D, Di Micoli A, Fatti G, Frigerio M, Farinati F, Del Poggio P, Rapaccini G, Di Nolfo MA, Benvegnù L, Zoli M, Borzio F, Giannini EG, Caturelli E, Chiaramonte M, Bernardi M, Trevisani F. The changing scenario of hepatocellular carcinoma over the last two decades in Italy. J Hepatol. 2012; 56(2): 397-405. | Liver cancer due to other causes |
| Italy   | 1993                                      | 1998 | Soresi M, La Spada E, Giannitrapani L, Campagna E, Di Gesaro V, Granà W, Sandonato L, Brancatelli G, Rotolo G, Affronti A, Messina S, Montalto G. Hepatocellular carcinoma:                                                                                                                                                       | Liver cancer due to              |

| Country | Years included in estimation (start, end) |      | Citation                                                                                                                                                                                                                                                                                                                                     | Liver cancer etiology            |
|---------|-------------------------------------------|------|----------------------------------------------------------------------------------------------------------------------------------------------------------------------------------------------------------------------------------------------------------------------------------------------------------------------------------------------|----------------------------------|
|         |                                           |      | comparison of two different periods at the same center. Eur J Intern Med. 2010; 21(2): 127-30.                                                                                                                                                                                                                                               | hepatitis B                      |
| Italy   | 1993                                      | 1998 | Soresi M, La Spada E, Giannitrapani L, Campagna E, Di Gesaro V, Granà W, Sandonato L, Brancatelli G, Rotolo G, Affronti A, Messina S, Montalto G. Hepatocellular carcinoma: comparison of two different periods at the same center. Eur J Intern Med. 2010; 21(2): 127-30.                                                                   | Liver cancer due to hepatitis C  |
| Italy   | 2003                                      | 2008 | Soresi M, La Spada E, Giannitrapani L, Campagna E, Di Gesaro V, Granà W, Sandonato L, Brancatelli G, Rotolo G, Affronti A, Messina S, Montalto G. Hepatocellular carcinoma: comparison of two different periods at the same center. Eur J Intern Med. 2010; 21(2): 127-30.                                                                   | Liver cancer due to hepatitis B  |
| Italy   | 2003                                      | 2008 | Soresi M, La Spada E, Giannitrapani L, Campagna E, Di Gesaro V, Granà W, Sandonato L, Brancatelli G, Rotolo G, Affronti A, Messina S, Montalto G. Hepatocellular carcinoma: comparison of two different periods at the same center. Eur J Intern Med. 2010; 21(2): 127-30.                                                                   | Liver cancer due to hepatitis C  |
| Italy   | 1995                                      | 1998 | Tagger A, Donato F, Ribero ML, Chiesa R, Portera G, Gelatti U, Albertini A, Fasola M, Boffetta P, Nardi G. Case-control study on hepatitis C virus (HCV) as a risk factor for hepatocellular carcinoma: the role of HCV genotypes and the synergism with hepatitis B virus and alcohol. Brescia HCC Study. Int J Cancer. 1999; 81(5): 695-9. | Liver cancer due to hepatitis B  |
| Italy   | 1995                                      | 1998 | Tagger A, Donato F, Ribero ML, Chiesa R, Portera G, Gelatti U, Albertini A, Fasola M, Boffetta P, Nardi G. Case-control study on hepatitis C virus (HCV) as a risk factor for hepatocellular carcinoma: the role of HCV genotypes and the synergism with hepatitis B virus and alcohol. Brescia HCC Study. Int J Cancer. 1999; 81(5): 695-9. | Liver cancer due to hepatitis C  |
| Italy   | 1989                                      | 2009 | Zani C, Pasquale L, Bressanelli M, Puoti M, Paris B, Coccaglio R, Lascioli I, Pieriaci G, Donato F. The epidemiological pattern of chronic liver diseases in a community undergoing voluntary screening for hepatitis B and C. Dig Liver Dis. 2011; 43(8): 653-8.                                                                            | Liver cancer due to alcohol use  |
| Italy   | 1989                                      | 2009 | Zani C, Pasquale L, Bressanelli M, Puoti M, Paris B, Coccaglio R, Lascioli I, Pieriaci G, Donato F. The epidemiological pattern of chronic liver diseases in a community undergoing voluntary screening for hepatitis B and C. Dig Liver Dis. 2011; 43(8): 653-8.                                                                            | Liver cancer due to hepatitis B  |
| Italy   | 1989                                      | 2009 | Zani C, Pasquale L, Bressanelli M, Puoti M, Paris B, Coccaglio R, Lascioli I, Pieriaci G, Donato F. The epidemiological pattern of chronic liver diseases in a community undergoing voluntary screening for hepatitis B and C. Dig Liver Dis. 2011; 43(8): 653-8.                                                                            | Liver cancer due to hepatitis C  |
| Italy   | 1989                                      | 2009 | Zani C, Pasquale L, Bressanelli M, Puoti M, Paris B, Coccaglio R, Lascioli I, Pieriaci G, Donato F. The epidemiological pattern of chronic liver diseases in a community undergoing voluntary screening for hepatitis B and C. Dig Liver Dis. 2011; 43(8): 653-8.                                                                            | Liver cancer due to other causes |
| Japan   | 1982                                      | 2007 | Akahoshi H, Taura N, Ichikawa T, Miyaaki H, Akiyama M, Miuma S, Ozawa E, Takeshita S,                                                                                                                                                                                                                                                        | Liver cancer                     |

| Country | Years included in estimation (start, end) |      | Citation                                                                                                                                                                                                                                                                                                             | Liver cancer etiology            |
|---------|-------------------------------------------|------|----------------------------------------------------------------------------------------------------------------------------------------------------------------------------------------------------------------------------------------------------------------------------------------------------------------------|----------------------------------|
|         |                                           |      | Muraoka T, Matsuzaki T, Ohtani M, Isomoto H, Matsumoto T, Takeshima F, Nakao K. Differences in prognostic factors according to viral status in patients with hepatocellular carcinoma. <i>Oncol Rep.</i> 2010; 23(5): 1317-23.                                                                                       | due to alcohol use               |
| Japan   | 1982                                      | 2007 | Akahoshi H, Taura N, Ichikawa T, Miyaaki H, Akiyama M, Miuma S, Ozawa E, Takeshita S, Muraoka T, Matsuzaki T, Ohtani M, Isomoto H, Matsumoto T, Takeshima F, Nakao K. Differences in prognostic factors according to viral status in patients with hepatocellular carcinoma. <i>Oncol Rep.</i> 2010; 23(5): 1317-23. | Liver cancer due to hepatitis B  |
| Japan   | 1982                                      | 2007 | Akahoshi H, Taura N, Ichikawa T, Miyaaki H, Akiyama M, Miuma S, Ozawa E, Takeshita S, Muraoka T, Matsuzaki T, Ohtani M, Isomoto H, Matsumoto T, Takeshima F, Nakao K. Differences in prognostic factors according to viral status in patients with hepatocellular carcinoma. <i>Oncol Rep.</i> 2010; 23(5): 1317-23. | Liver cancer due to hepatitis C  |
| Japan   | 1982                                      | 2007 | Akahoshi H, Taura N, Ichikawa T, Miyaaki H, Akiyama M, Miuma S, Ozawa E, Takeshita S, Muraoka T, Matsuzaki T, Ohtani M, Isomoto H, Matsumoto T, Takeshima F, Nakao K. Differences in prognostic factors according to viral status in patients with hepatocellular carcinoma. <i>Oncol Rep.</i> 2010; 23(5): 1317-23. | Liver cancer due to other causes |
| Japan   | 1994                                      | 1994 | Koide T, Ohno T, Huang XE, Iijima Y, Sugihara K, Mizokami M, Xiang J, Tokudome S. HBV/HCV Infection, Alcohol, Tobacco and Genetic Polymorphisms for Hepatocellular Carcinoma in Nagoya, Japan. <i>Asian Pac J Cancer Prev.</i> 2000; 1(3): 237-43.                                                                   | Liver cancer due to hepatitis B  |
| Japan   | 1994                                      | 1994 | Koide T, Ohno T, Huang XE, Iijima Y, Sugihara K, Mizokami M, Xiang J, Tokudome S. HBV/HCV Infection, Alcohol, Tobacco and Genetic Polymorphisms for Hepatocellular Carcinoma in Nagoya, Japan. <i>Asian Pac J Cancer Prev.</i> 2000; 1(3): 237-43.                                                                   | Liver cancer due to hepatitis C  |
| Japan   | 1990                                      | 1997 | Kubo S, Nishiguchi S, Hirohashi K, Tanaka H, Tsukamoto T, Hamba H, Shuto T, Okuda T, Tamori A, Kuroki T, Kinoshita H. High prevalence of infection with hepatitis B and C viruses in patients with hepatocellular carcinoma in Japan. <i>Hepatogastroenterology.</i> 1999; 46(25): 357-9.                            | Liver cancer due to hepatitis B  |
| Japan   | 1990                                      | 1997 | Kubo S, Nishiguchi S, Hirohashi K, Tanaka H, Tsukamoto T, Hamba H, Shuto T, Okuda T, Tamori A, Kuroki T, Kinoshita H. High prevalence of infection with hepatitis B and C viruses in patients with hepatocellular carcinoma in Japan. <i>Hepatogastroenterology.</i> 1999; 46(25): 357-9.                            | Liver cancer due to hepatitis C  |
| Japan   | 2006                                      | 2008 | Michitaka K, Nishiguchi S, Aoyagi Y, Hiasa Y, Tokumoto Y, Onji M, Japan Etiology of Liver Cirrhosis Study Group. Etiology of liver cirrhosis in Japan: a nationwide survey. <i>J Gastroenterol.</i> 2010; 45(1): 86-94.                                                                                              | Liver cancer due to alcohol use  |
| Japan   | 2006                                      | 2008 | Michitaka K, Nishiguchi S, Aoyagi Y, Hiasa Y, Tokumoto Y, Onji M, Japan Etiology of Liver                                                                                                                                                                                                                            | Liver cancer                     |

| Country | Years included in estimation (start, end) |      | Citation                                                                                                                                                                                                                                                                                                      | Liver cancer etiology            |
|---------|-------------------------------------------|------|---------------------------------------------------------------------------------------------------------------------------------------------------------------------------------------------------------------------------------------------------------------------------------------------------------------|----------------------------------|
|         |                                           |      | Cirrhosis Study Group. Etiology of liver cirrhosis in Japan: a nationwide survey. J Gastroenterol. 2010; 45(1): 86-94.                                                                                                                                                                                        | due to hepatitis B               |
| Japan   | 2006                                      | 2008 | Michitaka K, Nishiguchi S, Aoyagi Y, Hiasa Y, Tokumoto Y, Onji M, Japan Etiology of Liver Cirrhosis Study Group. Etiology of liver cirrhosis in Japan: a nationwide survey. J Gastroenterol. 2010; 45(1): 86-94.                                                                                              | Liver cancer due to hepatitis C  |
| Japan   | 2006                                      | 2008 | Michitaka K, Nishiguchi S, Aoyagi Y, Hiasa Y, Tokumoto Y, Onji M, Japan Etiology of Liver Cirrhosis Study Group. Etiology of liver cirrhosis in Japan: a nationwide survey. J Gastroenterol. 2010; 45(1): 86-94.                                                                                              | Liver cancer due to other causes |
| Japan   | 1995                                      | 2009 | Nagaoki Y, Hyogo H, Aikata H, Tanaka M, Naeshiro N, Nakahara T, Honda Y, Miyaki D, Kawaoka T, Takaki S, Hiramatsu A, Waki K, Imamura M, Kawakami Y, Takahashi S, Chayama K. Recent trend of clinical features in patients with hepatocellular carcinoma. Hepatol Res. 2012; 42(4): 368-75.                    | Liver cancer due to alcohol use  |
| Japan   | 1995                                      | 2009 | Nagaoki Y, Hyogo H, Aikata H, Tanaka M, Naeshiro N, Nakahara T, Honda Y, Miyaki D, Kawaoka T, Takaki S, Hiramatsu A, Waki K, Imamura M, Kawakami Y, Takahashi S, Chayama K. Recent trend of clinical features in patients with hepatocellular carcinoma. Hepatol Res. 2012; 42(4): 368-75.                    | Liver cancer due to hepatitis B  |
| Japan   | 1995                                      | 2009 | Nagaoki Y, Hyogo H, Aikata H, Tanaka M, Naeshiro N, Nakahara T, Honda Y, Miyaki D, Kawaoka T, Takaki S, Hiramatsu A, Waki K, Imamura M, Kawakami Y, Takahashi S, Chayama K. Recent trend of clinical features in patients with hepatocellular carcinoma. Hepatol Res. 2012; 42(4): 368-75.                    | Liver cancer due to hepatitis C  |
| Japan   | 1995                                      | 2009 | Nagaoki Y, Hyogo H, Aikata H, Tanaka M, Naeshiro N, Nakahara T, Honda Y, Miyaki D, Kawaoka T, Takaki S, Hiramatsu A, Waki K, Imamura M, Kawakami Y, Takahashi S, Chayama K. Recent trend of clinical features in patients with hepatocellular carcinoma. Hepatol Res. 2012; 42(4): 368-75.                    | Liver cancer due to other causes |
| Japan   | 1990                                      | 1992 | Tanaka H, Imai Y, Hiramatsu N, Ito Y, Imanaka K, Oshita M, Hijioka T, Katayama K, Yabuuchi I, Yoshihara H, Inoue A, Kato M, Takehara T, Tamura S, Kasahara A, Hayashi N, Tsukuma H. Declining incidence of hepatocellular carcinoma in Osaka, Japan, from 1990 to 2003. Ann Intern Med. 2008; 148(11): 820-6. | Liver cancer due to hepatitis B  |
| Japan   | 1990                                      | 1992 | Tanaka H, Imai Y, Hiramatsu N, Ito Y, Imanaka K, Oshita M, Hijioka T, Katayama K, Yabuuchi I, Yoshihara H, Inoue A, Kato M, Takehara T, Tamura S, Kasahara A, Hayashi N, Tsukuma H. Declining incidence of hepatocellular carcinoma in Osaka, Japan, from 1990 to 2003. Ann                                   | Liver cancer due to hepatitis C  |

| Country | Years included in estimation (start, end) |      | Citation                                                                                                                                                                                                                                                                                                      | Liver cancer etiology           |
|---------|-------------------------------------------|------|---------------------------------------------------------------------------------------------------------------------------------------------------------------------------------------------------------------------------------------------------------------------------------------------------------------|---------------------------------|
|         |                                           |      | Intern Med. 2008; 148(11): 820-6.                                                                                                                                                                                                                                                                             |                                 |
| Japan   | 1993                                      | 1995 | Tanaka H, Imai Y, Hiramatsu N, Ito Y, Imanaka K, Oshita M, Hijioka T, Katayama K, Yabuuchi I, Yoshihara H, Inoue A, Kato M, Takehara T, Tamura S, Kasahara A, Hayashi N, Tsukuma H. Declining incidence of hepatocellular carcinoma in Osaka, Japan, from 1990 to 2003. Ann Intern Med. 2008; 148(11): 820-6. | Liver cancer due to hepatitis B |
| Japan   | 1993                                      | 1995 | Tanaka H, Imai Y, Hiramatsu N, Ito Y, Imanaka K, Oshita M, Hijioka T, Katayama K, Yabuuchi I, Yoshihara H, Inoue A, Kato M, Takehara T, Tamura S, Kasahara A, Hayashi N, Tsukuma H. Declining incidence of hepatocellular carcinoma in Osaka, Japan, from 1990 to 2003. Ann Intern Med. 2008; 148(11): 820-6. | Liver cancer due to hepatitis C |
| Japan   | 1996                                      | 1998 | Tanaka H, Imai Y, Hiramatsu N, Ito Y, Imanaka K, Oshita M, Hijioka T, Katayama K, Yabuuchi I, Yoshihara H, Inoue A, Kato M, Takehara T, Tamura S, Kasahara A, Hayashi N, Tsukuma H. Declining incidence of hepatocellular carcinoma in Osaka, Japan, from 1990 to 2003. Ann Intern Med. 2008; 148(11): 820-6. | Liver cancer due to hepatitis B |
| Japan   | 1996                                      | 1998 | Tanaka H, Imai Y, Hiramatsu N, Ito Y, Imanaka K, Oshita M, Hijioka T, Katayama K, Yabuuchi I, Yoshihara H, Inoue A, Kato M, Takehara T, Tamura S, Kasahara A, Hayashi N, Tsukuma H. Declining incidence of hepatocellular carcinoma in Osaka, Japan, from 1990 to 2003. Ann Intern Med. 2008; 148(11): 820-6. | Liver cancer due to hepatitis C |
| Japan   | 1999                                      | 2001 | Tanaka H, Imai Y, Hiramatsu N, Ito Y, Imanaka K, Oshita M, Hijioka T, Katayama K, Yabuuchi I, Yoshihara H, Inoue A, Kato M, Takehara T, Tamura S, Kasahara A, Hayashi N, Tsukuma H. Declining incidence of hepatocellular carcinoma in Osaka, Japan, from 1990 to 2003. Ann Intern Med. 2008; 148(11): 820-6. | Liver cancer due to hepatitis B |
| Japan   | 1999                                      | 2001 | Tanaka H, Imai Y, Hiramatsu N, Ito Y, Imanaka K, Oshita M, Hijioka T, Katayama K, Yabuuchi I, Yoshihara H, Inoue A, Kato M, Takehara T, Tamura S, Kasahara A, Hayashi N, Tsukuma H. Declining incidence of hepatocellular carcinoma in Osaka, Japan, from 1990 to 2003. Ann Intern Med. 2008; 148(11): 820-6. | Liver cancer due to hepatitis C |
| Japan   | 2002                                      | 2003 | Tanaka H, Imai Y, Hiramatsu N, Ito Y, Imanaka K, Oshita M, Hijioka T, Katayama K, Yabuuchi I, Yoshihara H, Inoue A, Kato M, Takehara T, Tamura S, Kasahara A, Hayashi N, Tsukuma H. Declining incidence of hepatocellular carcinoma in Osaka, Japan, from 1990 to 2003. Ann Intern Med. 2008; 148(11): 820-6. | Liver cancer due to hepatitis B |
| Japan   | 2002                                      | 2003 | Tanaka H, Imai Y, Hiramatsu N, Ito Y, Imanaka K, Oshita M, Hijioka T, Katayama K, Yabuuchi I, Yoshihara H, Inoue A, Kato M, Takehara T, Tamura S, Kasahara A, Hayashi N, Tsukuma H.                                                                                                                           | Liver cancer due to             |



| Country | Years included in estimation (start, end) |      | Citation                                                                                                                                                                                                                                                                                                                                                                   | Liver cancer etiology            |
|---------|-------------------------------------------|------|----------------------------------------------------------------------------------------------------------------------------------------------------------------------------------------------------------------------------------------------------------------------------------------------------------------------------------------------------------------------------|----------------------------------|
|         |                                           |      | Declining incidence of hepatocellular carcinoma in Osaka, Japan, from 1990 to 2003. <i>Ann Intern Med.</i> 2008; 148(11): 820-6.                                                                                                                                                                                                                                           | hepatitis C                      |
| Japan   | 1996                                      | 2008 | Taura N, Fukushima N, Yastuhashi H, Takami Y, Seike M, Watanabe H, Mizuta T, Sasaki Y, Nagata K, Tabara A, Komorizono Y, Taketomi A, Matsumoto S, Tamai T, Muro T, Nakao K, Fukuizumi K, Maeshiro T, Inoue O, Sata M. The incidence of hepatocellular carcinoma associated with hepatitis C infection decreased in Kyushu area. <i>Med Sci Monit.</i> 2011; 17(2): PH7-11. | Liver cancer due to hepatitis B  |
| Japan   | 1996                                      | 2008 | Taura N, Fukushima N, Yastuhashi H, Takami Y, Seike M, Watanabe H, Mizuta T, Sasaki Y, Nagata K, Tabara A, Komorizono Y, Taketomi A, Matsumoto S, Tamai T, Muro T, Nakao K, Fukuizumi K, Maeshiro T, Inoue O, Sata M. The incidence of hepatocellular carcinoma associated with hepatitis C infection decreased in Kyushu area. <i>Med Sci Monit.</i> 2011; 17(2): PH7-11. | Liver cancer due to hepatitis C  |
| Japan   | 2006                                      | 2009 | Tokushige K, Hashimoto E, Horie Y, Taniai M, Higuchi S. Hepatocellular carcinoma in Japanese patients with nonalcoholic fatty liver disease, alcoholic liver disease, and chronic liver disease of unknown etiology: report of the nationwide survey. <i>J Gastroenterol.</i> 2011; 46(10): 1230-7.                                                                        | Liver cancer due to alcohol use  |
| Japan   | 2006                                      | 2009 | Tokushige K, Hashimoto E, Horie Y, Taniai M, Higuchi S. Hepatocellular carcinoma in Japanese patients with nonalcoholic fatty liver disease, alcoholic liver disease, and chronic liver disease of unknown etiology: report of the nationwide survey. <i>J Gastroenterol.</i> 2011; 46(10): 1230-7.                                                                        | Liver cancer due to hepatitis B  |
| Japan   | 2006                                      | 2009 | Tokushige K, Hashimoto E, Horie Y, Taniai M, Higuchi S. Hepatocellular carcinoma in Japanese patients with nonalcoholic fatty liver disease, alcoholic liver disease, and chronic liver disease of unknown etiology: report of the nationwide survey. <i>J Gastroenterol.</i> 2011; 46(10): 1230-7.                                                                        | Liver cancer due to hepatitis C  |
| Japan   | 2006                                      | 2009 | Tokushige K, Hashimoto E, Horie Y, Taniai M, Higuchi S. Hepatocellular carcinoma in Japanese patients with nonalcoholic fatty liver disease, alcoholic liver disease, and chronic liver disease of unknown etiology: report of the nationwide survey. <i>J Gastroenterol.</i> 2011; 46(10): 1230-7.                                                                        | Liver cancer due to other causes |
| Japan   | 2000                                      | 2002 | Wang B-E, Ma W-M, Sulaiman A, Noer S, Sumoharjo S, Sumarsidi D, Tandon BN, Nakao K, Mishiro S, Miyakawa Y, Akahane Y, Suzuki H. Demographic, clinical, and virological characteristics of hepatocellular carcinoma in Asia: survey of 414 patients from four countries. <i>J Med Virol.</i> 2002; 67(3): 394-400.                                                          | Liver cancer due to hepatitis B  |
| Japan   | 2000                                      | 2002 | Wang B-E, Ma W-M, Sulaiman A, Noer S, Sumoharjo S, Sumarsidi D, Tandon BN, Nakao K, Mishiro S, Miyakawa Y, Akahane Y, Suzuki H. Demographic, clinical, and virological characteristics of hepatocellular carcinoma in Asia: survey of 414 patients from four countries.                                                                                                    | Liver cancer due to hepatitis C  |

| Country  | Years included in estimation (start, end) |      | Citation                                                                                                                                                                                                                                                                                                   | Liver cancer etiology            |
|----------|-------------------------------------------|------|------------------------------------------------------------------------------------------------------------------------------------------------------------------------------------------------------------------------------------------------------------------------------------------------------------|----------------------------------|
|          |                                           |      | J Med Virol. 2002; 67(3): 394-400.                                                                                                                                                                                                                                                                         |                                  |
| Japan    | 2000                                      | 2002 | Wang B-E, Ma W-M, Sulaiman A, Noer S, Sumoharjo S, Sumarsidi D, Tandon BN, Nakao K, Mishiro S, Miyakawa Y, Akahane Y, Suzuki H. Demographic, clinical, and virological characteristics of hepatocellular carcinoma in Asia: survey of 414 patients from four countries. J Med Virol. 2002; 67(3): 394-400. | Liver cancer due to other causes |
| Japan    | 1993                                      | 1999 | Watabe H, Shiratori Y, Tateishi R, Fujishima T, Akamatsu M, Koike Y, Obi S, Hamamura K, Sato S, Teratani T, Shiina S, Omata M. Clinical features of patients with HCC who are negative for both HBV and HCV markers. Hepatogastroenterology. 2003; 50(54): 2157-60.                                        | Liver cancer due to hepatitis B  |
| Japan    | 1993                                      | 1999 | Watabe H, Shiratori Y, Tateishi R, Fujishima T, Akamatsu M, Koike Y, Obi S, Hamamura K, Sato S, Teratani T, Shiina S, Omata M. Clinical features of patients with HCC who are negative for both HBV and HCV markers. Hepatogastroenterology. 2003; 50(54): 2157-60.                                        | Liver cancer due to hepatitis C  |
| Kenya    | 1992                                      | 1994 | Ilako FM, McLigeyo SO, Riyat MS, Lule GN, Okoth FA, Kaptich D. The prevalence of hepatitis C virus antibodies in renal patients, blood donors and patients with chronic liver disease in Kenya. East Afr Med J. 1995; 72(6): 362-4.                                                                        | Liver cancer due to hepatitis B  |
| Kenya    | 1992                                      | 1994 | Ilako FM, McLigeyo SO, Riyat MS, Lule GN, Okoth FA, Kaptich D. The prevalence of hepatitis C virus antibodies in renal patients, blood donors and patients with chronic liver disease in Kenya. East Afr Med J. 1995; 72(6): 362-4.                                                                        | Liver cancer due to hepatitis C  |
| Lebanon  | 1998                                      | 2003 | Yaghi C, Sharara A-I, Rassam P, Moucari R, Honein K, BouJaoude J, Slim R, Noun R, Abdul-Baki H, Khalifeh M, Ramia S, Sayegh R. Hepatocellular carcinoma in Lebanon: Etiology and prognostic factors associated with short-term survival. World J Gastroenterol. 2006; 12(22): 3575-80.                     | Liver cancer due to alcohol use  |
| Lebanon  | 1998                                      | 2003 | Yaghi C, Sharara A-I, Rassam P, Moucari R, Honein K, BouJaoude J, Slim R, Noun R, Abdul-Baki H, Khalifeh M, Ramia S, Sayegh R. Hepatocellular carcinoma in Lebanon: Etiology and prognostic factors associated with short-term survival. World J Gastroenterol. 2006; 12(22): 3575-80.                     | Liver cancer due to hepatitis B  |
| Lebanon  | 1998                                      | 2003 | Yaghi C, Sharara A-I, Rassam P, Moucari R, Honein K, BouJaoude J, Slim R, Noun R, Abdul-Baki H, Khalifeh M, Ramia S, Sayegh R. Hepatocellular carcinoma in Lebanon: Etiology and prognostic factors associated with short-term survival. World J Gastroenterol. 2006; 12(22): 3575-80.                     | Liver cancer due to hepatitis C  |
| Malaysia | 2006                                      | 2009 | Qua C-S, Goh K-L. Liver cirrhosis in Malaysia: peculiar epidemiology in a multiracial Asian country. J Gastroenterol Hepatol. 2011; 26(8): 1333-7.                                                                                                                                                         | Liver cancer due to              |

| Country  | Years included in estimation (start, end) |      | Citation                                                                                                                                                                                                                                                                             | Liver cancer etiology            |
|----------|-------------------------------------------|------|--------------------------------------------------------------------------------------------------------------------------------------------------------------------------------------------------------------------------------------------------------------------------------------|----------------------------------|
|          |                                           |      |                                                                                                                                                                                                                                                                                      | hepatitis B                      |
| Malaysia | 2006                                      | 2009 | Qua C-S, Goh K-L. Liver cirrhosis in Malaysia: peculiar epidemiology in a multiracial Asian country. <i>J Gastroenterol Hepatol.</i> 2011; 26(8): 1333-7.                                                                                                                            | Liver cancer due to hepatitis C  |
| Malaysia | 2006                                      | 2009 | Qua C-S, Goh K-L. Liver cirrhosis in Malaysia: peculiar epidemiology in a multiracial Asian country. <i>J Gastroenterol Hepatol.</i> 2011; 26(8): 1333-7.                                                                                                                            | Liver cancer due to other causes |
| Mali     | 1998                                      | 1999 | Dembele M, Maïga I, Minta D, Konate A, Diarra M, Sangare D, Traore HA, Maïga MY, Tounkara A, Payan C, Lunel E, Carbonnelle B, Cales P. [Study of antigen HBs and antiviral antibodies of hepatitis C during hepatopathies in Mali]. <i>Bull Soc Pathol Exot.</i> 2004; 97(3): 161-4. | Liver cancer due to hepatitis B  |
| Mali     | 1998                                      | 1999 | Dembele M, Maïga I, Minta D, Konate A, Diarra M, Sangare D, Traore HA, Maïga MY, Tounkara A, Payan C, Lunel E, Carbonnelle B, Cales P. [Study of antigen HBs and antiviral antibodies of hepatitis C during hepatopathies in Mali]. <i>Bull Soc Pathol Exot.</i> 2004; 97(3): 161-4. | Liver cancer due to hepatitis C  |
| Mexico   | 1992                                      | 2002 | Mondragón-Sánchez R, Garduño-López AL, Hernández-Castillo E, Gómez-Gómez E, Ruiz-Molina JM. Hepatocellular carcinoma and hepatitis C in Mexico. <i>Hepatogastroenterology.</i> 2005; 52(64): 1159-62.                                                                                | Liver cancer due to alcohol use  |
| Mexico   | 1992                                      | 2002 | Mondragón-Sánchez R, Garduño-López AL, Hernández-Castillo E, Gómez-Gómez E, Ruiz-Molina JM. Hepatocellular carcinoma and hepatitis C in Mexico. <i>Hepatogastroenterology.</i> 2005; 52(64): 1159-62.                                                                                | Liver cancer due to hepatitis B  |
| Mexico   | 1992                                      | 2002 | Mondragón-Sánchez R, Garduño-López AL, Hernández-Castillo E, Gómez-Gómez E, Ruiz-Molina JM. Hepatocellular carcinoma and hepatitis C in Mexico. <i>Hepatogastroenterology.</i> 2005; 52(64): 1159-62.                                                                                | Liver cancer due to hepatitis C  |
| Mexico   | 1992                                      | 2002 | Mondragón-Sánchez R, Garduño-López AL, Hernández-Castillo E, Gómez-Gómez E, Ruiz-Molina JM. Hepatocellular carcinoma and hepatitis C in Mexico. <i>Hepatogastroenterology.</i> 2005; 52(64): 1159-62.                                                                                | Liver cancer due to other causes |
| Mongolia | 2005                                      | 2005 | Oyunsuren T, Kurbanov F, Tanaka Y, Elkady A, Sanduijav R, Khajidsuren O, Dagvadorj B, Mizokami M. High frequency of hepatocellular carcinoma in Mongolia; association with mono-, or co-infection with hepatitis C, B, and delta viruses. <i>J Med Virol.</i> 2006; 78(12): 1688-95. | Liver cancer due to hepatitis B  |
| Mongolia | 2005                                      | 2005 | Oyunsuren T, Kurbanov F, Tanaka Y, Elkady A, Sanduijav R, Khajidsuren O, Dagvadorj B, Mizokami M. High frequency of hepatocellular carcinoma in Mongolia; association with mono-, or co-infection with hepatitis C, B, and delta viruses. <i>J Med Virol.</i> 2006; 78(12): 1688-95. | Liver cancer due to hepatitis C  |

| Country  | Years included in estimation (start, end) |      | Citation                                                                                                                                                                                                                                                                                        | Liver cancer etiology           |
|----------|-------------------------------------------|------|-------------------------------------------------------------------------------------------------------------------------------------------------------------------------------------------------------------------------------------------------------------------------------------------------|---------------------------------|
| Mongolia | 2004                                      | 2004 | Tsatsralt-Od B, Takahashi M, Nishizawa T, Endo K, Inoue J, Okamoto H. High prevalence of dual or triple infection of hepatitis B, C, and delta viruses among patients with chronic liver disease in Mongolia. <i>J Med Virol.</i> 2005; 77(4): 491-9.                                           | Liver cancer due to hepatitis B |
| Mongolia | 2004                                      | 2004 | Tsatsralt-Od B, Takahashi M, Nishizawa T, Endo K, Inoue J, Okamoto H. High prevalence of dual or triple infection of hepatitis B, C, and delta viruses among patients with chronic liver disease in Mongolia. <i>J Med Virol.</i> 2005; 77(4): 491-9.                                           | Liver cancer due to hepatitis C |
| Nigeria  | 1999                                      | 2005 | Nwokediuko SC, Ijoma UN, Obienu O. Liver Cancer in Enugu, South East Nigeria. <i>Insight Bioinforma.</i> 2011; 1(1): 1-5.                                                                                                                                                                       | Liver cancer due to hepatitis B |
| Nigeria  | 1999                                      | 2005 | Nwokediuko SC, Ijoma UN, Obienu O. Liver Cancer in Enugu, South East Nigeria. <i>Insight Bioinforma.</i> 2011; 1(1): 1-5.                                                                                                                                                                       | Liver cancer due to hepatitis C |
| Nigeria  | 1993                                      | 1994 | Ojo OS, Thursz M, Thomas HC, Ndububa DA, Adeodu OO, Rotimi O, Lawal AA, Durosinmi MA, Akonai AK, Fatusi AO. Hepatitis B virus markers, hepatitis D virus antigen and hepatitis C virus antibodies in Nigerian patients with chronic liver disease. <i>East Afr Med J.</i> 1995; 72(11): 719-21. | Liver cancer due to hepatitis B |
| Nigeria  | 1993                                      | 1994 | Ojo OS, Thursz M, Thomas HC, Ndububa DA, Adeodu OO, Rotimi O, Lawal AA, Durosinmi MA, Akonai AK, Fatusi AO. Hepatitis B virus markers, hepatitis D virus antigen and hepatitis C virus antibodies in Nigerian patients with chronic liver disease. <i>East Afr Med J.</i> 1995; 72(11): 719-21. | Liver cancer due to hepatitis C |
| Nigeria  | 2007                                      | 2008 | Okonkwo UC, Nwosu MN, Ukah C, Okpala OC, Ahaneku JI. The clinical and pathological features of hepatocellular carcinoma in Nnewi, Nigeria. <i>Niger J Med.</i> 2011; 20(3): 366-71.                                                                                                             | Liver cancer due to hepatitis B |
| Nigeria  | 2007                                      | 2008 | Okonkwo UC, Nwosu MN, Ukah C, Okpala OC, Ahaneku JI. The clinical and pathological features of hepatocellular carcinoma in Nnewi, Nigeria. <i>Niger J Med.</i> 2011; 20(3): 366-71.                                                                                                             | Liver cancer due to hepatitis C |
| Nigeria  | 1995                                      | 1995 | Olubuyide IO, Aliyu B, Olaleleye OA, Ola SO, Olawuyi F, Malabu UH, Odemuyiwa SO, Odaibo GN, Cook GC. Hepatitis B and C virus and hepatocellular carcinoma. <i>Trans R Soc Trop Med Hyg.</i> 1997; 91(1): 38-41.                                                                                 | Liver cancer due to hepatitis B |
| Nigeria  | 1995                                      | 1995 | Olubuyide IO, Aliyu B, Olaleleye OA, Ola SO, Olawuyi F, Malabu UH, Odemuyiwa SO, Odaibo GN, Cook GC. Hepatitis B and C virus and hepatocellular carcinoma. <i>Trans R Soc Trop Med Hyg.</i> 1997; 91(1): 38-41.                                                                                 | Liver cancer due to hepatitis C |
| Pakistan | 2005                                      | 2007 | Alam JM, Mahmood SR, Shaheen R, Asghar SS. Hepatitis "B" and "C" viral infections in patients                                                                                                                                                                                                   | Liver cancer                    |

| Country      | Years included in estimation (start, end) |      | Citation                                                                                                                                                                                                                                           | Liver cancer etiology           |
|--------------|-------------------------------------------|------|----------------------------------------------------------------------------------------------------------------------------------------------------------------------------------------------------------------------------------------------------|---------------------------------|
|              |                                           |      | with hepatocellular carcinoma. Pak J Pharmacol. 2009; 26(2): 25-32.                                                                                                                                                                                | due to hepatitis B              |
| Pakistan     | 2005                                      | 2007 | Alam JM, Mahmood SR, Shaheen R, Asghar SS. Hepatitis "B" and "C" viral infections in patients with hepatocellular carcinoma. Pak J Pharmacol. 2009; 26(2): 25-32.                                                                                  | Liver cancer due to hepatitis C |
| Pakistan     | 2006                                      | 2007 | Khan A, Tanaka Y, Azam Z, Abbas Z, Kurbanov F, Saleem U, Hamid S, Jafri W, Mizokami M. Epidemic spread of hepatitis C virus genotype 3a and relation to high incidence of hepatocellular carcinoma in Pakistan. J Med Virol. 2009; 81(7): 1189-97. | Liver cancer due to hepatitis B |
| Pakistan     | 2006                                      | 2007 | Khan A, Tanaka Y, Azam Z, Abbas Z, Kurbanov F, Saleem U, Hamid S, Jafri W, Mizokami M. Epidemic spread of hepatitis C virus genotype 3a and relation to high incidence of hepatocellular carcinoma in Pakistan. J Med Virol. 2009; 81(7): 1189-97. | Liver cancer due to hepatitis C |
| Pakistan     | 1994                                      | 2000 | Khokhar N. Spectrum of chronic liver disease in a tertiary care hospital. J Pak Med Assoc. 2002; 52(2): 56-8.                                                                                                                                      | Liver cancer due to hepatitis B |
| Pakistan     | 1994                                      | 2000 | Khokhar N. Spectrum of chronic liver disease in a tertiary care hospital. J Pak Med Assoc. 2002; 52(2): 56-8.                                                                                                                                      | Liver cancer due to hepatitis C |
| Peru         | 1995                                      | 1998 | Ruiz E, Almonte M M, Pizarro R, Celis J, Montalbelti JA, Urbano R. [Hepatitis B and C virus infection as risk factors for hepatocarcinoma in Peru: case and control study]. Rev Gastroenterol Peru. 1998; 18(3): 199-212.                          | Liver cancer due to hepatitis B |
| Peru         | 1995                                      | 1998 | Ruiz E, Almonte M M, Pizarro R, Celis J, Montalbelti JA, Urbano R. [Hepatitis B and C virus infection as risk factors for hepatocarcinoma in Peru: case and control study]. Rev Gastroenterol Peru. 1998; 18(3): 199-212.                          | Liver cancer due to hepatitis C |
| Saudi Arabia | 1995                                      | 1998 | Ayoola EA, Gadour MOEH. Hepatocellular carcinoma in Saudi Arabia: role of hepatitis B and C infection. J Gastroenterol Hepatol. 2004; 19(6): 665-9.                                                                                                | Liver cancer due to hepatitis B |
| Saudi Arabia | 1995                                      | 1998 | Ayoola EA, Gadour MOEH. Hepatocellular carcinoma in Saudi Arabia: role of hepatitis B and C infection. J Gastroenterol Hepatol. 2004; 19(6): 665-9.                                                                                                | Liver cancer due to hepatitis C |
| Senegal      | 1995                                      | 1995 | Mbaye PS, Renaudineau Y, Diallo A, Haudrechy D, Sane M, Michel G, Raphenon G, Klotz F. [Hepatitis C virus and chronic hepatopathies in Dakar: case-control study]. Med Trop (Mars).                                                                | Liver cancer due to             |

| Country      | Years included in estimation (start, end) |      | Citation                                                                                                                                                                                                  | Liver cancer etiology           |
|--------------|-------------------------------------------|------|-----------------------------------------------------------------------------------------------------------------------------------------------------------------------------------------------------------|---------------------------------|
|              |                                           |      | 2000; 60(1): 47-52.                                                                                                                                                                                       | hepatitis B                     |
| Senegal      | 1995                                      | 1995 | Mbaye PS, Renaudineau Y, Diallo A, Haudrechy D, Sane M, Michel G, Raphenon G, Klotz F. [Hepatitis C virus and chronic hepatopathies in Dakar: case-control study]. Med Trop (Mars). 2000; 60(1): 47-52.   | Liver cancer due to hepatitis C |
| Serbia       | 2004                                      | 2007 | Kanazir M, Boricic I, Delic D, Tepavcevic DK, Knezevic A, Jovanovic T, Pekmezovic T. Risk factors for hepatocellular carcinoma: a case-control study in Belgrade (Serbia). Tumori. 2010; 96(6): 911-7.    | Liver cancer due to hepatitis B |
| Serbia       | 2004                                      | 2007 | Kanazir M, Boricic I, Delic D, Tepavcevic DK, Knezevic A, Jovanovic T, Pekmezovic T. Risk factors for hepatocellular carcinoma: a case-control study in Belgrade (Serbia). Tumori. 2010; 96(6): 911-7.    | Liver cancer due to hepatitis C |
| Singapore    | 1990                                      | 1993 | Khin LW, Teo CJ, Guan R. Seroprevalence of hepatitis B and C viral markers in patients with primary hepatocellular carcinoma in Singapore. Singapore Med J. 1996; 37(5): 492-6.                           | Liver cancer due to hepatitis B |
| Singapore    | 1990                                      | 1993 | Khin LW, Teo CJ, Guan R. Seroprevalence of hepatitis B and C viral markers in patients with primary hepatocellular carcinoma in Singapore. Singapore Med J. 1996; 37(5): 492-6.                           | Liver cancer due to hepatitis C |
| South Africa | 1991                                      | 1992 | Soni PN, Tait DR, Gopaul W, Sathar MA, Simjee AE. Hepatitis C virus infection in chronic liver disease in Natal. S Afr Med J. 1996; 86(1): 80-3.                                                          | Liver cancer due to hepatitis B |
| South Africa | 1991                                      | 1992 | Soni PN, Tait DR, Gopaul W, Sathar MA, Simjee AE. Hepatitis C virus infection in chronic liver disease in Natal. S Afr Med J. 1996; 86(1): 80-3.                                                          | Liver cancer due to hepatitis C |
| South Korea  | 2004                                      | 2009 | Kim BH, Park JW, Nam BH, Kwak HW, Kim WR. Validation of a model to estimate survival in ambulatory patients with hepatocellular carcinoma: a single-centre cohort study. Liver Int. 2014; 34(7): e317-23. | Liver cancer due to alcohol use |
| South Korea  | 2004                                      | 2009 | Kim BH, Park JW, Nam BH, Kwak HW, Kim WR. Validation of a model to estimate survival in ambulatory patients with hepatocellular carcinoma: a single-centre cohort study. Liver Int. 2014; 34(7): e317-23. | Liver cancer due to hepatitis B |
| South Korea  | 2004                                      | 2009 | Kim BH, Park JW, Nam BH, Kwak HW, Kim WR. Validation of a model to estimate survival in ambulatory patients with hepatocellular carcinoma: a single-centre cohort study. Liver Int. 2014; 34(7): e317-23. | Liver cancer due to hepatitis C |

| Country     | Years included in estimation (start, end) |      | Citation                                                                                                                                                                                                                                                                                                                                     | Liver cancer etiology            |
|-------------|-------------------------------------------|------|----------------------------------------------------------------------------------------------------------------------------------------------------------------------------------------------------------------------------------------------------------------------------------------------------------------------------------------------|----------------------------------|
| South Korea | 2004                                      | 2009 | Kim BH, Park JW, Nam BH, Kwak HW, Kim WR. Validation of a model to estimate survival in ambulatory patients with hepatocellular carcinoma: a single-centre cohort study. <i>Liver Int.</i> 2014; 34(7): e317-23.                                                                                                                             | Liver cancer due to other causes |
| Mexico      | 2003                                      | 2012 | Ladrón de Guevara L, Rojas-Macuil P, Sánchez-Chávez X, Rossano-García A, Gorraez-de-la-Mora MT, Cervantes-Sánchez G, Orozco-Vázquez J, Lemus-Velázquez M, Rosas-Zúñiga L, Erazo-Valle A, Di-Silvio M. Hepatocellular carcinoma: epidemiological profile from a cohort of federal employees in Mexico. <i>Ann Hepatol.</i> 2009; 8(3): 212-9. | Liver cancer due to alcohol use  |
| Mexico      | 2003                                      | 2012 | Ladrón de Guevara L, Rojas-Macuil P, Sánchez-Chávez X, Rossano-García A, Gorraez-de-la-Mora MT, Cervantes-Sánchez G, Orozco-Vázquez J, Lemus-Velázquez M, Rosas-Zúñiga L, Erazo-Valle A, Di-Silvio M. Hepatocellular carcinoma: epidemiological profile from a cohort of federal employees in Mexico. <i>Ann Hepatol.</i> 2009; 8(3): 212-9. | Liver cancer due to hepatitis B  |
| Mexico      | 2003                                      | 2012 | Ladrón de Guevara L, Rojas-Macuil P, Sánchez-Chávez X, Rossano-García A, Gorraez-de-la-Mora MT, Cervantes-Sánchez G, Orozco-Vázquez J, Lemus-Velázquez M, Rosas-Zúñiga L, Erazo-Valle A, Di-Silvio M. Hepatocellular carcinoma: epidemiological profile from a cohort of federal employees in Mexico. <i>Ann Hepatol.</i> 2009; 8(3): 212-9. | Liver cancer due to hepatitis C  |
| Mexico      | 2003                                      | 2012 | Ladrón de Guevara L, Rojas-Macuil P, Sánchez-Chávez X, Rossano-García A, Gorraez-de-la-Mora MT, Cervantes-Sánchez G, Orozco-Vázquez J, Lemus-Velázquez M, Rosas-Zúñiga L, Erazo-Valle A, Di-Silvio M. Hepatocellular carcinoma: epidemiological profile from a cohort of federal employees in Mexico. <i>Ann Hepatol.</i> 2009; 8(3): 212-9. | Liver cancer due to other causes |
| South Korea | 2003                                      | 2012 | Lee SS, Jeong S-H, Byoun Y-S, Chung SM, Seong MH, Sohn HR, Min B-Y, Jang ES, Kim J-W, Park GJ, Lee YJ, Lee KH, Ahn S. Clinical features and outcome of cryptogenic hepatocellular carcinoma compared to those of viral and alcoholic hepatocellular carcinoma. <i>BMC Cancer.</i> 2013; 335.                                                 | Liver cancer due to alcohol use  |
| South Korea | 2003                                      | 2012 | Lee SS, Jeong S-H, Byoun Y-S, Chung SM, Seong MH, Sohn HR, Min B-Y, Jang ES, Kim J-W, Park GJ, Lee YJ, Lee KH, Ahn S. Clinical features and outcome of cryptogenic hepatocellular carcinoma compared to those of viral and alcoholic hepatocellular carcinoma. <i>BMC Cancer.</i> 2013; 335.                                                 | Liver cancer due to hepatitis B  |
| South Korea | 2003                                      | 2012 | Lee SS, Jeong S-H, Byoun Y-S, Chung SM, Seong MH, Sohn HR, Min B-Y, Jang ES, Kim J-W, Park GJ, Lee YJ, Lee KH, Ahn S. Clinical features and outcome of cryptogenic hepatocellular carcinoma compared to those of viral and alcoholic hepatocellular carcinoma. <i>BMC Cancer.</i> 2013; 335.                                                 | Liver cancer due to hepatitis C  |

| Country     | Years included in estimation (start, end) |      | Citation                                                                                                                                                                                                                                                                                  | Liver cancer etiology            |
|-------------|-------------------------------------------|------|-------------------------------------------------------------------------------------------------------------------------------------------------------------------------------------------------------------------------------------------------------------------------------------------|----------------------------------|
| South Korea | 2003                                      | 2012 | Lee SS, Jeong S-H, Byoun Y-S, Chung SM, Seong MH, Sohn HR, Min B-Y, Jang ES, Kim J-W, Park GJ, Lee YJ, Lee KH, Ahn S. Clinical features and outcome of cryptogenic hepatocellular carcinoma compared to those of viral and alcoholic hepatocellular carcinoma. BMC Cancer. 2013; 335.     | Liver cancer due to other causes |
| South Korea | 1995                                      | 2000 | Shim J, Kim B-H, Kim NH, Dong SH, Kim HJ, Chang YW, Lee JI, Chang R. Clinical features of HBsAg-negative but anti-HBc-positive hepatocellular carcinoma in a hepatitis B virus endemic area. J Gastroenterol Hepatol. 2005; 20(5): 746-51.                                                | Liver cancer due to hepatitis B  |
| South Korea | 1995                                      | 2000 | Shim J, Kim B-H, Kim NH, Dong SH, Kim HJ, Chang YW, Lee JI, Chang R. Clinical features of HBsAg-negative but anti-HBc-positive hepatocellular carcinoma in a hepatitis B virus endemic area. J Gastroenterol Hepatol. 2005; 20(5): 746-51.                                                | Liver cancer due to hepatitis C  |
| Spain       | 2000                                      | 2000 | García-Torres ML, Zaragoza A, Giner R, Primo J, del Olmo JA. Incidence and epidemiological factors of hepatocellular carcinoma in Valencia during the year 2000. Rev Esp Enferm Dig. 2003; 95(6): 381-8.                                                                                  | Liver cancer due to hepatitis B  |
| Spain       | 2000                                      | 2000 | García-Torres ML, Zaragoza A, Giner R, Primo J, del Olmo JA. Incidence and epidemiological factors of hepatocellular carcinoma in Valencia during the year 2000. Rev Esp Enferm Dig. 2003; 95(6): 381-8.                                                                                  | Liver cancer due to hepatitis C  |
| Spain       | 2000                                      | 2000 | García-Torres ML, Zaragoza A, Giner R, Primo J, del Olmo JA. Incidence and epidemiological factors of hepatocellular carcinoma in Valencia during the year 2000. Rev Esp Enferm Dig. 2003; 95(6): 381-8.                                                                                  | Liver cancer due to other causes |
| Spain       | 1990                                      | 1994 | Macías Rodríguez MA, Rendón Unceta P, Tejada Cabrera M, Infante Hernández JM, Corro Aguilar F, Díaz García F, Benítez Rodríguez E, Mangas Rojas A, Martín Herrera L. Risk factors for hepatocellular carcinoma in patients with liver cirrhosis. Rev Esp Enferm Dig. 2000; 92(7): 458-69. | Liver cancer due to hepatitis B  |
| Spain       | 1990                                      | 1994 | Macías Rodríguez MA, Rendón Unceta P, Tejada Cabrera M, Infante Hernández JM, Corro Aguilar F, Díaz García F, Benítez Rodríguez E, Mangas Rojas A, Martín Herrera L. Risk factors for hepatocellular carcinoma in patients with liver cirrhosis. Rev Esp Enferm Dig. 2000; 92(7): 458-69. | Liver cancer due to hepatitis C  |
| Sudan       | 1996                                      | 1998 | Omer RE, Van't Veer P, Kadaru AM, Kampman E, el Khidir IM, Fedail SS, Kok FJ. The role of hepatitis B and hepatitis C viral infections in the incidence of hepatocellular carcinoma in Sudan. Trans R Soc Trop Med Hyg. 2001; 95(5): 487-91.                                              | Liver cancer due to hepatitis B  |
| Sudan       | 1996                                      | 1998 | Omer RE, Van't Veer P, Kadaru AM, Kampman E, el Khidir IM, Fedail SS, Kok FJ. The role of                                                                                                                                                                                                 | Liver cancer                     |



| Country    | Years included in estimation (start, end) |      | Citation                                                                                                                                                                                                                                                                          | Liver cancer etiology            |
|------------|-------------------------------------------|------|-----------------------------------------------------------------------------------------------------------------------------------------------------------------------------------------------------------------------------------------------------------------------------------|----------------------------------|
|            |                                           |      | hepatitis B and hepatitis C viral infections in the incidence of hepatocellular carcinoma in Sudan. <i>Trans R Soc Trop Med Hyg.</i> 2001; 95(5): 487-91.                                                                                                                         | due to hepatitis C               |
| Taiwan     | 1996                                      | 1999 | Lee CM, Lu SN, Changchien CS, Yeh CT, Hsu TT, Tang JH, Wang JH, Lin DY, Chen CL, Chen WJ. Age, gender, and local geographic variations of viral etiology of hepatocellular carcinoma in a hyperendemic area for hepatitis B virus infection. <i>Cancer.</i> 1999; 86(7): 1143-50. | Liver cancer due to hepatitis B  |
| Taiwan     | 1996                                      | 1999 | Lee CM, Lu SN, Changchien CS, Yeh CT, Hsu TT, Tang JH, Wang JH, Lin DY, Chen CL, Chen WJ. Age, gender, and local geographic variations of viral etiology of hepatocellular carcinoma in a hyperendemic area for hepatitis B virus infection. <i>Cancer.</i> 1999; 86(7): 1143-50. | Liver cancer due to hepatitis C  |
| Thailand   | 2007                                      | 2012 | Somboon K, Siramolpiwat S, Vilaichone RK. Epidemiology and survival of hepatocellular carcinoma in the central region of Thailand. <i>Asian Pac J Cancer Prev.</i> 2014; 15(8): 3567-70.                                                                                          | Liver cancer due to alcohol use  |
| Thailand   | 2007                                      | 2012 | Somboon K, Siramolpiwat S, Vilaichone RK. Epidemiology and survival of hepatocellular carcinoma in the central region of Thailand. <i>Asian Pac J Cancer Prev.</i> 2014; 15(8): 3567-70.                                                                                          | Liver cancer due to hepatitis B  |
| Thailand   | 2007                                      | 2012 | Somboon K, Siramolpiwat S, Vilaichone RK. Epidemiology and survival of hepatocellular carcinoma in the central region of Thailand. <i>Asian Pac J Cancer Prev.</i> 2014; 15(8): 3567-70.                                                                                          | Liver cancer due to hepatitis C  |
| Thailand   | 2007                                      | 2012 | Somboon K, Siramolpiwat S, Vilaichone RK. Epidemiology and survival of hepatocellular carcinoma in the central region of Thailand. <i>Asian Pac J Cancer Prev.</i> 2014; 15(8): 3567-70.                                                                                          | Liver cancer due to other causes |
| Thailand   | 1997                                      | 1998 | Tangkijvanich P, Hirsch P, Theamboonlers A, Nuchprayoon I, Poovorawan Y. Association of hepatitis viruses with hepatocellular carcinoma in Thailand. <i>J Gastroenterol.</i> 1999; 34(2): 227-33.                                                                                 | Liver cancer due to hepatitis B  |
| Thailand   | 1997                                      | 1998 | Tangkijvanich P, Hirsch P, Theamboonlers A, Nuchprayoon I, Poovorawan Y. Association of hepatitis viruses with hepatocellular carcinoma in Thailand. <i>J Gastroenterol.</i> 1999; 34(2): 227-33.                                                                                 | Liver cancer due to hepatitis C  |
| The Gambia | 1997                                      | 2001 | Kirk GD, Lesi OA, Mendy M, Akano AO, Sam O, Goedert JJ, Hainaut P, Hall AJ, Whittle H, Montesano R. The Gambia Liver Cancer Study: Infection with hepatitis B and C and the risk of hepatocellular carcinoma in West Africa. <i>Hepatology.</i> 2004; 39(1): 211-9.               | Liver cancer due to hepatitis B  |
| The Gambia | 1997                                      | 2001 | Kirk GD, Lesi OA, Mendy M, Akano AO, Sam O, Goedert JJ, Hainaut P, Hall AJ, Whittle H, Montesano R. The Gambia Liver Cancer Study: Infection with hepatitis B and C and the risk of                                                                                               | Liver cancer due to              |

| Country    | Years included in estimation (start, end) |      | Citation                                                                                                                                                                                                                                                     | Liver cancer etiology            |
|------------|-------------------------------------------|------|--------------------------------------------------------------------------------------------------------------------------------------------------------------------------------------------------------------------------------------------------------------|----------------------------------|
|            |                                           |      | hepatocellular carcinoma in West Africa. <i>Hepatology</i> . 2004; 39(1): 211-9.                                                                                                                                                                             | hepatitis C                      |
| The Gambia | 2002                                      | 2002 | Mboto CI, Davies-Russell A, Fielder M, Jewell AP. Hepatocellular Carcinoma in The Gambia and the role of Hepatitis B and Hepatitis C. <i>Int Semin Surg Oncol</i> . 2005; 2: 20.                                                                             | Liver cancer due to hepatitis B  |
| The Gambia | 2002                                      | 2002 | Mboto CI, Davies-Russell A, Fielder M, Jewell AP. Hepatocellular Carcinoma in The Gambia and the role of Hepatitis B and Hepatitis C. <i>Int Semin Surg Oncol</i> . 2005; 2: 20.                                                                             | Liver cancer due to hepatitis C  |
| The Gambia | 1997                                      | 2001 | Umoh NJ, Lesi OA, Mendy M, Bah E, Akano A, Whittle H, Hainaut P, Kirk GD. Aetiological differences in demographical, clinical and pathological characteristics of hepatocellular carcinoma in The Gambia. <i>Liver Int</i> . 2011; 31(2): 215-21.            | Liver cancer due to hepatitis B  |
| The Gambia | 1997                                      | 2001 | Umoh NJ, Lesi OA, Mendy M, Bah E, Akano A, Whittle H, Hainaut P, Kirk GD. Aetiological differences in demographical, clinical and pathological characteristics of hepatocellular carcinoma in The Gambia. <i>Liver Int</i> . 2011; 31(2): 215-21.            | Liver cancer due to hepatitis C  |
| Tunisia    | 1997                                      | 2009 | Said Y, Debbeche R, Ben Ali Z, Bouzid K, Trabelsi S, Bouzaidi S, Salem M, Rajhi H, Kouni Chahed M, Najjar T. [Epidemiological, clinical and therapeutic features of hepatocellular carcinoma in cirrhotic patients]. <i>Tunis Med</i> . 2012; 90(6): 468-72. | Liver cancer due to alcohol use  |
| Tunisia    | 1997                                      | 2009 | Said Y, Debbeche R, Ben Ali Z, Bouzid K, Trabelsi S, Bouzaidi S, Salem M, Rajhi H, Kouni Chahed M, Najjar T. [Epidemiological, clinical and therapeutic features of hepatocellular carcinoma in cirrhotic patients]. <i>Tunis Med</i> . 2012; 90(6): 468-72. | Liver cancer due to hepatitis B  |
| Tunisia    | 1997                                      | 2009 | Said Y, Debbeche R, Ben Ali Z, Bouzid K, Trabelsi S, Bouzaidi S, Salem M, Rajhi H, Kouni Chahed M, Najjar T. [Epidemiological, clinical and therapeutic features of hepatocellular carcinoma in cirrhotic patients]. <i>Tunis Med</i> . 2012; 90(6): 468-72. | Liver cancer due to hepatitis C  |
| Tunisia    | 1997                                      | 2009 | Said Y, Debbeche R, Ben Ali Z, Bouzid K, Trabelsi S, Bouzaidi S, Salem M, Rajhi H, Kouni Chahed M, Najjar T. [Epidemiological, clinical and therapeutic features of hepatocellular carcinoma in cirrhotic patients]. <i>Tunis Med</i> . 2012; 90(6): 468-72. | Liver cancer due to other causes |
| Tunisia    | 1991                                      | 1994 | Triki H. [Epidemiology of hepatitis B virus, hepatitis C virus and Delta virus in the general population and in liver cirrhosis in Tunisia]. <i>Arch Inst Pasteur Tunis</i> . 1994; 71(3-4): 403-6.                                                          | Liver cancer due to hepatitis B  |
| Tunisia    | 1991                                      | 1994 | Triki H. [Epidemiology of hepatitis B virus, hepatitis C virus and Delta virus in the general population and in liver cirrhosis in Tunisia]. <i>Arch Inst Pasteur Tunis</i> . 1994; 71(3-4): 403-6.                                                          | Liver cancer due to hepatitis C  |

| Country | Years included in estimation (start, end) |      | Citation                                                                                                                                                                                                                                                          | Liver cancer etiology            |
|---------|-------------------------------------------|------|-------------------------------------------------------------------------------------------------------------------------------------------------------------------------------------------------------------------------------------------------------------------|----------------------------------|
| Turkey  | 1994                                      | 2007 | Alacacioglu A, Somali I, Simsek I, Astarcioglu I, Ozkan M, Camci C, Alkis N, Karaoglu A, Tarhan O, Unek T, Yilmaz U. Epidemiology and survival of hepatocellular carcinoma in Turkey: outcome of multicenter study. <i>Jpn J Clin Oncol.</i> 2008; 38(10): 683-8. | Liver cancer due to alcohol use  |
| Turkey  | 1994                                      | 2007 | Alacacioglu A, Somali I, Simsek I, Astarcioglu I, Ozkan M, Camci C, Alkis N, Karaoglu A, Tarhan O, Unek T, Yilmaz U. Epidemiology and survival of hepatocellular carcinoma in Turkey: outcome of multicenter study. <i>Jpn J Clin Oncol.</i> 2008; 38(10): 683-8. | Liver cancer due to hepatitis B  |
| Turkey  | 1994                                      | 2007 | Alacacioglu A, Somali I, Simsek I, Astarcioglu I, Ozkan M, Camci C, Alkis N, Karaoglu A, Tarhan O, Unek T, Yilmaz U. Epidemiology and survival of hepatocellular carcinoma in Turkey: outcome of multicenter study. <i>Jpn J Clin Oncol.</i> 2008; 38(10): 683-8. | Liver cancer due to hepatitis C  |
| Turkey  | 1994                                      | 2007 | Alacacioglu A, Somali I, Simsek I, Astarcioglu I, Ozkan M, Camci C, Alkis N, Karaoglu A, Tarhan O, Unek T, Yilmaz U. Epidemiology and survival of hepatocellular carcinoma in Turkey: outcome of multicenter study. <i>Jpn J Clin Oncol.</i> 2008; 38(10): 683-8. | Liver cancer due to other causes |
| Turkey  | 1999                                      | 2002 | Ozer B, Serin E, Yilmaz U, Gümürdülü Y, Saygili OB, Kayaselçuk F, Boyacioğlu S. Clinicopathologic features and risk factors for hepatocellular carcinoma: results from a single center in southern Turkey. <i>Turk J Gastroenterol.</i> 2003; 14(2): 85-90.       | Liver cancer due to alcohol use  |
| Turkey  | 1999                                      | 2002 | Ozer B, Serin E, Yilmaz U, Gümürdülü Y, Saygili OB, Kayaselçuk F, Boyacioğlu S. Clinicopathologic features and risk factors for hepatocellular carcinoma: results from a single center in southern Turkey. <i>Turk J Gastroenterol.</i> 2003; 14(2): 85-90.       | Liver cancer due to hepatitis B  |
| Turkey  | 1999                                      | 2002 | Ozer B, Serin E, Yilmaz U, Gümürdülü Y, Saygili OB, Kayaselçuk F, Boyacioğlu S. Clinicopathologic features and risk factors for hepatocellular carcinoma: results from a single center in southern Turkey. <i>Turk J Gastroenterol.</i> 2003; 14(2): 85-90.       | Liver cancer due to hepatitis C  |
| Turkey  | 1999                                      | 2002 | Ozer B, Serin E, Yilmaz U, Gümürdülü Y, Saygili OB, Kayaselçuk F, Boyacioğlu S. Clinicopathologic features and risk factors for hepatocellular carcinoma: results from a single center in southern Turkey. <i>Turk J Gastroenterol.</i> 2003; 14(2): 85-90.       | Liver cancer due to other causes |
| Turkey  | 1995                                      | 1997 | Ozyilkan O, Arslan M, Ozyilkan E. Hepatitis B virus and hepatitis C virus infections in Turkish patients with hepatocellular carcinoma. <i>Am J Gastroenterol.</i> 1996; 91(7): 1479-80.                                                                          | Liver cancer due to hepatitis B  |
| Turkey  | 1995                                      | 1997 | Ozyilkan O, Arslan M, Ozyilkan E. Hepatitis B virus and hepatitis C virus infections in Turkish patients with hepatocellular carcinoma. <i>Am J Gastroenterol.</i> 1996; 91(7): 1479-80.                                                                          | Liver cancer due to hepatitis C  |
| Turkey  | 1994                                      | 1997 | Uzunalimoğlu O, Yurdaydin C, Cetinkaya H, Bozkaya H, Sahin T, Colakoğlu S, Tankurt E, Sarioğlu                                                                                                                                                                    | Liver cancer                     |

| Country       | Years included in estimation (start, end) |      | Citation                                                                                                                                                                                                                                                                                                                                                                   | Liver cancer etiology            |
|---------------|-------------------------------------------|------|----------------------------------------------------------------------------------------------------------------------------------------------------------------------------------------------------------------------------------------------------------------------------------------------------------------------------------------------------------------------------|----------------------------------|
|               |                                           |      | M, Ozenirler S, Akkiz H, Tözün N, Değertekin H, Okten A. Risk factors for hepatocellular carcinoma in Turkey. <i>Dig Dis Sci.</i> 2001; 46(5): 1022-8.                                                                                                                                                                                                                     | due to alcohol use               |
| Turkey        | 1994                                      | 1997 | UzunlIMOĞLU O, Yurdaydin C, Cetinkaya H, Bozkaya H, Sahin T, Colakođlu S, Tankurt E, Sariođlu M, Ozenirler S, Akkiz H, Tözün N, Değertekin H, Okten A. Risk factors for hepatocellular carcinoma in Turkey. <i>Dig Dis Sci.</i> 2001; 46(5): 1022-8.                                                                                                                       | Liver cancer due to hepatitis B  |
| Turkey        | 1994                                      | 1997 | UzunlIMOĞLU O, Yurdaydin C, Cetinkaya H, Bozkaya H, Sahin T, Colakođlu S, Tankurt E, Sariođlu M, Ozenirler S, Akkiz H, Tözün N, Değertekin H, Okten A. Risk factors for hepatocellular carcinoma in Turkey. <i>Dig Dis Sci.</i> 2001; 46(5): 1022-8.                                                                                                                       | Liver cancer due to hepatitis C  |
| Turkey        | 1994                                      | 1997 | UzunlIMOĞLU O, Yurdaydin C, Cetinkaya H, Bozkaya H, Sahin T, Colakođlu S, Tankurt E, Sariođlu M, Ozenirler S, Akkiz H, Tözün N, Değertekin H, Okten A. Risk factors for hepatocellular carcinoma in Turkey. <i>Dig Dis Sci.</i> 2001; 46(5): 1022-8.                                                                                                                       | Liver cancer due to other causes |
| United States | 1993                                      | 1999 | Davila JA, Morgan RO, Shaib Y, McGlynn KA, El-Serag HB. Hepatitis C infection and the increasing incidence of hepatocellular carcinoma: a population-based study. <i>Gastroenterology.</i> 2004; 127(5): 1372-80.                                                                                                                                                          | Liver cancer due to alcohol use  |
| United States | 1993                                      | 1999 | Davila JA, Morgan RO, Shaib Y, McGlynn KA, El-Serag HB. Hepatitis C infection and the increasing incidence of hepatocellular carcinoma: a population-based study. <i>Gastroenterology.</i> 2004; 127(5): 1372-80.                                                                                                                                                          | Liver cancer due to hepatitis B  |
| United States | 1993                                      | 1999 | Davila JA, Morgan RO, Shaib Y, McGlynn KA, El-Serag HB. Hepatitis C infection and the increasing incidence of hepatocellular carcinoma: a population-based study. <i>Gastroenterology.</i> 2004; 127(5): 1372-80.                                                                                                                                                          | Liver cancer due to hepatitis C  |
| United States | 1993                                      | 1999 | Davila JA, Morgan RO, Shaib Y, McGlynn KA, El-Serag HB. Hepatitis C infection and the increasing incidence of hepatocellular carcinoma: a population-based study. <i>Gastroenterology.</i> 2004; 127(5): 1372-80.                                                                                                                                                          | Liver cancer due to other causes |
| United States | 1997                                      | 1999 | Di Bisceglie AM, Lyra AC, Schwartz M, Reddy RK, Martin P, Gores G, Lok ASF, Hussain KB, Gish R, Van Thiel DH, Younossi Z, Tong M, Hassanein T, Balart L, Fleckenstein J, Flamm S, Blei A, Befeler AS, Liver Cancer Network. Hepatitis C-related hepatocellular carcinoma in the United States: influence of ethnic status. <i>Am J Gastroenterol.</i> 2003; 98(9): 2060-3. | Liver cancer due to hepatitis B  |
| United States | 1997                                      | 1999 | Di Bisceglie AM, Lyra AC, Schwartz M, Reddy RK, Martin P, Gores G, Lok ASF, Hussain KB, Gish R, Van Thiel DH, Younossi Z, Tong M, Hassanein T, Balart L, Fleckenstein J, Flamm S, Blei A, Befeler AS, Liver Cancer Network. Hepatitis C-related hepatocellular carcinoma in the United States: influence of ethnic status. <i>Am J Gastroenterol.</i> 2003; 98(9): 2060-3. | Liver cancer due to hepatitis C  |

| Country       | Years included in estimation (start, end) |      | Citation                                                                                                                                                                                                                                                                    | Liver cancer etiology            |
|---------------|-------------------------------------------|------|-----------------------------------------------------------------------------------------------------------------------------------------------------------------------------------------------------------------------------------------------------------------------------|----------------------------------|
| United States | 2001                                      | 2009 | Ha NB, Ha NB, Ahmed A, Ayoub W, Daugherty TJ, Chang ET, Lutchman GA, Garcia G, Cooper AD, Keeffe EB, Nguyen MH. Risk factors for hepatocellular carcinoma in patients with chronic liver disease: a case-control study. <i>Cancer Causes Control</i> . 2012; 23(3): 455-62. | Liver cancer due to hepatitis B  |
| United States | 2001                                      | 2009 | Ha NB, Ha NB, Ahmed A, Ayoub W, Daugherty TJ, Chang ET, Lutchman GA, Garcia G, Cooper AD, Keeffe EB, Nguyen MH. Risk factors for hepatocellular carcinoma in patients with chronic liver disease: a case-control study. <i>Cancer Causes Control</i> . 2012; 23(3): 455-62. | Liver cancer due to hepatitis C  |
| United States | 1993                                      | 1995 | Hassan MM, Frome A, Patt YZ, El-Serag HB. Rising prevalence of hepatitis C virus infection among patients recently diagnosed with hepatocellular carcinoma in the United States. <i>J Clin Gastroenterol</i> . 2002; 35(3): 266-9.                                          | Liver cancer due to hepatitis B  |
| United States | 1993                                      | 1995 | Hassan MM, Frome A, Patt YZ, El-Serag HB. Rising prevalence of hepatitis C virus infection among patients recently diagnosed with hepatocellular carcinoma in the United States. <i>J Clin Gastroenterol</i> . 2002; 35(3): 266-9.                                          | Liver cancer due to hepatitis C  |
| United States | 2002                                      | 2003 | Marrero JA, Fontana RJ, Fu S, Conjeevaram HS, Su GL, Lok AS. Alcohol, tobacco and obesity are synergistic risk factors for hepatocellular carcinoma. <i>J Hepatol</i> . 2005; 42(2): 218-24.                                                                                | Liver cancer due to alcohol use  |
| United States | 2002                                      | 2003 | Marrero JA, Fontana RJ, Fu S, Conjeevaram HS, Su GL, Lok AS. Alcohol, tobacco and obesity are synergistic risk factors for hepatocellular carcinoma. <i>J Hepatol</i> . 2005; 42(2): 218-24.                                                                                | Liver cancer due to hepatitis B  |
| United States | 2002                                      | 2003 | Marrero JA, Fontana RJ, Fu S, Conjeevaram HS, Su GL, Lok AS. Alcohol, tobacco and obesity are synergistic risk factors for hepatocellular carcinoma. <i>J Hepatol</i> . 2005; 42(2): 218-24.                                                                                | Liver cancer due to hepatitis C  |
| United States | 2002                                      | 2003 | Marrero JA, Fontana RJ, Fu S, Conjeevaram HS, Su GL, Lok AS. Alcohol, tobacco and obesity are synergistic risk factors for hepatocellular carcinoma. <i>J Hepatol</i> . 2005; 42(2): 218-24.                                                                                | Liver cancer due to other causes |
| United States | 1994                                      | 2010 | Welzel TM, Graubard BI, Quraishi S, Zeuzem S, Davila JA, El-Serag HB, McGlynn KA. Population-attributable fractions of risk factors for hepatocellular carcinoma in the United States. <i>Am J Gastroenterol</i> . 2013; 108(8): 1314-21.                                   | Liver cancer due to alcohol use  |
| United States | 1994                                      | 2010 | Welzel TM, Graubard BI, Quraishi S, Zeuzem S, Davila JA, El-Serag HB, McGlynn KA. Population-attributable fractions of risk factors for hepatocellular carcinoma in the United States. <i>Am J Gastroenterol</i> . 2013; 108(8): 1314-21.                                   | Liver cancer due to hepatitis B  |
| United States | 1994                                      | 2010 | Welzel TM, Graubard BI, Quraishi S, Zeuzem S, Davila JA, El-Serag HB, McGlynn KA. Population-                                                                                                                                                                               | Liver cancer                     |

| Country       | Years included in estimation (start, end) |      | Citation                                                                                                                                                                                                                                      | Liver cancer etiology            |
|---------------|-------------------------------------------|------|-----------------------------------------------------------------------------------------------------------------------------------------------------------------------------------------------------------------------------------------------|----------------------------------|
| States        |                                           |      | attributable fractions of risk factors for hepatocellular carcinoma in the United States. Am J Gastroenterol. 2013; 108(8): 1314-21.                                                                                                          | due to hepatitis C               |
| United States | 1994                                      | 2010 | Welzel TM, Graubard BI, Quraishi S, Zeuzem S, Davila JA, El-Serag HB, McGlynn KA. Population-attributable fractions of risk factors for hepatocellular carcinoma in the United States. Am J Gastroenterol. 2013; 108(8): 1314-21.             | Liver cancer due to other causes |
| United States | 2007                                      | 2009 | Yang JD, Harmsen WS, Slettedahl SW, Chaiteerakij R, Enders FT, Therneau TM, Orsini L, Kim WR, Roberts LR. Factors that affect risk for hepatocellular carcinoma and effects of surveillance. Clin Gastroenterol Hepatol. 2011; 9(7): 617-623. | Liver cancer due to alcohol use  |
| United States | 2007                                      | 2009 | Yang JD, Harmsen WS, Slettedahl SW, Chaiteerakij R, Enders FT, Therneau TM, Orsini L, Kim WR, Roberts LR. Factors that affect risk for hepatocellular carcinoma and effects of surveillance. Clin Gastroenterol Hepatol. 2011; 9(7): 617-623. | Liver cancer due to other causes |
| United States | 1976                                      | 1990 | Yang JD, Kim B, Sanderson SO, St Sauver JL, Yawn BP, Pedersen RA, Larson JJ, Therneau TM, Roberts LR, Kim WR. Hepatocellular carcinoma in olmsted county, Minnesota, 1976-2008. Mayo Clin Proc. 2012; 87(1): 9-16.                            | Liver cancer due to hepatitis B  |
| United States | 1976                                      | 1990 | Yang JD, Kim B, Sanderson SO, St Sauver JL, Yawn BP, Pedersen RA, Larson JJ, Therneau TM, Roberts LR, Kim WR. Hepatocellular carcinoma in olmsted county, Minnesota, 1976-2008. Mayo Clin Proc. 2012; 87(1): 9-16.                            | Liver cancer due to hepatitis C  |
| United States | 1991                                      | 2000 | Yang JD, Kim B, Sanderson SO, St Sauver JL, Yawn BP, Pedersen RA, Larson JJ, Therneau TM, Roberts LR, Kim WR. Hepatocellular carcinoma in olmsted county, Minnesota, 1976-2008. Mayo Clin Proc. 2012; 87(1): 9-16.                            | Liver cancer due to hepatitis B  |
| United States | 1991                                      | 2000 | Yang JD, Kim B, Sanderson SO, St Sauver JL, Yawn BP, Pedersen RA, Larson JJ, Therneau TM, Roberts LR, Kim WR. Hepatocellular carcinoma in olmsted county, Minnesota, 1976-2008. Mayo Clin Proc. 2012; 87(1): 9-16.                            | Liver cancer due to hepatitis C  |
| United States | 2011                                      | 2008 | Yang JD, Kim B, Sanderson SO, St Sauver JL, Yawn BP, Pedersen RA, Larson JJ, Therneau TM, Roberts LR, Kim WR. Hepatocellular carcinoma in olmsted county, Minnesota, 1976-2008. Mayo Clin Proc. 2012; 87(1): 9-16.                            | Liver cancer due to hepatitis B  |
| United States | 2011                                      | 2008 | Yang JD, Kim B, Sanderson SO, St Sauver JL, Yawn BP, Pedersen RA, Larson JJ, Therneau TM, Roberts LR, Kim WR. Hepatocellular carcinoma in olmsted county, Minnesota, 1976-2008. Mayo Clin Proc. 2012; 87(1): 9-16.                            | Liver cancer due to hepatitis C  |
| United States | 2000                                      | 2000 | Yu L, Sloane DA, Guo C, Howell CD. Risk factors for primary hepatocellular carcinoma in black and white Americans in 2000. Clin Gastroenterol Hepatol. 2006; 4(3): 355-60.                                                                    | Liver cancer due to alcohol      |

| Country       | Years included in estimation (start, end) |      | Citation                                                                                                                                                                                         | Liver cancer etiology            |
|---------------|-------------------------------------------|------|--------------------------------------------------------------------------------------------------------------------------------------------------------------------------------------------------|----------------------------------|
|               |                                           |      |                                                                                                                                                                                                  | use                              |
| United States | 2000                                      | 2000 | Yu L, Sloane DA, Guo C, Howell CD. Risk factors for primary hepatocellular carcinoma in black and white Americans in 2000. Clin Gastroenterol Hepatol. 2006; 4(3): 355-60.                       | Liver cancer due to hepatitis B  |
| United States | 2000                                      | 2000 | Yu L, Sloane DA, Guo C, Howell CD. Risk factors for primary hepatocellular carcinoma in black and white Americans in 2000. Clin Gastroenterol Hepatol. 2006; 4(3): 355-60.                       | Liver cancer due to hepatitis C  |
| United States | 2000                                      | 2000 | Yu L, Sloane DA, Guo C, Howell CD. Risk factors for primary hepatocellular carcinoma in black and white Americans in 2000. Clin Gastroenterol Hepatol. 2006; 4(3): 355-60.                       | Liver cancer due to other causes |
| Yemen         | 2001                                      | 2008 | Salem AK, Abdulrab A, Alfakeh Y, Aown A. Hepatocellular carcinoma in Yemeni patients: a single centre experience over an 8-year period. East Mediterr Health J. 2012; 18(7): 693-9.              | Liver cancer due to alcohol use  |
| Yemen         | 2001                                      | 2008 | Salem AK, Abdulrab A, Alfakeh Y, Aown A. Hepatocellular carcinoma in Yemeni patients: a single centre experience over an 8-year period. East Mediterr Health J. 2012; 18(7): 693-9.              | Liver cancer due to hepatitis B  |
| Yemen         | 2001                                      | 2008 | Salem AK, Abdulrab A, Alfakeh Y, Aown A. Hepatocellular carcinoma in Yemeni patients: a single centre experience over an 8-year period. East Mediterr Health J. 2012; 18(7): 693-9.              | Liver cancer due to hepatitis C  |
| Yemen         | 2001                                      | 2008 | Salem AK, Abdulrab A, Alfakeh Y, Aown A. Hepatocellular carcinoma in Yemeni patients: a single centre experience over an 8-year period. East Mediterr Health J. 2012; 18(7): 693-9.              | Liver cancer due to other causes |
| Zimbabwe      | 1994                                      | 1996 | Weinig M, Hakim JG, Gudza I, Tobaiwa O. Hepatitis C virus and HIV antibodies in patients with hepatocellular carcinoma in Zimbabwe: a pilot study. Trans R Soc Trop Med Hyg. 1997; 91(5): 570-2. | Liver cancer due to hepatitis B  |
| Zimbabwe      | 1994                                      | 1996 | Weinig M, Hakim JG, Gudza I, Tobaiwa O. Hepatitis C virus and HIV antibodies in patients with hepatocellular carcinoma in Zimbabwe: a pilot study. Trans R Soc Trop Med Hyg. 1997; 91(5): 570-2. | Liver cancer due to hepatitis C  |

425

426 *eTable 6: Disability weights including uncertainty intervals*

| Health state                          | Lay descriptions used to derive disability weights <sup>23</sup>                                                                                                             | Estimate | Uncertainty interval |       |
|---------------------------------------|------------------------------------------------------------------------------------------------------------------------------------------------------------------------------|----------|----------------------|-------|
| Cancer, diagnosis and primary therapy | Has pain, nausea, fatigue, weight loss and high anxiety.                                                                                                                     | 0.288    | 0.193                | 0.399 |
| Cancer, controlled phase              | Has a chronic disease that requires medication every day and causes some worry but minimal interference with daily activities.                                               | 0.049    | 0.031                | 0.072 |
| Cancer, metastatic                    | Has severe pain, extreme fatigue, weight loss and high anxiety.                                                                                                              | 0.451    | 0.307                | 0.600 |
| Terminal phase                        | Has lost a lot of weight and regularly uses strong medication to avoid constant pain. The person has no appetite, feels nauseous, and needs to spend most of the day in bed. | 0.540    | 0.377                | 0.687 |



427 *eTable 7: Socio-demographic Index groupings by geography, based on 2015 values*

| <b>Location</b>      | <b>SDI level</b> |
|----------------------|------------------|
| Aichi                | High SDI         |
| Akita                | High SDI         |
| Alabama              | High SDI         |
| Alaska               | High SDI         |
| Andorra              | High SDI         |
| Antigua and Barbuda  | High SDI         |
| Aomori               | High SDI         |
| Arizona              | High SDI         |
| Arkansas             | High SDI         |
| Australia            | High SDI         |
| Austria              | High SDI         |
| Beijing              | High SDI         |
| Belarus              | High SDI         |
| Belgium              | High SDI         |
| Bermuda              | High SDI         |
| Brunei               | High SDI         |
| California           | High SDI         |
| Canada               | High SDI         |
| Chiba                | High SDI         |
| Colorado             | High SDI         |
| Connecticut          | High SDI         |
| Cyprus               | High SDI         |
| Czech Republic       | High SDI         |
| Delaware             | High SDI         |
| Denmark              | High SDI         |
| District of Columbia | High SDI         |
| Distrito Federal     | High SDI         |
| Distrito Federal     | High SDI         |
| East Midlands        | High SDI         |
| East of England      | High SDI         |
| Ehime                | High SDI         |
| Estonia              | High SDI         |
| Finland              | High SDI         |
| Florida              | High SDI         |
| France               | High SDI         |
| Fukui                | High SDI         |
| Fukuoka              | High SDI         |
| Fukushima            | High SDI         |
| Georgia              | High SDI         |

| <b>Location</b>                                  | <b>SDI level</b> |
|--------------------------------------------------|------------------|
| Germany                                          | High SDI         |
| Gifu                                             | High SDI         |
| Greater London                                   | High SDI         |
| Guam                                             | High SDI         |
| Gunma                                            | High SDI         |
| Hawaii                                           | High SDI         |
| Hiroshima                                        | High SDI         |
| Hokkaidō                                         | High SDI         |
| Hong Kong Special Administrative Region of China | High SDI         |
| Hungary                                          | High SDI         |
| Hyōgo                                            | High SDI         |
| Ibaraki                                          | High SDI         |
| Iceland                                          | High SDI         |
| Idaho                                            | High SDI         |
| Illinois                                         | High SDI         |
| Indiana                                          | High SDI         |
| Iowa                                             | High SDI         |
| Ireland                                          | High SDI         |
| Ishikawa                                         | High SDI         |
| Israel                                           | High SDI         |
| Italy                                            | High SDI         |
| Iwate                                            | High SDI         |
| Kagawa                                           | High SDI         |
| Kagoshima                                        | High SDI         |
| Kanagawa                                         | High SDI         |
| Kansas                                           | High SDI         |
| Kentucky                                         | High SDI         |
| Kōchi                                            | High SDI         |
| Kumamoto                                         | High SDI         |
| Kuwait                                           | High SDI         |
| Kyōto                                            | High SDI         |
| Latvia                                           | High SDI         |
| Lithuania                                        | High SDI         |
| Louisiana                                        | High SDI         |
| Luxembourg                                       | High SDI         |
| Macao Special Administrative Region of China     | High SDI         |
| Maine                                            | High SDI         |
| Maryland                                         | High SDI         |
| Massachusetts                                    | High SDI         |

| <b>Location</b>          | <b>SDI level</b> |
|--------------------------|------------------|
| Michigan                 | High SDI         |
| Mie                      | High SDI         |
| Minnesota                | High SDI         |
| Mississippi              | High SDI         |
| Missouri                 | High SDI         |
| Miyagi                   | High SDI         |
| Miyazaki                 | High SDI         |
| Montana                  | High SDI         |
| Nagano                   | High SDI         |
| Nagasaki                 | High SDI         |
| Nara                     | High SDI         |
| Nebraska                 | High SDI         |
| Netherlands              | High SDI         |
| Nevada                   | High SDI         |
| New Hampshire            | High SDI         |
| New Jersey               | High SDI         |
| New Mexico               | High SDI         |
| New York                 | High SDI         |
| New Zealand              | High SDI         |
| Niigata                  | High SDI         |
| North Carolina           | High SDI         |
| North Dakota             | High SDI         |
| North West England       | High SDI         |
| Northern Mariana Islands | High SDI         |
| Norway                   | High SDI         |
| Ohio                     | High SDI         |
| Ôita                     | High SDI         |
| Okayama                  | High SDI         |
| Okinawa                  | High SDI         |
| Oklahoma                 | High SDI         |
| Oregon                   | High SDI         |
| Ôsaka                    | High SDI         |
| Pennsylvania             | High SDI         |
| Poland                   | High SDI         |
| Puerto Rico              | High SDI         |
| Rhode Island             | High SDI         |
| Russia                   | High SDI         |
| Saga                     | High SDI         |
| Saitama                  | High SDI         |
| Scotland                 | High SDI         |

| <b>Location</b>         | <b>SDI level</b> |
|-------------------------|------------------|
| Shanghai                | High SDI         |
| Shiga                   | High SDI         |
| Shimane                 | High SDI         |
| Shizuoka                | High SDI         |
| Singapore               | High SDI         |
| Slovakia                | High SDI         |
| Slovenia                | High SDI         |
| South Carolina          | High SDI         |
| South Dakota            | High SDI         |
| South East England      | High SDI         |
| South Korea             | High SDI         |
| South West England      | High SDI         |
| Stockholm               | High SDI         |
| Sweden except Stockholm | High SDI         |
| Switzerland             | High SDI         |
| Taiwan                  | High SDI         |
| Tennessee               | High SDI         |
| Texas                   | High SDI         |
| The Bahamas             | High SDI         |
| Tianjin                 | High SDI         |
| Tochigi                 | High SDI         |
| Tokushima               | High SDI         |
| Tōkyō                   | High SDI         |
| Tottori                 | High SDI         |
| Toyama                  | High SDI         |
| Trinidad and Tobago     | High SDI         |
| United Arab Emirates    | High SDI         |
| Utah                    | High SDI         |
| Vermont                 | High SDI         |
| Virgin Islands, U.S.    | High SDI         |
| Virginia                | High SDI         |
| Wakayama                | High SDI         |
| Wales                   | High SDI         |
| Washington              | High SDI         |
| West Midlands           | High SDI         |
| West Virginia           | High SDI         |
| Wisconsin               | High SDI         |
| Wyoming                 | High SDI         |
| Yamagata                | High SDI         |
| Yamaguchi               | High SDI         |

| <b>Location</b>          | <b>SDI level</b> |
|--------------------------|------------------|
| Yamanashi                | High SDI         |
| Yorkshire and the Humber | High SDI         |
| 'Asir                    | High-middle SDI  |
| Aguascalientes           | High-middle SDI  |
| Albania                  | High-middle SDI  |
| American Samoa           | High-middle SDI  |
| Andhra Pradesh, Urban    | High-middle SDI  |
| Argentina                | High-middle SDI  |
| Armenia                  | High-middle SDI  |
| Azerbaijan               | High-middle SDI  |
| Bahah                    | High-middle SDI  |
| Bahrain                  | High-middle SDI  |
| Baja California          | High-middle SDI  |
| Baja California Sur      | High-middle SDI  |
| Barbados                 | High-middle SDI  |
| Bosnia and Herzegovina   | High-middle SDI  |
| Bulgaria                 | High-middle SDI  |
| Campeche                 | High-middle SDI  |
| Chihuahua                | High-middle SDI  |
| Chile                    | High-middle SDI  |
| Coahuila                 | High-middle SDI  |
| Colima                   | High-middle SDI  |
| Colombia                 | High-middle SDI  |
| Costa Rica               | High-middle SDI  |
| Croatia                  | High-middle SDI  |
| Cuba                     | High-middle SDI  |
| Delhi, Rural             | High-middle SDI  |
| Delhi, Urban             | High-middle SDI  |
| Dominica                 | High-middle SDI  |
| Dominican Republic       | High-middle SDI  |
| Durango                  | High-middle SDI  |
| Eastern Cape             | High-middle SDI  |
| Eastern Province         | High-middle SDI  |
| Ecuador                  | High-middle SDI  |
| Espírito Santo           | High-middle SDI  |
| Fiji                     | High-middle SDI  |
| Free State               | High-middle SDI  |
| Gauteng                  | High-middle SDI  |
| Georgia                  | High-middle SDI  |
| Goa, Rural               | High-middle SDI  |

| <b>Location</b>         | <b>SDI level</b> |
|-------------------------|------------------|
| Goa, Urban              | High-middle SDI  |
| Greece                  | High-middle SDI  |
| Greenland               | High-middle SDI  |
| Grenada                 | High-middle SDI  |
| Guangdong               | High-middle SDI  |
| Ha'il                   | High-middle SDI  |
| Haryāna, Urban          | High-middle SDI  |
| Heilongjiang            | High-middle SDI  |
| Himachal Pradesh, Urban | High-middle SDI  |
| Inner Mongolia          | High-middle SDI  |
| Iran                    | High-middle SDI  |
| Jalisco                 | High-middle SDI  |
| Jamaica                 | High-middle SDI  |
| Jawf                    | High-middle SDI  |
| Jiangsu                 | High-middle SDI  |
| Jilin                   | High-middle SDI  |
| Jordan                  | High-middle SDI  |
| Karnātaka, Urban        | High-middle SDI  |
| Kazakhstan              | High-middle SDI  |
| KwaZulu-Natal           | High-middle SDI  |
| Lebanon                 | High-middle SDI  |
| Liaoning                | High-middle SDI  |
| Macedonia               | High-middle SDI  |
| Madinah                 | High-middle SDI  |
| Mahārāshtra, Urban      | High-middle SDI  |
| Makkah                  | High-middle SDI  |
| Malaysia                | High-middle SDI  |
| Malta                   | High-middle SDI  |
| Mauritius               | High-middle SDI  |
| México                  | High-middle SDI  |
| Moldova                 | High-middle SDI  |
| Mongolia                | High-middle SDI  |
| Montenegro              | High-middle SDI  |
| Morelos                 | High-middle SDI  |
| Mpumalanga              | High-middle SDI  |
| Nairobi                 | High-middle SDI  |
| Nayarit                 | High-middle SDI  |
| North East England      | High-middle SDI  |
| North-West              | High-middle SDI  |
| Northern Borders        | High-middle SDI  |

| <b>Location</b>                  | <b>SDI level</b> |
|----------------------------------|------------------|
| Northern Cape                    | High-middle SDI  |
| Northern Ireland                 | High-middle SDI  |
| Nuevo León                       | High-middle SDI  |
| Oman                             | High-middle SDI  |
| Panama                           | High-middle SDI  |
| Peru                             | High-middle SDI  |
| Portugal                         | High-middle SDI  |
| Punjab, Urban                    | High-middle SDI  |
| Qassim                           | High-middle SDI  |
| Qatar                            | High-middle SDI  |
| Querétaro                        | High-middle SDI  |
| Quintana Roo                     | High-middle SDI  |
| Rio de Janeiro                   | High-middle SDI  |
| Rio Grande do Sul                | High-middle SDI  |
| Riyadh                           | High-middle SDI  |
| Romania                          | High-middle SDI  |
| Saint Lucia                      | High-middle SDI  |
| Saint Vincent and the Grenadines | High-middle SDI  |
| San Luis Potosí                  | High-middle SDI  |
| Santa Catarina                   | High-middle SDI  |
| São Paulo                        | High-middle SDI  |
| Serbia                           | High-middle SDI  |
| Seychelles                       | High-middle SDI  |
| Shandong                         | High-middle SDI  |
| Shanxi                           | High-middle SDI  |
| Sikkim, Urban                    | High-middle SDI  |
| Sinaloa                          | High-middle SDI  |
| Sonora                           | High-middle SDI  |
| Spain                            | High-middle SDI  |
| Sri Lanka                        | High-middle SDI  |
| Suriname                         | High-middle SDI  |
| Tabasco                          | High-middle SDI  |
| Tabuk                            | High-middle SDI  |
| Tamaulipas                       | High-middle SDI  |
| Tamil Nādu, Urban                | High-middle SDI  |
| Thailand                         | High-middle SDI  |
| The Six Minor Territories, Urban | High-middle SDI  |
| Tlaxcala                         | High-middle SDI  |
| Turkey                           | High-middle SDI  |
| Turkmenistan                     | High-middle SDI  |

| <b>Location</b>                | <b>SDI level</b> |
|--------------------------------|------------------|
| Ukraine                        | High-middle SDI  |
| Uruguay                        | High-middle SDI  |
| Uttarakhand, Urban             | High-middle SDI  |
| Uzbekistan                     | High-middle SDI  |
| Venezuela                      | High-middle SDI  |
| Western Cape                   | High-middle SDI  |
| Yucatán                        | High-middle SDI  |
| Zhejiang                       | High-middle SDI  |
| Acre                           | Middle SDI       |
| Algeria                        | Middle SDI       |
| Amapá                          | Middle SDI       |
| Amazonas                       | Middle SDI       |
| Andhra Pradesh, Rural          | Middle SDI       |
| Anhui                          | Middle SDI       |
| Arunāchal Pradesh, Urban       | Middle SDI       |
| Assam, Urban                   | Middle SDI       |
| Bahia                          | Middle SDI       |
| Belize                         | Middle SDI       |
| Bihār, Urban                   | Middle SDI       |
| Bolivia                        | Middle SDI       |
| Botswana                       | Middle SDI       |
| Chhattīsgarh, Urban            | Middle SDI       |
| Chiapas                        | Middle SDI       |
| Chongqing                      | Middle SDI       |
| Egypt                          | Middle SDI       |
| El Salvador                    | Middle SDI       |
| Equatorial Guinea              | Middle SDI       |
| Federated States of Micronesia | Middle SDI       |
| Fujian                         | Middle SDI       |
| Gabon                          | Middle SDI       |
| Gansu                          | Middle SDI       |
| Goiás                          | Middle SDI       |
| Guanajuato                     | Middle SDI       |
| Guangxi                        | Middle SDI       |
| Guerrero                       | Middle SDI       |
| Gujarāt, Urban                 | Middle SDI       |
| Guyana                         | Middle SDI       |
| Hainan                         | Middle SDI       |
| Haryāna, Rural                 | Middle SDI       |
| Hebei                          | Middle SDI       |



| <b>Location</b>          | <b>SDI level</b> |
|--------------------------|------------------|
| Henan                    | Middle SDI       |
| Hidalgo                  | Middle SDI       |
| Himachal Pradesh, Rural  | Middle SDI       |
| Honduras                 | Middle SDI       |
| Hubei                    | Middle SDI       |
| Hunan                    | Middle SDI       |
| Indonesia                | Middle SDI       |
| Iraq                     | Middle SDI       |
| Jammu and Kashmir, Urban | Middle SDI       |
| Jharkhand, Urban         | Middle SDI       |
| Jiangxi                  | Middle SDI       |
| Jizan                    | Middle SDI       |
| Kerala, Rural            | Middle SDI       |
| Kerala, Urban            | Middle SDI       |
| Kiambu                   | Middle SDI       |
| Kyrgyzstan               | Middle SDI       |
| Laikipia                 | Middle SDI       |
| Libya                    | Middle SDI       |
| Limpopo                  | Middle SDI       |
| Madhya Pradesh, Urban    | Middle SDI       |
| Mahārāshtra, Rural       | Middle SDI       |
| Maldives                 | Middle SDI       |
| Manipur, Urban           | Middle SDI       |
| Marshall Islands         | Middle SDI       |
| Mato Grosso              | Middle SDI       |
| Mato Grosso do Sul       | Middle SDI       |
| Meghālaya, Urban         | Middle SDI       |
| Michoacán de Ocampo      | Middle SDI       |
| Minas Gerais             | Middle SDI       |
| Mizoram, Urban           | Middle SDI       |
| Mombasa                  | Middle SDI       |
| Nāgāland, Rural          | Middle SDI       |
| Nāgāland, Urban          | Middle SDI       |
| Najran                   | Middle SDI       |
| Namibia                  | Middle SDI       |
| Nicaragua                | Middle SDI       |
| Ningxia                  | Middle SDI       |
| North Korea              | Middle SDI       |
| Nyeri                    | Middle SDI       |
| Oaxaca                   | Middle SDI       |

| <b>Location</b>                  | <b>SDI level</b> |
|----------------------------------|------------------|
| Orissa, Urban                    | Middle SDI       |
| Palestine                        | Middle SDI       |
| Pará                             | Middle SDI       |
| Paraguay                         | Middle SDI       |
| Paraná                           | Middle SDI       |
| Pernambuco                       | Middle SDI       |
| Philippines                      | Middle SDI       |
| Puebla                           | Middle SDI       |
| Punjab, Rural                    | Middle SDI       |
| Qinghai                          | Middle SDI       |
| Rājasthān, Urban                 | Middle SDI       |
| Rio Grande do Norte              | Middle SDI       |
| Rondônia                         | Middle SDI       |
| Roraima                          | Middle SDI       |
| Samoa                            | Middle SDI       |
| Sergipe                          | Middle SDI       |
| Shaanxi                          | Middle SDI       |
| Sichuan                          | Middle SDI       |
| Sikkim, Rural                    | Middle SDI       |
| Swaziland                        | Middle SDI       |
| Syria                            | Middle SDI       |
| Tajikistan                       | Middle SDI       |
| Tamil Nādu, Rural                | Middle SDI       |
| Telangana, Urban                 | Middle SDI       |
| The Six Minor Territories, Rural | Middle SDI       |
| Tocantins                        | Middle SDI       |
| Tonga                            | Middle SDI       |
| Tripura, Urban                   | Middle SDI       |
| Tunisia                          | Middle SDI       |
| Uttar Pradesh, Urban             | Middle SDI       |
| Uttarakhand, Rural               | Middle SDI       |
| Veracruz de Ignacio de la Llave  | Middle SDI       |
| Vietnam                          | Middle SDI       |
| West Bengal, Urban               | Middle SDI       |
| Xinjiang                         | Middle SDI       |
| Yunnan                           | Middle SDI       |
| Zacatecas                        | Middle SDI       |
| Alagoas                          | Low-middle SDI   |
| Angola                           | Low-middle SDI   |
| Arunāchal Pradesh, Rural         | Low-middle SDI   |

| <b>Location</b>          | <b>SDI level</b> |
|--------------------------|------------------|
| Assam, Rural             | Low-middle SDI   |
| Bangladesh               | Low-middle SDI   |
| Bhutan                   | Low-middle SDI   |
| Bihār, Rural             | Low-middle SDI   |
| Bomet                    | Low-middle SDI   |
| Bungoma                  | Low-middle SDI   |
| Cambodia                 | Low-middle SDI   |
| Cameroon                 | Low-middle SDI   |
| Cape Verde               | Low-middle SDI   |
| Ceará                    | Low-middle SDI   |
| Chhattīsgarh, Rural      | Low-middle SDI   |
| Congo                    | Low-middle SDI   |
| Djibouti                 | Low-middle SDI   |
| Elgeyo-Marakwet          | Low-middle SDI   |
| Embu                     | Low-middle SDI   |
| Ghana                    | Low-middle SDI   |
| Guatemala                | Low-middle SDI   |
| Guizhou                  | Low-middle SDI   |
| Gujarāt, Rural           | Low-middle SDI   |
| Haiti                    | Low-middle SDI   |
| HomaBay                  | Low-middle SDI   |
| Jammu and Kashmīr, Rural | Low-middle SDI   |
| Jharkhand, Rural         | Low-middle SDI   |
| Kajiado                  | Low-middle SDI   |
| Kakamega                 | Low-middle SDI   |
| Karnāṭaka, Rural         | Low-middle SDI   |
| Kericho                  | Low-middle SDI   |
| Kiribati                 | Low-middle SDI   |
| Kirinyaga                | Low-middle SDI   |
| Kisii                    | Low-middle SDI   |
| Kisumu                   | Low-middle SDI   |
| Kwale                    | Low-middle SDI   |
| Lamu                     | Low-middle SDI   |
| Laos                     | Low-middle SDI   |
| Lesotho                  | Low-middle SDI   |
| Machakos                 | Low-middle SDI   |
| Madhya Pradesh, Rural    | Low-middle SDI   |
| Makueni                  | Low-middle SDI   |
| Manipur, Rural           | Low-middle SDI   |
| Maranhão                 | Low-middle SDI   |

| <b>Location</b>       | <b>SDI level</b> |
|-----------------------|------------------|
| Meghālaya, Rural      | Low-middle SDI   |
| Meru                  | Low-middle SDI   |
| Migori                | Low-middle SDI   |
| Mizoram, Rural        | Low-middle SDI   |
| Morocco               | Low-middle SDI   |
| Murang'a              | Low-middle SDI   |
| Myanmar               | Low-middle SDI   |
| Nakuru                | Low-middle SDI   |
| Nandi                 | Low-middle SDI   |
| Nepal                 | Low-middle SDI   |
| Nigeria               | Low-middle SDI   |
| Nyamira               | Low-middle SDI   |
| Nyandarua             | Low-middle SDI   |
| Orissa, Rural         | Low-middle SDI   |
| Pakistan              | Low-middle SDI   |
| Papua New Guinea      | Low-middle SDI   |
| Paraíba               | Low-middle SDI   |
| Piauí                 | Low-middle SDI   |
| Rājasthān, Rural      | Low-middle SDI   |
| Sao Tome and Principe | Low-middle SDI   |
| Siaya                 | Low-middle SDI   |
| Solomon Islands       | Low-middle SDI   |
| Sudan                 | Low-middle SDI   |
| TaitaTaveta           | Low-middle SDI   |
| Tanzania              | Low-middle SDI   |
| Telangana, Rural      | Low-middle SDI   |
| TharakaNithi          | Low-middle SDI   |
| Tibet                 | Low-middle SDI   |
| Timor-Leste           | Low-middle SDI   |
| TransNzoia            | Low-middle SDI   |
| Tripura, Rural        | Low-middle SDI   |
| UasinGishu            | Low-middle SDI   |
| Uttar Pradesh, Rural  | Low-middle SDI   |
| Vanuatu               | Low-middle SDI   |
| Vihiga                | Low-middle SDI   |
| West Bengal, Rural    | Low-middle SDI   |
| Yemen                 | Low-middle SDI   |
| Zambia                | Low-middle SDI   |
| Zimbabwe              | Low-middle SDI   |
| Afghanistan           | Low SDI          |

| <b>Location</b>                  | <b>SDI level</b> |
|----------------------------------|------------------|
| Baringo                          | Low SDI          |
| Benin                            | Low SDI          |
| Burkina Faso                     | Low SDI          |
| Burundi                          | Low SDI          |
| Busia                            | Low SDI          |
| Central African Republic         | Low SDI          |
| Chad                             | Low SDI          |
| Comoros                          | Low SDI          |
| Cote d'Ivoire                    | Low SDI          |
| Democratic Republic of the Congo | Low SDI          |
| Eritrea                          | Low SDI          |
| Ethiopia                         | Low SDI          |
| Garissa                          | Low SDI          |
| Guinea                           | Low SDI          |
| Guinea-Bissau                    | Low SDI          |
| Isiolo                           | Low SDI          |
| Kilifi                           | Low SDI          |
| Kitui                            | Low SDI          |
| Liberia                          | Low SDI          |
| Madagascar                       | Low SDI          |
| Malawi                           | Low SDI          |
| Mali                             | Low SDI          |
| Mandera                          | Low SDI          |
| Marsabit                         | Low SDI          |
| Mauritania                       | Low SDI          |
| Mozambique                       | Low SDI          |
| Narok                            | Low SDI          |
| Niger                            | Low SDI          |
| Rwanda                           | Low SDI          |
| Samburu                          | Low SDI          |
| Senegal                          | Low SDI          |
| Sierra Leone                     | Low SDI          |
| Somalia                          | Low SDI          |
| South Sudan                      | Low SDI          |
| TanaRiver                        | Low SDI          |
| The Gambia                       | Low SDI          |
| Togo                             | Low SDI          |
| Turkana                          | Low SDI          |
| Uganda                           | Low SDI          |
| Wajir                            | Low SDI          |

428

| Location  | SDI level |
|-----------|-----------|
| WestPokot | Low SDI   |

# Liver cancer mortality estimation

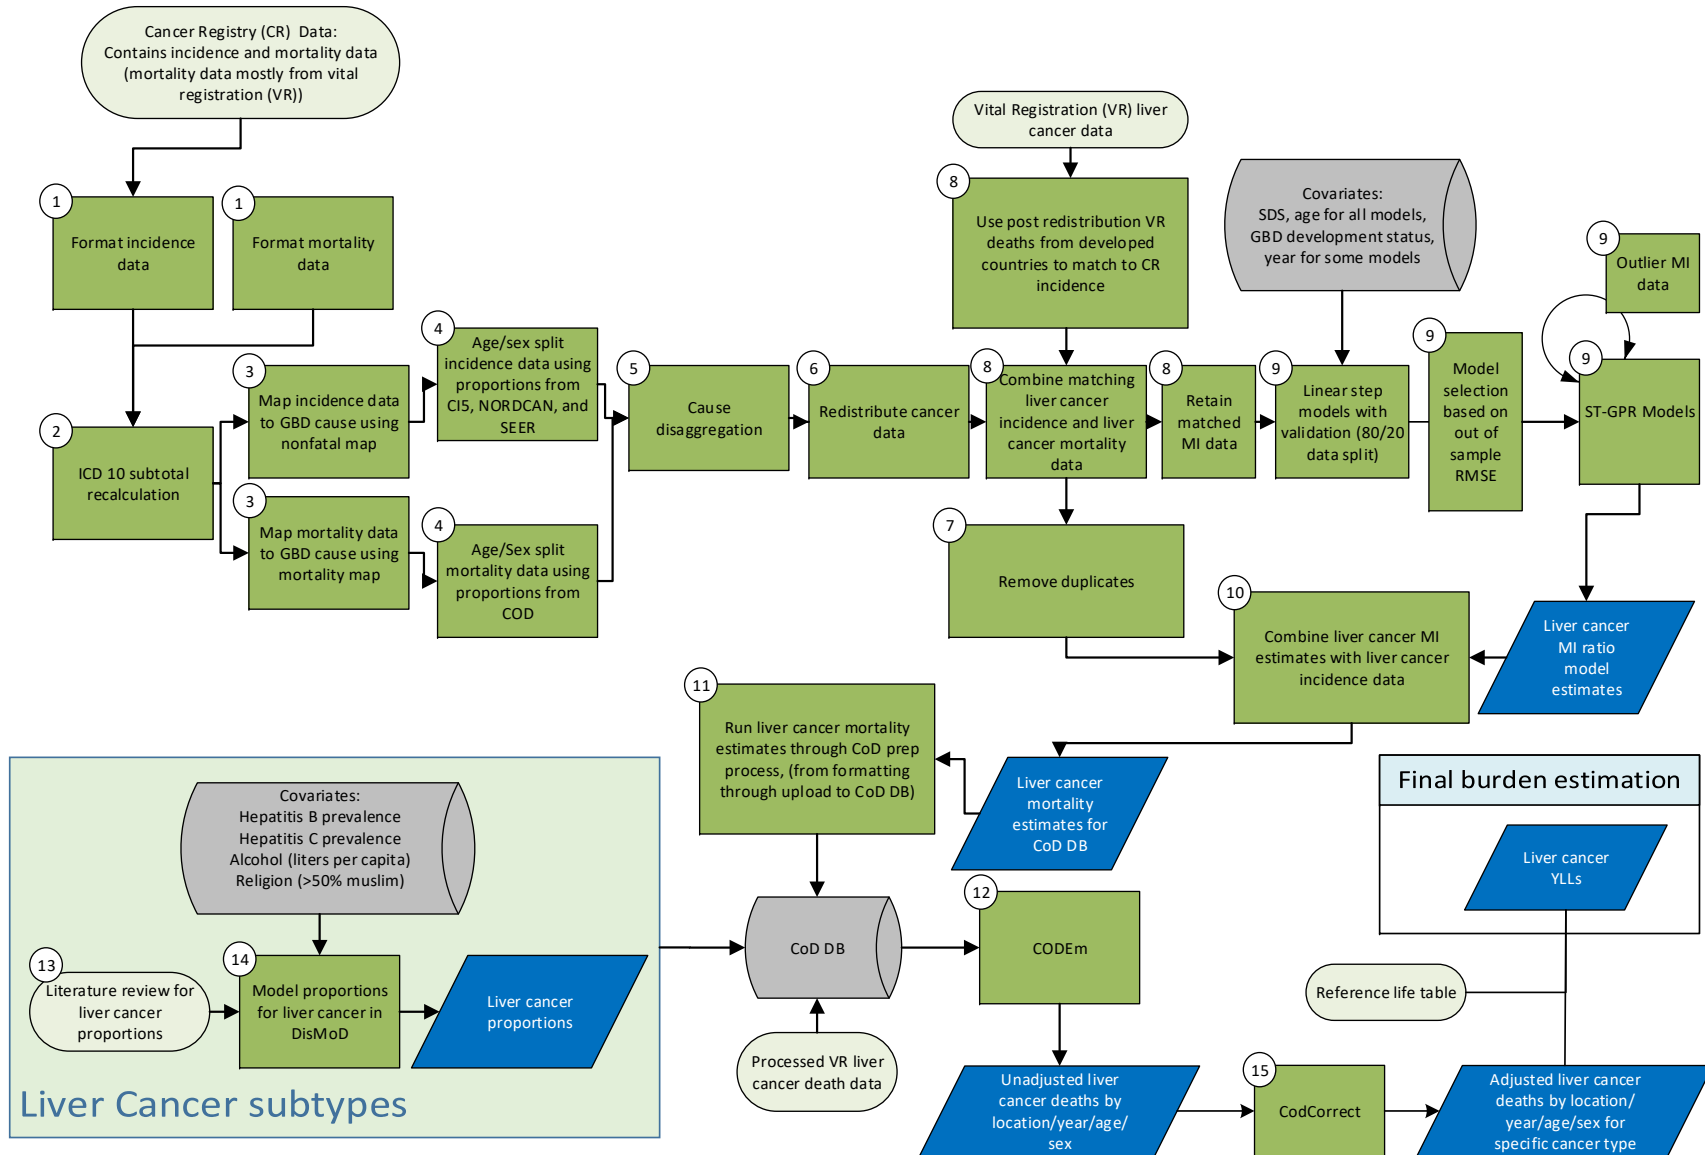

Abbreviations: ICD: International classification of diseases; CIS: Cancer Incidence in Five Continents, DB: database

eFigure 1: Flowchart, liver cancer mortality estimation

# Liver cancer incidence, prevalence, and disability estimation

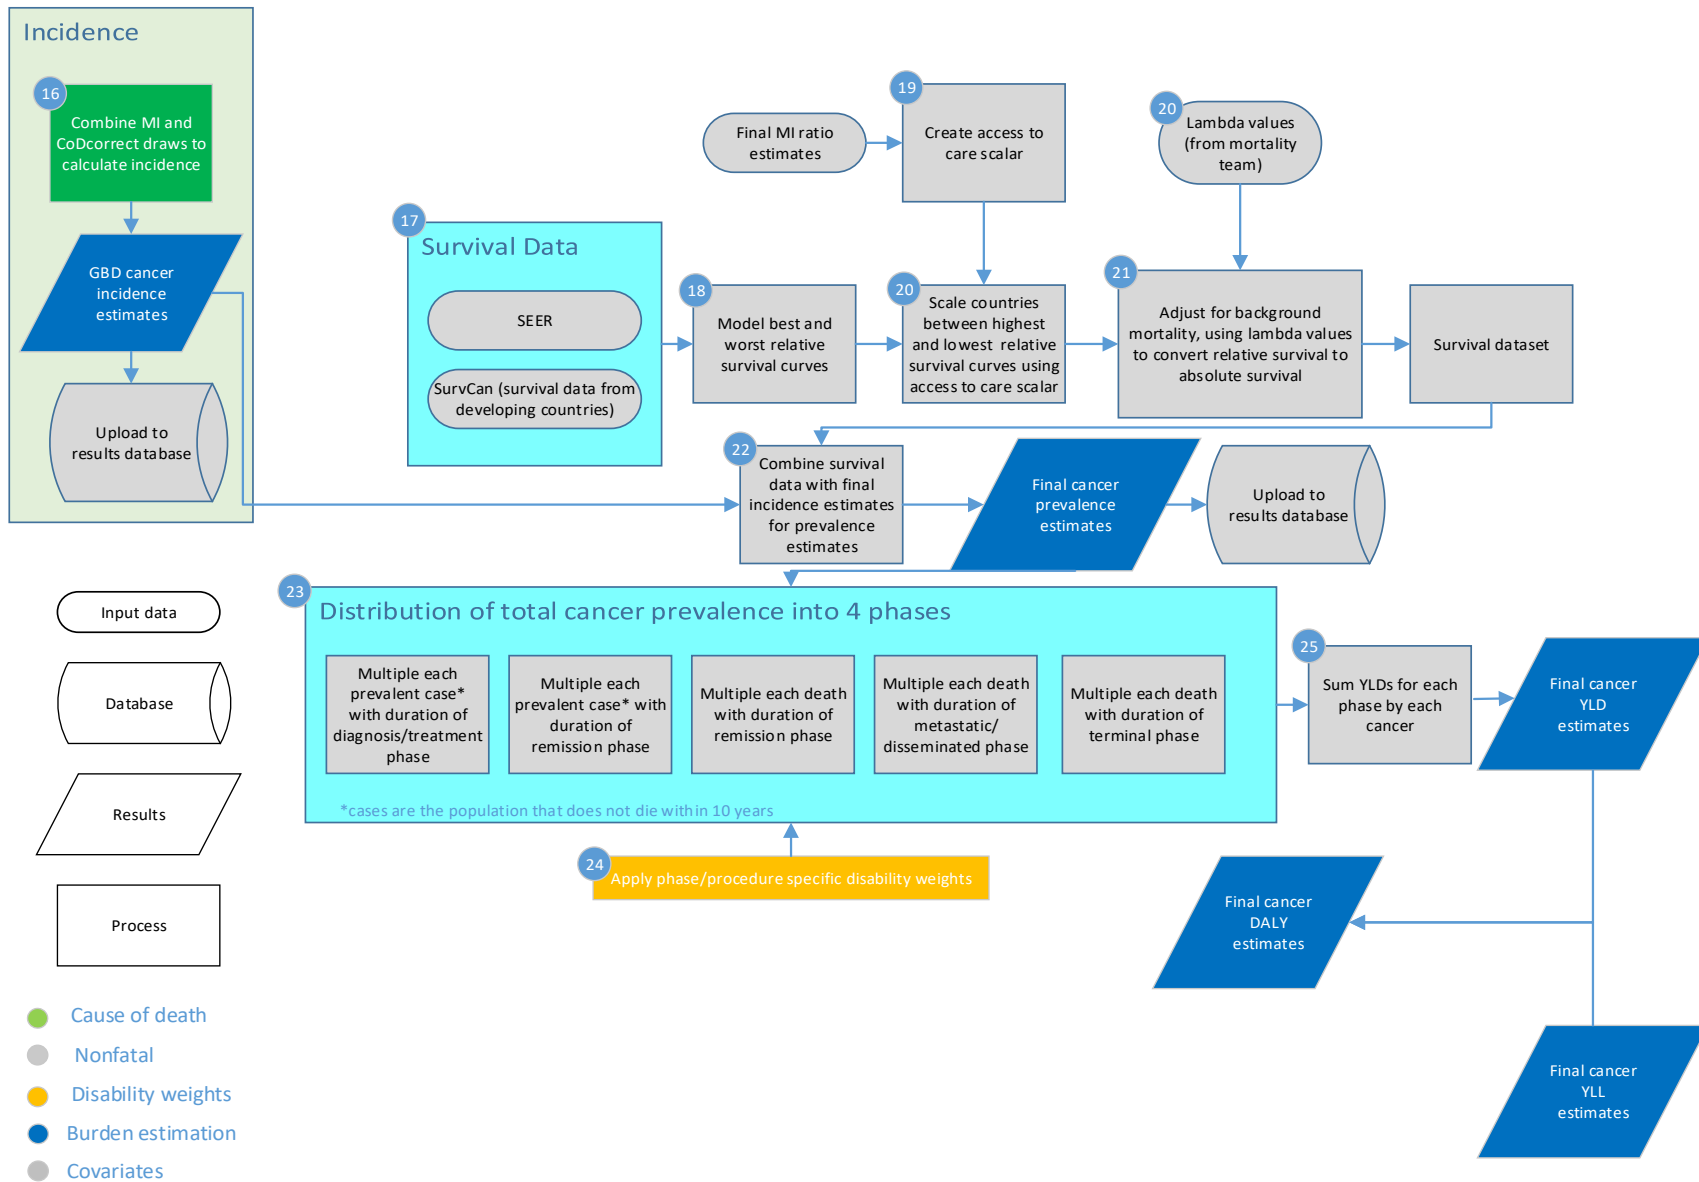

431

432 eFigure 2: Flowchart, liver cancer incidence to DALY estimation



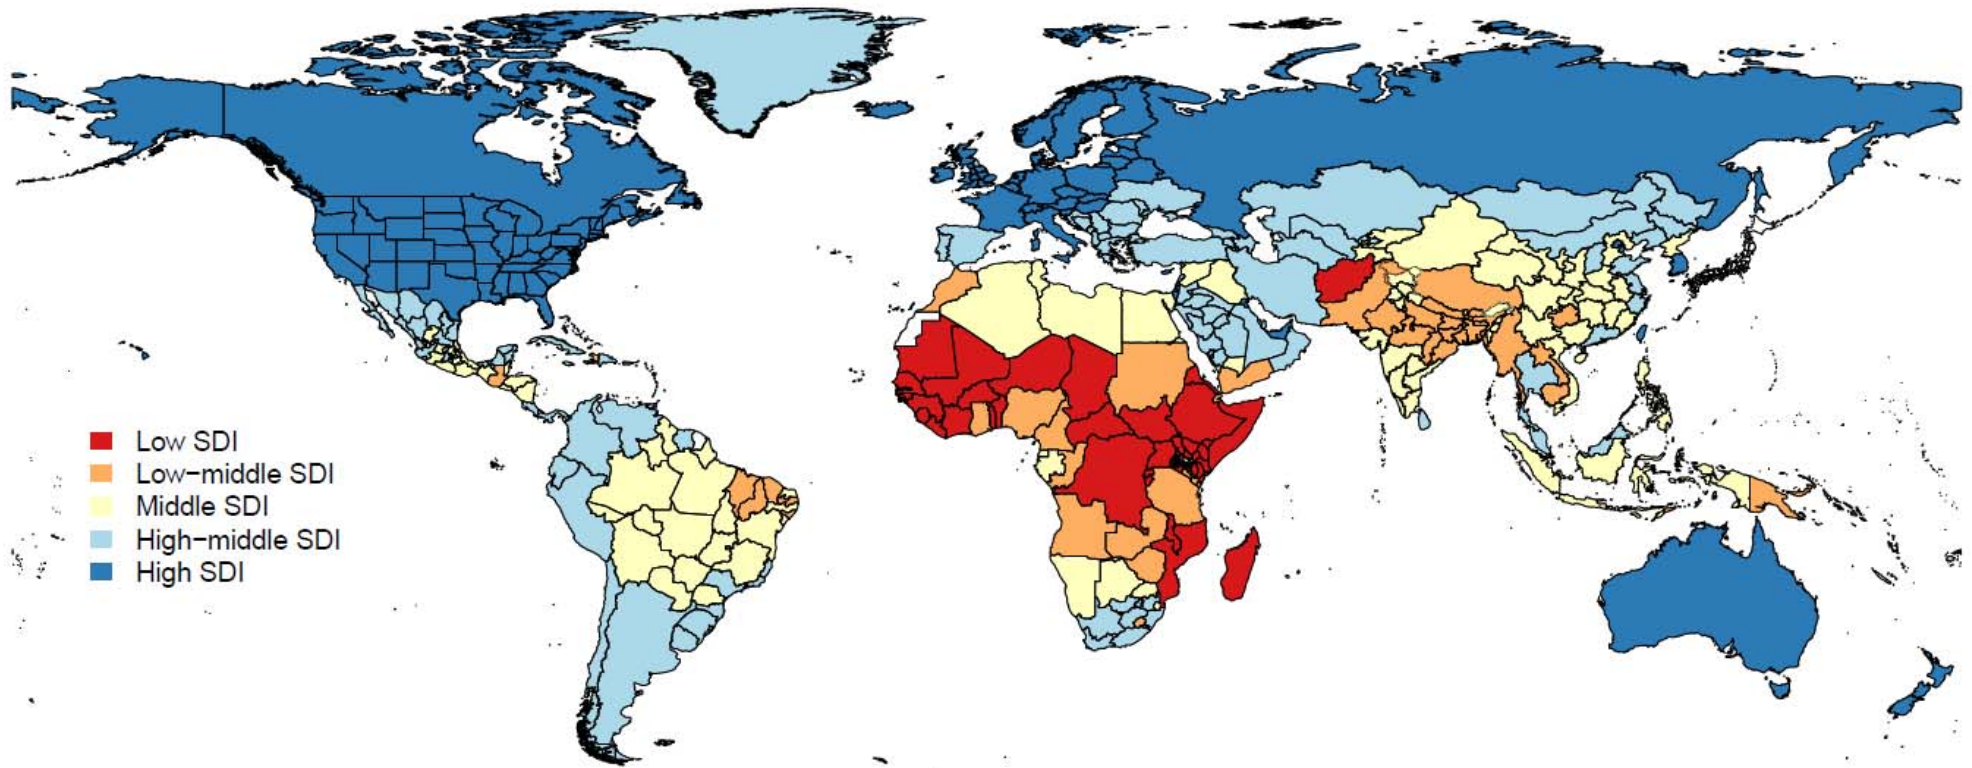

- Low SDI
- Low-middle SDI
- Middle SDI
- High-middle SDI
- High SDI

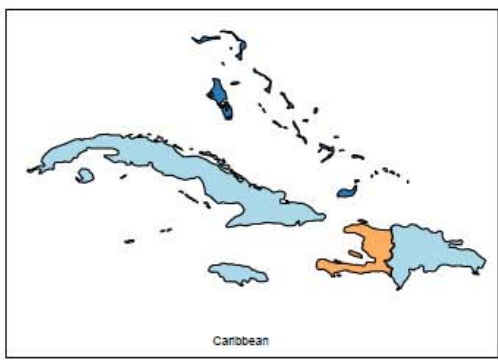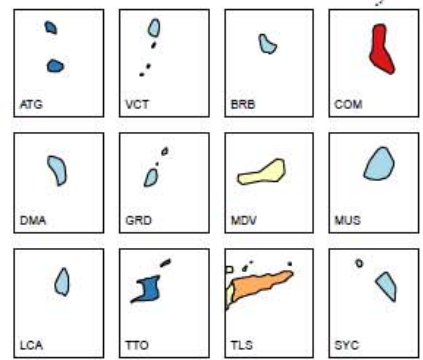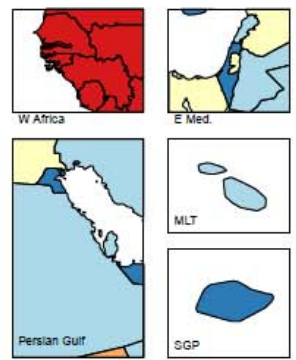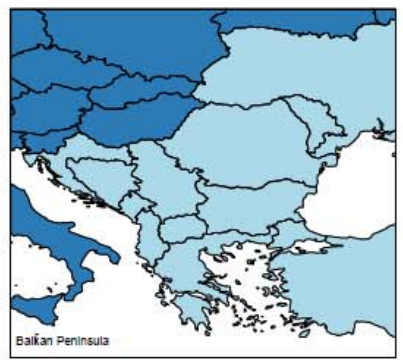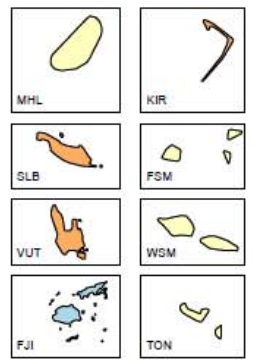

eFigure 3: Sociodemographic Index quintiles, 2015

436  
437  
438

## Appendix B – Additional results

*eTable 8: Age-standardized incidence rates with 95% uncertainty interval and male to female ratio by region, by sex, 2015*

| Region                     | Cancer                           | ASIR 2015, male | 95% UI ASIR 2015, male | ASIR 2015, female | 95% UI ASIR 2015, female | Ratio ASIR Male/Female |
|----------------------------|----------------------------------|-----------------|------------------------|-------------------|--------------------------|------------------------|
| Andean Latin America       | Liver cancer                     | 7               | (5.8, 8.7)             | 7.5               | (5.2, 9.9)               | 0.9                    |
| Andean Latin America       | Liver cancer due to alcohol use  | 2.4             | (2.0, 2.9)             | 1.1               | (0.8, 1.4)               | 2.2                    |
| Andean Latin America       | Liver cancer due to hepatitis B  | 3.1             | (2.5, 3.9)             | 3.3               | (2.2, 4.3)               | 0.9                    |
| Andean Latin America       | Liver cancer due to hepatitis C  | 0.6             | (0.4, 0.7)             | 1.2               | (0.8, 1.6)               | 0.5                    |
| Andean Latin America       | Liver cancer due to other causes | 0.9             | (0.7, 1.2)             | 1.9               | (1.3, 2.7)               | 0.5                    |
| Australasia                | Liver cancer                     | 9.5             | (6.9, 13.8)            | 3.6               | (2.4, 6.2)               | 2.6                    |
| Australasia                | Liver cancer due to alcohol use  | 4.7             | (3.3, 6.6)             | 0.7               | (0.5, 1.1)               | 6.7                    |
| Australasia                | Liver cancer due to hepatitis B  | 1               | (0.7, 1.3)             | 0.4               | (0.3, 0.6)               | 2.5                    |
| Australasia                | Liver cancer due to hepatitis C  | 3.1             | (2.2, 4.7)             | 1.7               | (1.1, 3.1)               | 1.8                    |
| Australasia                | Liver cancer due to other causes | 0.8             | (0.6, 1.2)             | 0.8               | (0.5, 1.4)               | 1.0                    |
| Caribbean                  | Liver cancer                     | 7.4             | (6.5, 8.7)             | 6.2               | (5.1, 7.8)               | 1.2                    |
| Caribbean                  | Liver cancer due to alcohol use  | 2.5             | (2.1, 3.1)             | 1                 | (0.8, 1.3)               | 2.5                    |
| Caribbean                  | Liver cancer due to hepatitis B  | 2.1             | (1.8, 2.6)             | 1.4               | (1.1, 1.8)               | 1.5                    |
| Caribbean                  | Liver cancer due to hepatitis C  | 1.7             | (1.4, 2.1)             | 2.3               | (1.8, 3.0)               | 0.7                    |
| Caribbean                  | Liver cancer due to other causes | 1.1             | (0.9, 1.3)             | 1.5               | (1.2, 2.0)               | 0.7                    |
| Central Asia               | Liver cancer                     | 11.6            | (10.0, 12.8)           | 6.2               | (4.9, 7.3)               | 1.9                    |
| Central Asia               | Liver cancer due to alcohol use  | 2.9             | (2.5, 3.3)             | 0.8               | (0.6, 1.0)               | 3.6                    |
| Central Asia               | Liver cancer due to hepatitis B  | 3.6             | (3.1, 4.1)             | 1.4               | (1.1, 1.7)               | 2.6                    |
| Central Asia               | Liver cancer due to hepatitis C  | 3.9             | (3.3, 4.4)             | 2.9               | (2.3, 3.5)               | 1.3                    |
| Central Asia               | Liver cancer due to other causes | 1.2             | (1.0, 1.4)             | 1                 | (0.8, 1.2)               | 1.2                    |
| Central Europe             | Liver cancer                     | 9.6             | (8.4, 11.4)            | 4.9               | (3.9, 6.1)               | 2.0                    |
| Central Europe             | Liver cancer due to alcohol use  | 5.1             | (4.3, 6.2)             | 1.6               | (1.2, 2.1)               | 3.2                    |
| Central Europe             | Liver cancer due to hepatitis B  | 1.7             | (1.4, 2.2)             | 0.8               | (0.6, 1.0)               | 2.1                    |
| Central Europe             | Liver cancer due to hepatitis C  | 2.1             | (1.6, 2.7)             | 1.8               | (1.4, 2.4)               | 1.2                    |
| Central Europe             | Liver cancer due to other causes | 0.7             | (0.6, 0.9)             | 0.7               | (0.6, 0.9)               | 1.0                    |
| Central Latin America      | Liver cancer                     | 6.6             | (6.2, 7.7)             | 6.7               | (5.9, 8.5)               | 1.0                    |
| Central Latin America      | Liver cancer due to alcohol use  | 2.5             | (2.3, 3.0)             | 1.2               | (1.0, 1.5)               | 2.1                    |
| Central Latin America      | Liver cancer due to hepatitis B  | 0.6             | (0.5, 0.7)             | 0.4               | (0.3, 0.5)               | 1.5                    |
| Central Latin America      | Liver cancer due to hepatitis C  | 2.5             | (2.3, 3.0)             | 3.7               | (3.3, 4.9)               | 0.7                    |
| Central Latin America      | Liver cancer due to other causes | 1               | (0.9, 1.2)             | 1.4               | (1.2, 1.8)               | 0.7                    |
| Central Sub-Saharan Africa | Liver cancer                     | 24.4            | (13.4, 42.7)           | 10.6              | (6.1, 18.5)              | 2.3                    |
| Central Sub-Saharan Africa | Liver cancer due to alcohol use  | 8.7             | (4.8, 14.8)            | 2                 | (1.1, 3.3)               | 4.4                    |
| Central Sub-Saharan Africa | Liver cancer due to hepatitis B  | 4.3             | (2.2, 7.8)             | 1.7               | (1.0, 2.9)               | 2.5                    |
| Central Sub-Saharan Africa | Liver cancer due to hepatitis C  | 8.9             | (4.9, 15.8)            | 4.9               | (2.9, 8.7)               | 1.8                    |
| Central Sub-Saharan Africa | Liver cancer due to other causes | 2.5             | (1.4, 4.6)             | 2                 | (1.1, 3.5)               | 1.3                    |
| East Asia                  | Liver cancer                     | 36.4            | (28.6, 48.0)           | 12.5              | (9.0, 18.2)              | 2.9                    |
| East Asia                  | Liver cancer due to alcohol use  | 13              | (10.3, 17.2)           | 2.2               | (1.5, 3.3)               | 5.9                    |
| East Asia                  | Liver cancer due to hepatitis B  | 15.1            | (11.5, 20.2)           | 4.7               | (3.4, 6.8)               | 3.2                    |

| Region                       | Cancer                           | ASIR 2015, male | 95% UI ASIR 2015, male | ASIR 2015, female | 95% UI ASIR 2015, female | Ratio ASIR Male/Female |
|------------------------------|----------------------------------|-----------------|------------------------|-------------------|--------------------------|------------------------|
| East Asia                    | Liver cancer due to hepatitis C  | 2.8             | (2.2, 3.8)             | 1.7               | (1.2, 2.4)               | 1.6                    |
| East Asia                    | Liver cancer due to other causes | 5.4             | (4.2, 7.2)             | 3.9               | (2.8, 5.8)               | 1.4                    |
| Eastern Europe               | Liver cancer                     | 8.2             | (6.9, 10.3)            | 4.2               | (3.1, 6.4)               | 2.0                    |
| Eastern Europe               | Liver cancer due to alcohol use  | 4.7             | (4.0, 5.9)             | 1.8               | (1.3, 2.8)               | 2.6                    |
| Eastern Europe               | Liver cancer due to hepatitis B  | 1.6             | (1.3, 2.1)             | 0.7               | (0.5, 1.0)               | 2.3                    |
| Eastern Europe               | Liver cancer due to hepatitis C  | 1.4             | (1.1, 1.8)             | 1.3               | (0.9, 2.1)               | 1.1                    |
| Eastern Europe               | Liver cancer due to other causes | 0.5             | (0.4, 0.6)             | 0.5               | (0.3, 0.7)               | 1.0                    |
| Eastern Sub-Saharan Africa   | Liver cancer                     | 13.8            | (10.0, 18.4)           | 7.3               | (4.9, 10.7)              | 1.9                    |
| Eastern Sub-Saharan Africa   | Liver cancer due to alcohol use  | 5.7             | (4.1, 7.6)             | 1.5               | (1.0, 2.2)               | 3.8                    |
| Eastern Sub-Saharan Africa   | Liver cancer due to hepatitis B  | 3.2             | (2.2, 4.5)             | 1.4               | (0.9, 2.1)               | 2.3                    |
| Eastern Sub-Saharan Africa   | Liver cancer due to hepatitis C  | 3.4             | (2.5, 4.6)             | 3.1               | (2.1, 4.6)               | 1.1                    |
| Eastern Sub-Saharan Africa   | Liver cancer due to other causes | 1.4             | (1.0, 1.9)             | 1.3               | (0.9, 1.9)               | 1.1                    |
| High-income Asia Pacific     | Liver cancer                     | 40.1            | (34.4, 48.3)           | 14.2              | (10.9, 19.6)             | 2.8                    |
| High-income Asia Pacific     | Liver cancer due to alcohol use  | 9               | (7.5, 11.1)            | 1.5               | (1.1, 2.0)               | 6.0                    |
| High-income Asia Pacific     | Liver cancer due to hepatitis B  | 10.5            | (9.0, 12.2)            | 2.9               | (2.3, 3.7)               | 3.6                    |
| High-income Asia Pacific     | Liver cancer due to hepatitis C  | 19              | (15.7, 23.9)           | 8.7               | (6.3, 12.7)              | 2.2                    |
| High-income Asia Pacific     | Liver cancer due to other causes | 1.7             | (1.4, 2.0)             | 1.2               | (0.9, 1.6)               | 1.4                    |
| High-income North America    | Liver cancer                     | 11.6            | (9.4, 14.3)            | 4.3               | (3.2, 7.0)               | 2.7                    |
| High-income North America    | Liver cancer due to alcohol use  | 5.5             | (4.5, 6.9)             | 0.6               | (0.5, 0.9)               | 9.2                    |
| High-income North America    | Liver cancer due to hepatitis B  | 1.4             | (1.1, 1.7)             | 0.4               | (0.3, 0.5)               | 3.5                    |
| High-income North America    | Liver cancer due to hepatitis C  | 2.6             | (2.1, 3.2)             | 1.9               | (1.4, 3.2)               | 1.4                    |
| High-income North America    | Liver cancer due to other causes | 2.1             | (1.7, 2.5)             | 1.4               | (1.1, 2.3)               | 1.5                    |
| North Africa and Middle East | Liver cancer                     | 8.1             | (7.1, 9.1)             | 4.7               | (3.7, 5.4)               | 1.7                    |
| North Africa and Middle East | Liver cancer due to alcohol use  | 1.4             | (1.0, 1.8)             | 0.3               | (0.2, 0.4)               | 4.7                    |
| North Africa and Middle East | Liver cancer due to hepatitis B  | 2.2             | (1.7, 2.6)             | 1                 | (0.7, 1.2)               | 2.2                    |
| North Africa and Middle East | Liver cancer due to hepatitis C  | 3.5             | (3.0, 4.1)             | 2.4               | (1.9, 2.9)               | 1.5                    |
| North Africa and Middle East | Liver cancer due to other causes | 1.1             | (0.9, 1.3)             | 1                 | (0.7, 1.3)               | 1.1                    |
| Oceania                      | Liver cancer                     | 12.5            | (8.8, 17.8)            | 9.3               | (5.7, 14.0)              | 1.3                    |
| Oceania                      | Liver cancer due to alcohol use  | 2.8             | (2.0, 4.2)             | 0.9               | (0.5, 1.3)               | 3.1                    |
| Oceania                      | Liver cancer due to hepatitis B  | 4.6             | (3.2, 6.9)             | 2.7               | (1.6, 4.2)               | 1.7                    |
| Oceania                      | Liver cancer due to hepatitis C  | 2.2             | (1.6, 3.3)             | 2.4               | (1.5, 3.7)               | 0.9                    |
| Oceania                      | Liver cancer due to other causes | 2.8             | (2.0, 4.1)             | 3.3               | (2.0, 4.9)               | 0.8                    |
| South Asia                   | Liver cancer                     | 4.7             | (3.8, 6.2)             | 3.2               | (2.4, 4.5)               | 1.5                    |

| Region                      | Cancer                           | ASIR 2015, male | 95% UI ASIR 2015, male | ASIR 2015, female | 95% UI ASIR 2015, female | Ratio ASIR Male/Female |
|-----------------------------|----------------------------------|-----------------|------------------------|-------------------|--------------------------|------------------------|
| South Asia                  | Liver cancer due to alcohol use  | 1.1             | (0.9, 1.5)             | 0.3               | (0.2, 0.5)               | 3.7                    |
| South Asia                  | Liver cancer due to hepatitis B  | 1.9             | (1.5, 2.5)             | 0.9               | (0.7, 1.3)               | 2.1                    |
| South Asia                  | Liver cancer due to hepatitis C  | 1               | (0.8, 1.3)             | 1.2               | (0.9, 1.7)               | 0.8                    |
| South Asia                  | Liver cancer due to other causes | 0.7             | (0.6, 1.0)             | 0.8               | (0.6, 1.1)               | 0.9                    |
| Southeast Asia              | Liver cancer                     | 20.2            | (16.0, 25.4)           | 8.6               | (6.1, 11.2)              | 2.3                    |
| Southeast Asia              | Liver cancer due to alcohol use  | 7.5             | (5.7, 9.7)             | 1.6               | (1.0, 2.2)               | 4.7                    |
| Southeast Asia              | Liver cancer due to hepatitis B  | 5.2             | (3.9, 6.6)             | 1.7               | (1.2, 2.3)               | 3.1                    |
| Southeast Asia              | Liver cancer due to hepatitis C  | 4.1             | (3.0, 5.4)             | 2.7               | (1.8, 3.8)               | 1.5                    |
| Southeast Asia              | Liver cancer due to other causes | 3.5             | (2.7, 4.5)             | 2.6               | (1.9, 3.3)               | 1.3                    |
| Southern Latin America      | Liver cancer                     | 6.1             | (5.4, 7.3)             | 4                 | (3.3, 5.2)               | 1.5                    |
| Southern Latin America      | Liver cancer due to alcohol use  | 3.6             | (3.1, 4.3)             | 0.9               | (0.7, 1.1)               | 4.0                    |
| Southern Latin America      | Liver cancer due to hepatitis B  | 0.5             | (0.4, 0.6)             | 0.2               | (0.2, 0.2)               | 2.5                    |
| Southern Latin America      | Liver cancer due to hepatitis C  | 1.5             | (1.3, 1.8)             | 2.4               | (1.9, 3.1)               | 0.6                    |
| Southern Latin America      | Liver cancer due to other causes | 0.5             | (0.4, 0.7)             | 0.6               | (0.5, 0.8)               | 0.8                    |
| Southern Sub-Saharan Africa | Liver cancer                     | 12.3            | (9.8, 15.9)            | 5.8               | (4.2, 8.2)               | 2.1                    |
| Southern Sub-Saharan Africa | Liver cancer due to alcohol use  | 6               | (5.0, 7.7)             | 1.6               | (1.2, 2.3)               | 3.8                    |
| Southern Sub-Saharan Africa | Liver cancer due to hepatitis B  | 3.4             | (2.5, 4.5)             | 1.4               | (1.0, 2.0)               | 2.4                    |
| Southern Sub-Saharan Africa | Liver cancer due to hepatitis C  | 1.9             | (1.5, 2.5)             | 1.9               | (1.4, 2.8)               | 1.0                    |
| Southern Sub-Saharan Africa | Liver cancer due to other causes | 1               | (0.7, 1.3)             | 0.9               | (0.6, 1.4)               | 1.1                    |
| Tropical Latin America      | Liver cancer                     | 6.5             | (5.5, 8.2)             | 4.5               | (3.5, 6.5)               | 1.4                    |
| Tropical Latin America      | Liver cancer due to alcohol use  | 2.6             | (2.1, 3.2)             | 1                 | (0.7, 1.4)               | 2.6                    |
| Tropical Latin America      | Liver cancer due to hepatitis B  | 1.5             | (1.2, 1.9)             | 0.6               | (0.5, 0.9)               | 2.5                    |
| Tropical Latin America      | Liver cancer due to hepatitis C  | 1.9             | (1.6, 2.5)             | 2                 | (1.5, 3.0)               | 1.0                    |
| Tropical Latin America      | Liver cancer due to other causes | 0.6             | (0.5, 0.7)             | 0.9               | (0.7, 1.3)               | 0.7                    |
| Western Europe              | Liver cancer                     | 13.3            | (11.5, 15.4)           | 5.2               | (4.1, 6.9)               | 2.6                    |
| Western Europe              | Liver cancer due to alcohol use  | 5.1             | (4.3, 6.0)             | 1                 | (0.8, 1.2)               | 5.1                    |
| Western Europe              | Liver cancer due to hepatitis B  | 2.2             | (1.7, 2.7)             | 0.7               | (0.5, 0.9)               | 3.1                    |
| Western Europe              | Liver cancer due to hepatitis C  | 4.9             | (4.1, 6.1)             | 2.8               | (2.1, 4.0)               | 1.8                    |
| Western Europe              | Liver cancer due to other causes | 1.1             | (0.9, 1.4)             | 0.7               | (0.5, 0.9)               | 1.6                    |
| Western Sub-Saharan Africa  | Liver cancer                     | 23.4            | (16.8, 33.9)           | 10.9              | (7.0, 15.8)              | 2.1                    |
| Western Sub-Saharan Africa  | Liver cancer due to alcohol use  | 8.9             | (5.9, 13.6)            | 2.8               | (1.6, 4.6)               | 3.2                    |
| Western Sub-Saharan Africa  | Liver cancer due to hepatitis B  | 9.2             | (6.5, 13.3)            | 3.6               | (2.3, 5.3)               | 2.6                    |
| Western Sub-Saharan Africa  | Liver cancer due to hepatitis C  | 2.6             | (1.8, 3.7)             | 2.1               | (1.4, 3.2)               | 1.2                    |
| Western Sub-Saharan Africa  | Liver cancer due to other causes | 2.8             | (2.1, 3.7)             | 2.3               | (1.5, 3.2)               | 1.2                    |

eTable 9: Global liver cancer incident cases, age-standardized incidence rate, deaths, age-standardized mortality rate, DALYs, and age-standardized DALYs attributable to each cause group by year and percent change (both sexes)

| Year | Etiology    | Incident cases<br>(thousands with<br>95% UI) | ASIR (per<br>100,000 with<br>95% UI) | Deaths<br>(thousands with 95%<br>UI) | ASMR (per<br>100,000 with 95%<br>UI) | DALYs<br>(thousands with<br>95% UI) | Age-standardized<br>DALY rate (per<br>100,000 with 95%<br>UI) |
|------|-------------|----------------------------------------------|--------------------------------------|--------------------------------------|--------------------------------------|-------------------------------------|---------------------------------------------------------------|
| 1990 | Hepatitis B | 191 (154, 227)                               | 4.8 (3.9, 5.7)                       | 202 (165, 222)                       | 5.2 (4.3, 5.7)                       | 6685 (5312, 7361)                   | 158.7 (126.9,<br>174.5)                                       |
|      | Hepatitis C | 91 (84, 99)                                  | 2.7 (2.4, 2.9)                       | 93 (85, 100)                         | 2.7 (2.5, 2.9)                       | 2121 (1903, 2303)                   | 56.9 (51.4, 61.7)                                             |
|      | Alcohol     | 119 (102, 134)                               | 3.3 (2.8, 3.7)                       | 129 (112, 142)                       | 3.6 (3.1, 3.9)                       | 3265 (2766, 3606)                   | 86.0 (73.4, 94.9)                                             |
|      | Other       | 88 (73, 102)                                 | 2.3 (2.0, 2.7)                       | 94 (79, 103)                         | 2.5 (2.1, 2.8)                       | 2722 (2224, 2998)                   | 67.0 (55.3, 73.9)                                             |
| 1995 | Hepatitis B | 215 (176, 248)                               | 4.8 (4.0, 5.5)                       | 224 (186, 241)                       | 5.1 (4.3, 5.5)                       | 7449 (5991, 8002)                   | 157.2 (128.0,<br>168.8)                                       |
|      | Hepatitis C | 108 (100, 115)                               | 2.8 (2.6, 3.0)                       | 108 (99, 116)                        | 2.8 (2.6, 3.0)                       | 2405 (2174, 2587)                   | 57.9 (52.6, 62.2)                                             |
|      | Alcohol     | 141 (123, 156)                               | 3.5 (3.1, 3.9)                       | 152 (132, 164)                       | 3.8 (3.3, 4.1)                       | 3849 (3244, 4171)                   | 90.6 (77.0, 98.0)                                             |
|      | Other       | 96 (81, 109)                                 | 2.3 (2.0, 2.6)                       | 102 (86, 110)                        | 2.5 (2.1, 2.7)                       | 2916 (2409, 3183)                   | 64.1 (53.6, 69.9)                                             |
| 2000 | Hepatitis B | 243 (195, 278)                               | 4.9 (3.9, 5.5)                       | 251 (203, 268)                       | 5.1 (4.2, 5.5)                       | 8230 (6535, 8788)                   | 155.8 (124.6,<br>166.2)                                       |
|      | Hepatitis C | 124 (113, 133)                               | 2.9 (2.6, 3.1)                       | 125 (114, 133)                       | 2.9 (2.7, 3.1)                       | 2711 (2431, 2917)                   | 58.4 (52.6, 62.7)                                             |
|      | Alcohol     | 166 (140, 183)                               | 3.6 (3.1, 4.0)                       | 178 (150, 191)                       | 3.9 (3.3, 4.2)                       | 4424 (3663, 4768)                   | 92.9 (77.4, 100.1)                                            |
|      | Other       | 115 (96, 131)                                | 2.5 (2.1, 2.8)                       | 120 (102, 130)                       | 2.6 (2.2, 2.8)                       | 3351 (2723, 3639)                   | 66.2 (54.6, 72.0)                                             |
| 2005 | Hepatitis B | 257 (215, 297)                               | 4.6 (3.9, 5.3)                       | 263 (224, 283)                       | 4.8 (4.1, 5.1)                       | 8421 (7092, 9020)                   | 143.4 (121.3,<br>153.7)                                       |
|      | Hepatitis C | 139 (127, 149)                               | 2.9 (2.6, 3.1)                       | 138 (126, 146)                       | 2.8 (2.6, 3.0)                       | 2897 (2608, 3109)                   | 55.5 (50.1, 59.5)                                             |
|      | Alcohol     | 185 (161, 204)                               | 3.6 (3.1, 4.0)                       | 195 (169, 208)                       | 3.8 (3.3, 4.1)                       | 4787 (4075, 5169)                   | 89.2 (76.2, 96.3)                                             |

|                                                                                                                                                                  |             |                     |                    |                    |                      |                    |                      |
|------------------------------------------------------------------------------------------------------------------------------------------------------------------|-------------|---------------------|--------------------|--------------------|----------------------|--------------------|----------------------|
|                                                                                                                                                                  | Other       | 127 (108, 145)      | 2.4 (2.1, 2.8)     | 131 (114, 142)     | 2.5 (2.2, 2.7)       | 3539 (3023, 3830)  | 62.9 (54.1, 68.1)    |
| 2010                                                                                                                                                             | Hepatitis B | 260 (229, 302)      | 4.2 (3.7, 4.8)     | 261 (236, 280)     | 4.2 (3.8, 4.5)       | 8107 (7372, 8686)  | 124.3 (112.9, 133.4) |
|                                                                                                                                                                  | Hepatitis C | 162 (149, 173)      | 2.9 (2.7, 3.1)     | 150 (138, 160)     | 2.7 (2.5, 2.9)       | 3051 (2764, 3264)  | 51.7 (47.0, 55.2)    |
|                                                                                                                                                                  | Alcohol     | 210 (190, 232)      | 3.6 (3.3, 4.0)     | 215 (195, 232)     | 3.7 (3.4, 4.0)       | 5203 (4707, 5657)  | 85.7 (77.6, 93.0)    |
|                                                                                                                                                                  | Other       | 129 (113, 147)      | 2.2 (1.9, 2.5)     | 130 (117, 140)     | 2.2 (2.0, 2.4)       | 3356 (3014, 3624)  | 53.6 (48.1, 57.8)    |
| 2015                                                                                                                                                             | Hepatitis B | 272 (235, 327)      | 3.9 (3.4, 4.7)     | 265 (241, 291)     | 3.8 (3.5, 4.2)       | 8029 (7280, 8796)  | 110.6 (100.4, 121.2) |
|                                                                                                                                                                  | Hepatitis C | 196 (178, 217)      | 3.1 (2.8, 3.4)     | 167 (154, 178)     | 2.6 (2.4, 2.8)       | 3324 (3012, 3574)  | 49.3 (44.9, 52.9)    |
|                                                                                                                                                                  | Alcohol     | 249 (221, 287)      | 3.7 (3.3, 4.3)     | 245 (225, 267)     | 3.7 (3.4, 4.0)       | 5889 (5368, 6441)  | 84.8 (77.5, 92.7)    |
|                                                                                                                                                                  | Other       | 137 (120, 158)      | 2.1 (1.8, 2.4)     | 133 (120, 144)     | 2.0 (1.8, 2.2)       | 3336 (3019, 3638)  | 47.4 (42.9, 51.6)    |
| Percent change between 1990 and 2015 (%)                                                                                                                         | Hepatitis B | 42.4 (14.8, 78.7)   | -18.9 (-34.1, 0.7) | 30.1 (19.0, 53.8)  | -26.5 (-32.7, -14.3) | 20.1 (8.3, 45.9)   | -30.3 (-37.1, -16.4) |
|                                                                                                                                                                  | Hepatitis C | 114.3 (94.0, 138.0) | 15.7 (4.3, 29.4)   | 79.3 (70.3, 92.7)  | -3.3 (-8.0, 3.4)     | 56.7 (47.3, 69.6)  | -13.4 (-18.3, -6.5)  |
|                                                                                                                                                                  | Alcohol     | 109.3 (79.6, 146.0) | 13.5 (-2.1, 32.5)  | 89.5 (74.1, 110.1) | 2.9 (-5.2, 13.4)     | 80.3 (64.0, 104.5) | -1.4 (-10.2, 11.3)   |
|                                                                                                                                                                  | Other       | 56.4 (30.3, 89.5)   | -12.3 (-26.8, 5.7) | 40.3 (29.9, 59.9)  | -21.8 (-27.3, -12.0) | 22.6 (11.5, 42.7)  | -29.2 (-35.4, -18.4) |
| <b>Abbreviations</b> UI: uncertainty interval, ASIR: age-standardized incidence rate, ASMR: age-standardized mortality rate, DALY: disability-adjusted life-year |             |                     |                    |                    |                      |                    |                      |

*eTable 10: Contribution of hepatitis B, C, alcohol and other causes on absolute liver cancer deaths, 2015, both sexes, by location*

| <b>Location</b>          | <b>Liver Cancer Due To Alcohol Use</b> | <b>Liver Cancer Due To Hepatitis B</b> | <b>Liver Cancer Due To Hepatitis C</b> | <b>Liver Cancer Due To Other Causes</b> |
|--------------------------|----------------------------------------|----------------------------------------|----------------------------------------|-----------------------------------------|
| Afghanistan              | 11%                                    | 36%                                    | 32%                                    | 21%                                     |
| Albania                  | 20%                                    | 23%                                    | 41%                                    | 16%                                     |
| Algeria                  | 14%                                    | 32%                                    | 35%                                    | 19%                                     |
| American Samoa           | 16%                                    | 39%                                    | 18%                                    | 27%                                     |
| Andorra                  | 47%                                    | 15%                                    | 31%                                    | 7%                                      |
| Angola                   | 37%                                    | 20%                                    | 32%                                    | 12%                                     |
| Antigua and Barbuda      | 19%                                    | 29%                                    | 31%                                    | 22%                                     |
| Argentina                | 44%                                    | 6%                                     | 39%                                    | 10%                                     |
| Armenia                  | 15%                                    | 28%                                    | 42%                                    | 15%                                     |
| Australia                | 38%                                    | 9%                                     | 40%                                    | 13%                                     |
| Austria                  | 49%                                    | 15%                                    | 30%                                    | 6%                                      |
| Azerbaijan               | 15%                                    | 32%                                    | 40%                                    | 14%                                     |
| Bahrain                  | 17%                                    | 39%                                    | 28%                                    | 16%                                     |
| Bangladesh               | 11%                                    | 33%                                    | 34%                                    | 22%                                     |
| Barbados                 | 24%                                    | 25%                                    | 31%                                    | 19%                                     |
| Belarus                  | 63%                                    | 13%                                    | 19%                                    | 5%                                      |
| Belgium                  | 48%                                    | 16%                                    | 28%                                    | 8%                                      |
| Belize                   | 23%                                    | 31%                                    | 27%                                    | 20%                                     |
| Benin                    | 25%                                    | 47%                                    | 11%                                    | 18%                                     |
| Bermuda                  | 27%                                    | 25%                                    | 30%                                    | 18%                                     |
| Bhutan                   | 19%                                    | 34%                                    | 28%                                    | 19%                                     |
| Bolivia                  | 18%                                    | 48%                                    | 13%                                    | 22%                                     |
| Bosnia and Herzegovina   | 29%                                    | 20%                                    | 37%                                    | 14%                                     |
| Botswana                 | 43%                                    | 32%                                    | 15%                                    | 10%                                     |
| Brazil                   | 32%                                    | 20%                                    | 35%                                    | 13%                                     |
| Brunei                   | 8%                                     | 48%                                    | 34%                                    | 10%                                     |
| Bulgaria                 | 40%                                    | 18%                                    | 30%                                    | 12%                                     |
| Burkina Faso             | 24%                                    | 48%                                    | 12%                                    | 16%                                     |
| Burundi                  | 47%                                    | 20%                                    | 23%                                    | 10%                                     |
| Cambodia                 | 34%                                    | 25%                                    | 19%                                    | 22%                                     |
| Cameroon                 | 47%                                    | 32%                                    | 11%                                    | 11%                                     |
| Canada                   | 31%                                    | 9%                                     | 34%                                    | 27%                                     |
| Cape Verde               | 47%                                    | 31%                                    | 9%                                     | 12%                                     |
| Central African Republic | 24%                                    | 20%                                    | 40%                                    | 15%                                     |
| Chad                     | 19%                                    | 51%                                    | 12%                                    | 18%                                     |
| Chile                    | 38%                                    | 6%                                     | 43%                                    | 12%                                     |
| China                    | 33%                                    | 41%                                    | 8%                                     | 18%                                     |
| Colombia                 | 26%                                    | 15%                                    | 42%                                    | 17%                                     |
| Comoros                  | 11%                                    | 34%                                    | 36%                                    | 19%                                     |
| Congo                    | 27%                                    | 21%                                    | 39%                                    | 14%                                     |

| <b>Location</b>                  | <b>Liver Cancer Due To Alcohol Use</b> | <b>Liver Cancer Due To Hepatitis B</b> | <b>Liver Cancer Due To Hepatitis C</b> | <b>Liver Cancer Due To Other Causes</b> |
|----------------------------------|----------------------------------------|----------------------------------------|----------------------------------------|-----------------------------------------|
| Costa Rica                       | 28%                                    | 9%                                     | 45%                                    | 17%                                     |
| Cote d'Ivoire                    | 35%                                    | 39%                                    | 11%                                    | 15%                                     |
| Croatia                          | 54%                                    | 19%                                    | 17%                                    | 10%                                     |
| Cuba                             | 22%                                    | 25%                                    | 32%                                    | 20%                                     |
| Cyprus                           | 32%                                    | 19%                                    | 39%                                    | 10%                                     |
| Czech Republic                   | 51%                                    | 16%                                    | 23%                                    | 10%                                     |
| Democratic Republic of the Congo | 27%                                    | 21%                                    | 39%                                    | 14%                                     |
| Denmark                          | 49%                                    | 15%                                    | 29%                                    | 6%                                      |
| Djibouti                         | 13%                                    | 33%                                    | 36%                                    | 18%                                     |
| Dominica                         | 24%                                    | 27%                                    | 30%                                    | 19%                                     |
| Dominican Republic               | 26%                                    | 26%                                    | 29%                                    | 19%                                     |
| Ecuador                          | 23%                                    | 45%                                    | 12%                                    | 20%                                     |
| Egypt                            | 12%                                    | 13%                                    | 63%                                    | 12%                                     |
| El Salvador                      | 17%                                    | 11%                                    | 50%                                    | 23%                                     |
| England                          | 36%                                    | 17%                                    | 38%                                    | 9%                                      |
| Equatorial Guinea                | 47%                                    | 17%                                    | 27%                                    | 9%                                      |
| Eritrea                          | 20%                                    | 30%                                    | 32%                                    | 18%                                     |
| Estonia                          | 61%                                    | 11%                                    | 22%                                    | 6%                                      |
| Ethiopia                         | 32%                                    | 26%                                    | 29%                                    | 13%                                     |
| Federated States of Micronesia   | 18%                                    | 36%                                    | 19%                                    | 27%                                     |
| Fiji                             | 21%                                    | 35%                                    | 18%                                    | 26%                                     |
| Finland                          | 37%                                    | 16%                                    | 38%                                    | 9%                                      |
| France                           | 37%                                    | 17%                                    | 36%                                    | 9%                                      |
| Gabon                            | 45%                                    | 15%                                    | 31%                                    | 9%                                      |
| Georgia                          | 19%                                    | 28%                                    | 39%                                    | 13%                                     |
| Germany                          | 44%                                    | 8%                                     | 33%                                    | 14%                                     |
| Ghana                            | 33%                                    | 45%                                    | 9%                                     | 13%                                     |
| Greece                           | 31%                                    | 33%                                    | 27%                                    | 9%                                      |
| Greenland                        | 43%                                    | 10%                                    | 28%                                    | 20%                                     |
| Grenada                          | 30%                                    | 26%                                    | 27%                                    | 17%                                     |
| Guam                             | 17%                                    | 36%                                    | 19%                                    | 27%                                     |
| Guatemala                        | 15%                                    | 12%                                    | 49%                                    | 25%                                     |
| Guinea                           | 12%                                    | 56%                                    | 12%                                    | 20%                                     |
| Guinea-Bissau                    | 18%                                    | 51%                                    | 13%                                    | 19%                                     |
| Guyana                           | 30%                                    | 29%                                    | 24%                                    | 16%                                     |
| Haiti                            | 24%                                    | 29%                                    | 28%                                    | 19%                                     |
| Honduras                         | 17%                                    | 11%                                    | 49%                                    | 23%                                     |
| Hungary                          | 52%                                    | 11%                                    | 29%                                    | 8%                                      |
| Iceland                          | 26%                                    | 19%                                    | 42%                                    | 12%                                     |
| India                            | 21%                                    | 42%                                    | 20%                                    | 18%                                     |
| Indonesia                        | 13%                                    | 13%                                    | 34%                                    | 39%                                     |
| Iran                             | 6%                                     | 44%                                    | 24%                                    | 26%                                     |



| <b>Location</b>  | <b>Liver Cancer Due To Alcohol Use</b> | <b>Liver Cancer Due To Hepatitis B</b> | <b>Liver Cancer Due To Hepatitis C</b> | <b>Liver Cancer Due To Other Causes</b> |
|------------------|----------------------------------------|----------------------------------------|----------------------------------------|-----------------------------------------|
| Iraq             | 12%                                    | 37%                                    | 32%                                    | 19%                                     |
| Ireland          | 36%                                    | 18%                                    | 37%                                    | 9%                                      |
| Israel           | 15%                                    | 20%                                    | 49%                                    | 17%                                     |
| Italy            | 20%                                    | 8%                                     | 63%                                    | 9%                                      |
| Jamaica          | 19%                                    | 28%                                    | 31%                                    | 22%                                     |
| Japan            | 17%                                    | 8%                                     | 69%                                    | 6%                                      |
| Jordan           | 15%                                    | 35%                                    | 31%                                    | 19%                                     |
| Kazakhstan       | 36%                                    | 23%                                    | 30%                                    | 10%                                     |
| Kenya            | 37%                                    | 25%                                    | 23%                                    | 15%                                     |
| Kiribati         | 16%                                    | 40%                                    | 17%                                    | 27%                                     |
| Kuwait           | 15%                                    | 37%                                    | 31%                                    | 18%                                     |
| Kyrgyzstan       | 11%                                    | 34%                                    | 40%                                    | 15%                                     |
| Laos             | 36%                                    | 28%                                    | 17%                                    | 20%                                     |
| Latvia           | 34%                                    | 19%                                    | 36%                                    | 11%                                     |
| Lebanon          | 17%                                    | 28%                                    | 40%                                    | 15%                                     |
| Lesotho          | 32%                                    | 34%                                    | 21%                                    | 13%                                     |
| Liberia          | 38%                                    | 39%                                    | 10%                                    | 14%                                     |
| Libya            | 15%                                    | 33%                                    | 34%                                    | 18%                                     |
| Lithuania        | 59%                                    | 13%                                    | 22%                                    | 6%                                      |
| Luxembourg       | 38%                                    | 17%                                    | 36%                                    | 9%                                      |
| Macedonia        | 29%                                    | 21%                                    | 36%                                    | 14%                                     |
| Madagascar       | 23%                                    | 29%                                    | 31%                                    | 17%                                     |
| Malawi           | 19%                                    | 36%                                    | 28%                                    | 17%                                     |
| Malaysia         | 12%                                    | 37%                                    | 14%                                    | 37%                                     |
| Maldives         | 15%                                    | 30%                                    | 25%                                    | 31%                                     |
| Mali             | 13%                                    | 47%                                    | 17%                                    | 23%                                     |
| Malta            | 24%                                    | 19%                                    | 44%                                    | 12%                                     |
| Marshall Islands | 15%                                    | 39%                                    | 18%                                    | 28%                                     |
| Mauritania       | 11%                                    | 53%                                    | 14%                                    | 22%                                     |
| Mauritius        | 29%                                    | 23%                                    | 22%                                    | 26%                                     |
| Mexico           | 30%                                    | 4%                                     | 49%                                    | 17%                                     |
| Moldova          | 61%                                    | 15%                                    | 18%                                    | 6%                                      |
| Mongolia         | 19%                                    | 30%                                    | 39%                                    | 12%                                     |
| Montenegro       | 41%                                    | 17%                                    | 30%                                    | 11%                                     |
| Morocco          | 14%                                    | 31%                                    | 36%                                    | 19%                                     |
| Mozambique       | 23%                                    | 26%                                    | 36%                                    | 15%                                     |
| Myanmar          | 15%                                    | 28%                                    | 24%                                    | 33%                                     |
| Namibia          | 44%                                    | 31%                                    | 15%                                    | 10%                                     |
| Nepal            | 24%                                    | 33%                                    | 24%                                    | 19%                                     |
| Netherlands      | 35%                                    | 18%                                    | 37%                                    | 10%                                     |
| New Zealand      | 44%                                    | 10%                                    | 34%                                    | 12%                                     |
| Nicaragua        | 16%                                    | 11%                                    | 49%                                    | 23%                                     |
| Niger            | 13%                                    | 52%                                    | 14%                                    | 22%                                     |
| Nigeria          | 39%                                    | 42%                                    | 11%                                    | 9%                                      |

| <b>Location</b>                  | <b>Liver Cancer Due To Alcohol Use</b> | <b>Liver Cancer Due To Hepatitis B</b> | <b>Liver Cancer Due To Hepatitis C</b> | <b>Liver Cancer Due To Other Causes</b> |
|----------------------------------|----------------------------------------|----------------------------------------|----------------------------------------|-----------------------------------------|
| North Korea                      | 17%                                    | 42%                                    | 17%                                    | 24%                                     |
| Northern Ireland                 | 34%                                    | 18%                                    | 38%                                    | 10%                                     |
| Northern Mariana Islands         | 15%                                    | 46%                                    | 14%                                    | 26%                                     |
| Norway                           | 25%                                    | 19%                                    | 44%                                    | 12%                                     |
| Oman                             | 17%                                    | 39%                                    | 28%                                    | 16%                                     |
| Pakistan                         | 7%                                     | 16%                                    | 54%                                    | 23%                                     |
| Palestine                        | 13%                                    | 38%                                    | 30%                                    | 19%                                     |
| Panama                           | 34%                                    | 9%                                     | 42%                                    | 15%                                     |
| Papua New Guinea                 | 16%                                    | 39%                                    | 18%                                    | 27%                                     |
| Paraguay                         | 28%                                    | 21%                                    | 37%                                    | 15%                                     |
| Peru                             | 26%                                    | 44%                                    | 11%                                    | 19%                                     |
| Philippines                      | 35%                                    | 29%                                    | 16%                                    | 20%                                     |
| Poland                           | 42%                                    | 16%                                    | 31%                                    | 12%                                     |
| Portugal                         | 37%                                    | 18%                                    | 36%                                    | 9%                                      |
| Puerto Rico                      | 33%                                    | 22%                                    | 29%                                    | 16%                                     |
| Qatar                            | 18%                                    | 38%                                    | 28%                                    | 15%                                     |
| Romania                          | 54%                                    | 13%                                    | 25%                                    | 8%                                      |
| Russia                           | 53%                                    | 15%                                    | 24%                                    | 8%                                      |
| Rwanda                           | 39%                                    | 17%                                    | 34%                                    | 10%                                     |
| Saint Lucia                      | 36%                                    | 24%                                    | 26%                                    | 15%                                     |
| Saint Vincent and the Grenadines | 24%                                    | 29%                                    | 28%                                    | 19%                                     |
| Samoa                            | 19%                                    | 39%                                    | 17%                                    | 25%                                     |
| Sao Tome and Principe            | 45%                                    | 33%                                    | 9%                                     | 12%                                     |
| Saudi Arabia                     | 17%                                    | 41%                                    | 17%                                    | 25%                                     |
| Scotland                         | 36%                                    | 18%                                    | 37%                                    | 9%                                      |
| Senegal                          | 14%                                    | 53%                                    | 7%                                     | 25%                                     |
| Serbia                           | 38%                                    | 11%                                    | 42%                                    | 9%                                      |
| Seychelles                       | 35%                                    | 25%                                    | 19%                                    | 21%                                     |
| Sierra Leone                     | 37%                                    | 39%                                    | 11%                                    | 14%                                     |
| Singapore                        | 10%                                    | 57%                                    | 22%                                    | 11%                                     |
| Slovakia                         | 51%                                    | 15%                                    | 26%                                    | 9%                                      |
| Slovenia                         | 51%                                    | 14%                                    | 26%                                    | 9%                                      |
| Solomon Islands                  | 13%                                    | 44%                                    | 16%                                    | 27%                                     |
| Somalia                          | 15%                                    | 36%                                    | 30%                                    | 18%                                     |
| South Africa                     | 44%                                    | 24%                                    | 23%                                    | 8%                                      |
| South Korea                      | 21%                                    | 54%                                    | 20%                                    | 5%                                      |
| South Sudan                      | 16%                                    | 30%                                    | 37%                                    | 17%                                     |
| Spain                            | 21%                                    | 10%                                    | 62%                                    | 8%                                      |
| Sri Lanka                        | 26%                                    | 24%                                    | 22%                                    | 28%                                     |
| Sudan                            | 18%                                    | 35%                                    | 30%                                    | 16%                                     |
| Suriname                         | 24%                                    | 29%                                    | 28%                                    | 19%                                     |
| Swaziland                        | 30%                                    | 36%                                    | 21%                                    | 14%                                     |

| <b>Location</b>      | <b>Liver Cancer Due To Alcohol Use</b> | <b>Liver Cancer Due To Hepatitis B</b> | <b>Liver Cancer Due To Hepatitis C</b> | <b>Liver Cancer Due To Other Causes</b> |
|----------------------|----------------------------------------|----------------------------------------|----------------------------------------|-----------------------------------------|
| Sweden               | 33%                                    | 17%                                    | 39%                                    | 10%                                     |
| Switzerland          | 39%                                    | 17%                                    | 36%                                    | 9%                                      |
| Syria                | 14%                                    | 32%                                    | 34%                                    | 19%                                     |
| Taiwan               | 27%                                    | 27%                                    | 27%                                    | 19%                                     |
| Tajikistan           | 10%                                    | 37%                                    | 38%                                    | 15%                                     |
| Tanzania             | 46%                                    | 21%                                    | 23%                                    | 10%                                     |
| Thailand             | 39%                                    | 29%                                    | 21%                                    | 11%                                     |
| The Bahamas          | 19%                                    | 30%                                    | 30%                                    | 21%                                     |
| The Gambia           | 14%                                    | 60%                                    | 9%                                     | 16%                                     |
| Timor-Leste          | 19%                                    | 28%                                    | 23%                                    | 30%                                     |
| Togo                 | 25%                                    | 47%                                    | 11%                                    | 17%                                     |
| Tonga                | 15%                                    | 37%                                    | 20%                                    | 28%                                     |
| Trinidad and Tobago  | 23%                                    | 27%                                    | 30%                                    | 20%                                     |
| Tunisia              | 18%                                    | 20%                                    | 44%                                    | 18%                                     |
| Turkey               | 19%                                    | 26%                                    | 44%                                    | 11%                                     |
| Turkmenistan         | 11%                                    | 38%                                    | 37%                                    | 15%                                     |
| Uganda               | 45%                                    | 23%                                    | 21%                                    | 10%                                     |
| Ukraine              | 47%                                    | 17%                                    | 27%                                    | 9%                                      |
| United Arab Emirates | 21%                                    | 44%                                    | 22%                                    | 13%                                     |
| United Kingdom       | 36%                                    | 17%                                    | 38%                                    | 9%                                      |
| United States        | 37%                                    | 9%                                     | 31%                                    | 22%                                     |
| Uruguay              | 39%                                    | 7%                                     | 41%                                    | 13%                                     |
| Uzbekistan           | 12%                                    | 37%                                    | 36%                                    | 15%                                     |
| Vanuatu              | 13%                                    | 39%                                    | 18%                                    | 29%                                     |
| Venezuela            | 35%                                    | 9%                                     | 41%                                    | 15%                                     |
| Vietnam              | 37%                                    | 28%                                    | 16%                                    | 19%                                     |
| Virgin Islands, U.S. | 36%                                    | 22%                                    | 27%                                    | 15%                                     |
| Wales                | 37%                                    | 17%                                    | 38%                                    | 9%                                      |
| Yemen                | 8%                                     | 44%                                    | 35%                                    | 12%                                     |
| Zambia               | 31%                                    | 25%                                    | 29%                                    | 14%                                     |
| Zimbabwe             | 30%                                    | 38%                                    | 15%                                    | 16%                                     |

444

445

eTable 11: Comparison between liver cancer deaths estimates for GBD and Globocan for the year 2012, both sexes combined

| Location                 | GBD Deaths 2012 | Lower 95% uncertainty interval | Upper 95% uncertainty interval | Globocan Deaths 2012 (green if between GBD 95% UI) | Difference between GBD and Globocan (%) |
|--------------------------|-----------------|--------------------------------|--------------------------------|----------------------------------------------------|-----------------------------------------|
| Global                   | 764,745         | 708,602                        | 810,269                        | 745,533                                            | 3%                                      |
| Afghanistan              | 1,496           | 713                            | 2,196                          | 723                                                | 107%                                    |
| Albania                  | 271             | 226                            | 395                            | 246                                                | 10%                                     |
| Algeria                  | 678             | 521                            | 795                            | 409                                                | 66%                                     |
| Angola                   | 1,637           | 574                            | 4,399                          | 490                                                | 234%                                    |
| Argentina                | 2,085           | 1,925                          | 2,257                          | 2,012                                              | 4%                                      |
| Armenia                  | 341             | 274                            | 384                            | 440                                                | -23%                                    |
| Australia                | 1,253           | 1,130                          | 1,371                          | 1,538                                              | -19%                                    |
| Austria                  | 871             | 801                            | 941                            | 894                                                | -3%                                     |
| Azerbaijan               | 497             | 424                            | 647                            | 441                                                | 13%                                     |
| Bahrain                  | 19              | 16                             | 23                             | 22                                                 | -13%                                    |
| Bangladesh               | 2,964           | 2,038                          | 3,653                          | 2,877                                              | 3%                                      |
| Barbados                 | 18              | 16                             | 20                             | 11                                                 | 63%                                     |
| Belarus                  | 451             | 402                            | 514                            | 290                                                | 56%                                     |
| Belgium                  | 816             | 747                            | 889                            | 761                                                | 7%                                      |
| Belize                   | 17              | 15                             | 23                             | 15                                                 | 11%                                     |
| Benin                    | 966             | 487                            | 1,752                          | 686                                                | 41%                                     |
| Bhutan                   | 16              | 11                             | 22                             | 24                                                 | -33%                                    |
| Bolivia                  | 539             | 402                            | 667                            | 263                                                | 105%                                    |
| Bosnia and Herzegovina   | 384             | 264                            | 451                            | 477                                                | -20%                                    |
| Botswana                 | 124             | 33                             | 393                            | 73                                                 | 69%                                     |
| Brazil                   | 9,310           | 8,767                          | 10,909                         | 10,070                                             | -8%                                     |
| Brunei                   | 25              | 22                             | 31                             | 19                                                 | 30%                                     |
| Bulgaria                 | 904             | 833                            | 978                            | 858                                                | 5%                                      |
| Burkina Faso             | 1,316           | 765                            | 2,095                          | 1,219                                              | 8%                                      |
| Burundi                  | 484             | 279                            | 770                            | 254                                                | 91%                                     |
| Cambodia                 | 661             | 498                            | 783                            | 2,155                                              | -69%                                    |
| Cameroon                 | 3,054           | 1,632                          | 5,168                          | 716                                                | 327%                                    |
| Canada                   | 1,962           | 1,758                          | 2,153                          | 2,276                                              | -14%                                    |
| Cape Verde               | 39              | 32                             | 44                             | 56                                                 | -30%                                    |
| Central African Republic | 552             | 253                            | 918                            | 169                                                | 226%                                    |
| Chad                     | 1,070           | 497                            | 1,922                          | 426                                                | 151%                                    |
| Chile                    | 1,211           | 1,104                          | 1,321                          | 1,218                                              | -1%                                     |
| China                    | 380,337         | 352,544                        | 419,744                        | 383,203                                            | -1%                                     |
| Colombia                 | 1,855           | 1,711                          | 2,010                          | 1,728                                              | 7%                                      |

|                                  |        |        |        |        |      |
|----------------------------------|--------|--------|--------|--------|------|
| Comoros                          | 36     | 22     | 52     | 15     | 137% |
| Congo                            | 371    | 218    | 614    | 225    | 65%  |
| Costa Rica                       | 252    | 231    | 276    | 197    | 28%  |
| Cote d'Ivoire                    | 1,296  | 732    | 2,042  | 2,141  | -39% |
| Croatia                          | 477    | 429    | 518    | 447    | 7%   |
| Cuba                             | 820    | 754    | 900    | 804    | 2%   |
| Cyprus                           | 48     | 37     | 55     | 47     | 2%   |
| Czech Republic                   | 857    | 786    | 925    | 697    | 23%  |
| Democratic Republic of the Congo | 4,765  | 2,831  | 7,639  | 3,438  | 39%  |
| Denmark                          | 341    | 313    | 369    | 303    | 13%  |
| Djibouti                         | 58     | 25     | 114    | 18     | 220% |
| Dominican Republic               | 556    | 450    | 616    | 810    | -31% |
| Ecuador                          | 961    | 683    | 1,107  | 1,018  | -6%  |
| Egypt                            | 8,121  | 7,197  | 9,158  | 16,770 | -52% |
| El Salvador                      | 289    | 243    | 324    | 429    | -33% |
| Equatorial Guinea                | 69     | 28     | 194    | 20     | 243% |
| Eritrea                          | 264    | 120    | 493    | 77     | 243% |
| Estonia                          | 84     | 76     | 94     | 92     | -9%  |
| Ethiopia                         | 4,436  | 2,537  | 7,109  | 926    | 379% |
| Fiji                             | 37     | 30     | 44     | 60     | -38% |
| Finland                          | 440    | 401    | 484    | 484    | -9%  |
| France                           | 9,553  | 8,645  | 10,434 | 8,050  | 19%  |
| Gabon                            | 158    | 91     | 274    | 28     | 465% |
| Georgia                          | 389    | 343    | 433    | 421    | -8%  |
| Germany                          | 7,920  | 7,256  | 8,621  | 7,725  | 3%   |
| Ghana                            | 2,160  | 1,200  | 3,562  | 1,856  | 16%  |
| Greece                           | 2,103  | 1,849  | 2,374  | 1,398  | 50%  |
| Guam                             | 20     | 16     | 23     | 13     | 52%  |
| Guatemala                        | 1,394  | 1,305  | 1,488  | 1,476  | -6%  |
| Guinea                           | 2,040  | 1,307  | 3,018  | 1,050  | 94%  |
| Guinea-Bissau                    | 226    | 72     | 647    | 124    | 82%  |
| Guyana                           | 30     | 26     | 41     | 32     | -6%  |
| Haiti                            | 516    | 343    | 664    | 436    | 18%  |
| Honduras                         | 219    | 172    | 281    | 572    | -62% |
| Hungary                          | 844    | 776    | 909    | 621    | 36%  |
| Iceland                          | 11     | 10     | 12     | 12     | -9%  |
| India                            | 32,726 | 30,216 | 37,726 | 26,763 | 22%  |
| Indonesia                        | 12,193 | 9,198  | 14,699 | 17,175 | -29% |
| Iran                             | 2,183  | 1,670  | 2,809  | 1,492  | 46%  |
| Iraq                             | 1,267  | 950    | 1,643  | 645    | 96%  |
| Ireland                          | 212    | 192    | 233    | 237    | -11% |
| Israel                           | 307    | 279    | 336    | 296    | 4%   |
| Italy                            | 11,061 | 9,982  | 12,212 | 9,198  | 20%  |

|             |        |        |        |        |      |
|-------------|--------|--------|--------|--------|------|
| Jamaica     | 118    | 98     | 170    | 130    | -10% |
| Japan       | 36,056 | 34,885 | 37,274 | 32,518 | 11%  |
| Jordan      | 80     | 69     | 96     | 154    | -48% |
| Kazakhstan  | 1,115  | 1,033  | 1,208  | 1,275  | -13% |
| Kenya       | 1,253  | 797    | 1,524  | 1,037  | 21%  |
| Kuwait      | 59     | 54     | 64     | 61     | -3%  |
| Kyrgyzstan  | 271    | 244    | 307    | 313    | -13% |
| Laos        | 311    | 218    | 395    | 2,022  | -85% |
| Latvia      | 128    | 115    | 140    | 135    | -5%  |
| Lebanon     | 149    | 109    | 201    | 109    | 37%  |
| Lesotho     | 125    | 73     | 190    | 79     | 59%  |
| Liberia     | 366    | 233    | 531    | 373    | -2%  |
| Libya       | 209    | 140    | 254    | 201    | 4%   |
| Lithuania   | 168    | 154    | 184    | 181    | -7%  |
| Luxembourg  | 39     | 35     | 42     | 66     | -41% |
| Macedonia   | 190    | 170    | 216    | 185    | 3%   |
| Madagascar  | 945    | 513    | 1,478  | 452    | 109% |
| Malawi      | 520    | 324    | 806    | 203    | 156% |
| Malaysia    | 1,514  | 1,307  | 1,828  | 1,750  | -13% |
| Maldives    | 5      | 4      | 6      | 6      | -12% |
| Mali        | 2,249  | 1,427  | 3,408  | 345    | 552% |
| Malta       | 18     | 16     | 20     | 22     | -18% |
| Mauritania  | 313    | 169    | 524    | 274    | 14%  |
| Mauritius   | 49     | 45     | 53     | 70     | -30% |
| Mexico      | 5,919  | 5,753  | 6,099  | 6,068  | -2%  |
| Moldova     | 403    | 374    | 435    | 503    | -20% |
| Mongolia    | 1,512  | 734    | 1,808  | 1,345  | 12%  |
| Montenegro  | 43     | 37     | 55     | 68     | -36% |
| Morocco     | 1,629  | 1,165  | 2,193  | 321    | 408% |
| Mozambique  | 2,432  | 1,318  | 3,718  | 606    | 301% |
| Myanmar     | 4,733  | 2,794  | 7,164  | 4,652  | 2%   |
| Namibia     | 22     | 13     | 35     | 27     | -17% |
| Nepal       | 569    | 395    | 741    | 177    | 221% |
| Netherlands | 807    | 748    | 870    | 678    | 19%  |
| New Zealand | 216    | 196    | 236    | 236    | -9%  |
| Nicaragua   | 283    | 257    | 340    | 418    | -32% |
| Niger       | 1,339  | 828    | 2,076  | 489    | 174% |
| Nigeria     | 8,628  | 4,535  | 15,029 | 11,663 | -26% |
| North Korea | 8,300  | 6,412  | 10,730 | 4,818  | 72%  |
| Norway      | 200    | 183    | 220    | 173    | 16%  |
| Oman        | 72     | 58     | 84     | 57     | 26%  |
| Pakistan    | 5,650  | 4,416  | 6,908  | 4,115  | 37%  |
| Palestine   | 115    | 91     | 150    | 70     | 64%  |

|                     |        |        |        |        |      |
|---------------------|--------|--------|--------|--------|------|
| Panama              | 149    | 128    | 198    | 170    | -12% |
| Papua New Guinea    | 384    | 217    | 609    | 521    | -26% |
| Paraguay            | 155    | 135    | 180    | 159    | -2%  |
| Peru                | 1,515  | 1,327  | 1,733  | 1,726  | -12% |
| Philippines         | 6,334  | 5,865  | 6,793  | 7,434  | -15% |
| Poland              | 2,002  | 1,862  | 2,155  | 2,068  | -3%  |
| Portugal            | 990    | 912    | 1,081  | 908    | 9%   |
| Puerto Rico         | 365    | 325    | 404    | 272    | 34%  |
| Qatar               | 38     | 22     | 48     | 47     | -20% |
| Romania             | 2,543  | 2,337  | 2,742  | 2,830  | -10% |
| Russia              | 9,423  | 8,748  | 10,165 | 8,521  | 11%  |
| Rwanda              | 445    | 258    | 735    | 694    | -36% |
| Samoa               | 9      | 6      | 16     | 4      | 125% |
| Saudi Arabia        | 680    | 482    | 772    | 680    | 0%   |
| Senegal             | 1,297  | 706    | 2,247  | 696    | 86%  |
| Serbia              | 824    | 701    | 910    | 852    | -3%  |
| Sierra Leone        | 596    | 382    | 838    | 513    | 16%  |
| Singapore           | 545    | 493    | 608    | 747    | -27% |
| Slovakia            | 370    | 331    | 417    | 347    | 7%   |
| Slovenia            | 166    | 147    | 183    | 189    | -12% |
| Solomon Islands     | 33     | 19     | 53     | 39     | -14% |
| Somalia             | 610    | 181    | 1,504  | 178    | 243% |
| South Africa        | 2,316  | 2,040  | 2,785  | 1,877  | 23%  |
| South Korea         | 13,404 | 12,437 | 14,415 | 12,275 | 9%   |
| South Sudan         | 628    | 209    | 1,819  | 359    | 75%  |
| Spain               | 5,004  | 4,577  | 5,469  | 4,536  | 10%  |
| Sri Lanka           | 517    | 449    | 585    | 771    | -33% |
| Sudan               | 1,316  | 784    | 2,038  | 887    | 48%  |
| Suriname            | 27     | 23     | 40     | 34     | -19% |
| Swaziland           | 68     | 31     | 114    | 71     | -5%  |
| Sweden              | 619    | 571    | 674    | 621    | 0%   |
| Switzerland         | 712    | 650    | 775    | 690    | 3%   |
| Syria               | 276    | 187    | 328    | 537    | -49% |
| Tajikistan          | 316    | 234    | 373    | 263    | 20%  |
| Tanzania            | 2,163  | 1,209  | 3,972  | 565    | 283% |
| Thailand            | 26,821 | 16,456 | 31,557 | 19,442 | 38%  |
| The Gambia          | 414    | 282    | 600    | 225    | 84%  |
| Timor-Leste         | 49     | 28     | 71     | 41     | 20%  |
| Togo                | 616    | 388    | 914    | 471    | 31%  |
| Trinidad and Tobago | 46     | 41     | 52     | 35     | 31%  |
| Tunisia             | 533    | 291    | 694    | 107    | 398% |
| Turkey              | 2,289  | 2,037  | 2,533  | 2,117  | 8%   |
| Turkmenistan        | 170    | 151    | 216    | 248    | -32% |

|                      |        |        |        |        |      |
|----------------------|--------|--------|--------|--------|------|
| Uganda               | 1,658  | 887    | 2,508  | 1,292  | 28%  |
| Ukraine              | 1,965  | 1,813  | 2,141  | 1,683  | 17%  |
| United Arab Emirates | 155    | 106    | 224    | 67     | 131% |
| United Kingdom       | 4,319  | 4,137  | 4,472  | 4,059  | 6%   |
| United States        | 22,252 | 21,480 | 23,030 | 24,312 | -8%  |
| Uruguay              | 133    | 120    | 146    | 99     | 34%  |
| Uzbekistan           | 927    | 808    | 1,167  | 1,041  | -11% |
| Vanuatu              | 15     | 10     | 24     | 26     | -41% |
| Venezuela            | 997    | 928    | 1,074  | 940    | 6%   |
| Vietnam              | 12,359 | 8,331  | 18,096 | 20,920 | -41% |
| Yemen                | 790    | 410    | 1,344  | 329    | 140% |
| Zambia               | 762    | 489    | 1,199  | 221    | 245% |
| Zimbabwe             | 1,231  | 770    | 1,777  | 520    | 137% |

447



| Country                             | Liver cancer incidence ranking | Liver cancer mortality ranking |
|-------------------------------------|--------------------------------|--------------------------------|
| Global                              | 6                              | 4                              |
| High SDI                            | 10                             | 6                              |
| High-middle SDI                     | 6                              | 2                              |
| Middle SDI                          | 4                              | 2                              |
| Low-middle SDI                      | 9                              | 4                              |
| Low SDI                             | 4                              | 1                              |
| <b>South Asia</b>                   | 14                             | 8                              |
| India                               | 14                             | 8                              |
| Pakistan                            | 13                             | 6                              |
| Bangladesh                          | 11                             | 9                              |
| Nepal                               | 11                             | 7                              |
| Bhutan                              | 11                             | 6                              |
| <b>East Asia</b>                    | 3                              | 2                              |
| China                               | 3                              | 2                              |
| North Korea                         | 3                              | 2                              |
| Taiwan                              | 3                              | 1                              |
| <b>Southeast Asia</b>               | 4                              | 2                              |
| Indonesia                           | 8                              | 2                              |
| Philippines                         | 7                              | 4                              |
| Vietnam                             | 5                              | 2                              |
| Thailand                            | 3                              | 1                              |
| Myanmar                             | 8                              | 6                              |
| Malaysia                            | 9                              | 4                              |
| Sri Lanka                           | 18                             | 10                             |
| Cambodia                            | 8                              | 5                              |
| Laos                                | 8                              | 5                              |
| Mauritius                           | 14                             | 7                              |
| Timor-Leste                         | 8                              | 2                              |
| Maldives                            | 11                             | 6                              |
| Seychelles                          | 20                             | 11                             |
| <b>North Africa and Middle East</b> | 10                             | 6                              |
| Egypt                               | 4                              | 1                              |
| Iran                                | 14                             | 9                              |
| Turkey                              | 14                             | 9                              |
| Sudan                               | 7                              | 4                              |
| Algeria                             | 15                             | 9                              |
| Iraq                                | 11                             | 5                              |
| Morocco                             | 10                             | 7                              |
| Afghanistan                         | 6                              | 4                              |
| Saudi Arabia                        | 7                              | 3                              |
| Yemen                               | 8                              | 4                              |
| Syria                               | 12                             | 9                              |
| Tunisia                             | 10                             | 6                              |
| United Arab Emirates                | 14                             | 7                              |
| Jordan                              | 20                             | 12                             |
| Libya                               | 12                             | 4                              |
| Lebanon                             | 18                             | 12                             |
| Palestine                           | 9                              | 6                              |
| Oman                                | 9                              | 3                              |
| Kuwait                              | 10                             | 5                              |
| Qatar                               | 8                              | 5                              |

| Country               | Liver cancer incidence ranking | Liver cancer mortality ranking |
|-----------------------|--------------------------------|--------------------------------|
| Bahrain               | 17                             | 7                              |
| <b>Western Europe</b> | 12                             | 8                              |
| Germany               | 13                             | 8                              |
| France                | 12                             | 6                              |
| United Kingdom        | 15                             | 12                             |
| Italy                 | 8                              | 6                              |
| England               | 15                             | 12                             |
| Spain                 | 9                              | 8                              |
| Netherlands           | 20                             | 14                             |
| Belgium               | 18                             | 10                             |
| Greece                | 6                              | 4                              |
| Portugal              | 12                             | 8                              |
| Sweden                | 15                             | 13                             |
| Austria               | 14                             | 8                              |
| Switzerland           | 11                             | 8                              |
| Israel                | 18                             | 11                             |
| Denmark               | 17                             | 14                             |
| Finland               | 14                             | 8                              |
| Scotland              | 15                             | 12                             |
| Norway                | 20                             | 15                             |
| Ireland               | 18                             | 12                             |
| Wales                 | 15                             | 12                             |
| Northern Ireland      | 15                             | 12                             |
| Cyprus                | 14                             | 9                              |
| Luxembourg            | 14                             | 8                              |
| Malta                 | 18                             | 14                             |
| Iceland               | 17                             | 15                             |
| Andorra               | 17                             | 11                             |
| <b>Western SSA</b>    | 4                              | 1                              |
| Nigeria               | 5                              | 1                              |
| Ghana                 | 5                              | 1                              |
| Cameroon              | 2                              | 1                              |
| Cote d'Ivoire         | 5                              | 3                              |
| Niger                 | 4                              | 1                              |
| Burkina Faso          | 4                              | 1                              |
| Mali                  | 1                              | 1                              |
| Senegal               | 4                              | 1                              |
| Chad                  | 4                              | 1                              |
| Guinea                | 1                              | 1                              |
| Benin                 | 4                              | 1                              |
| Togo                  | 4                              | 1                              |
| Sierra Leone          | 4                              | 1                              |
| Liberia               | 4                              | 1                              |
| Mauritania            | 4                              | 1                              |
| The Gambia            | 1                              | 1                              |
| Guinea-Bissau         | 4                              | 1                              |
| Cape Verde            | 6                              | 4                              |
| Sao Tome and Principe | 20                             | 17                             |
| <b>Eastern SSA</b>    | 5                              | 2                              |
| Ethiopia              | 3                              | 2                              |
| Tanzania              | 4                              | 2                              |

| Country                          | Liver cancer incidence ranking | Liver cancer mortality ranking |
|----------------------------------|--------------------------------|--------------------------------|
| Kenya                            | 7                              | 3                              |
| Uganda                           | 7                              | 4                              |
| Mozambique                       | 3                              | 1                              |
| Madagascar                       | 3                              | 2                              |
| Malawi                           | 7                              | 3                              |
| Zambia                           | 8                              | 4                              |
| South Sudan                      | 4                              | 2                              |
| Rwanda                           | 5                              | 2                              |
| Burundi                          | 4                              | 2                              |
| Somalia                          | 4                              | 2                              |
| Eritrea                          | 4                              | 2                              |
| Djibouti                         | 5                              | 1                              |
| Comoros                          | 3                              | 2                              |
| <b>High-income North America</b> | 14                             | 8                              |
| United States                    | 13                             | 8                              |
| Canada                           | 17                             | 12                             |
| Greenland                        | 14                             | 7                              |
| <b>Central Latin America</b>     | 9                              | 6                              |
| Mexico                           | 9                              | 6                              |
| Colombia                         | 9                              | 7                              |
| Venezuela                        | 14                             | 9                              |
| Guatemala                        | 4                              | 2                              |
| Honduras                         | 12                             | 8                              |
| El Salvador                      | 10                             | 8                              |
| Nicaragua                        | 7                              | 3                              |
| Costa Rica                       | 11                             | 6                              |
| Panama                           | 13                             | 8                              |
| <b>Eastern Europe</b>            | 15                             | 8                              |
| Russia                           | 14                             | 7                              |
| Ukraine                          | 17                             | 14                             |
| Belarus                          | 21                             | 17                             |
| Moldova                          | 6                              | 5                              |
| Lithuania                        | 15                             | 14                             |
| Latvia                           | 14                             | 12                             |
| Estonia                          | 14                             | 12                             |
| <b>Tropical Latin America</b>    | 16                             | 8                              |
| Brazil                           | 16                             | 8                              |
| Paraguay                         | 19                             | 10                             |
| <b>High-income Asia Pacific</b>  | 6                              | 4                              |
| Japan                            | 6                              | 4                              |
| South Korea                      | 4                              | 2                              |
| Singapore                        | 5                              | 3                              |
| Brunei                           | 8                              | 3                              |
| <b>Central Europe</b>            | 15                             | 7                              |
| Poland                           | 20                             | 14                             |
| Romania                          | 6                              | 6                              |
| Czech Republic                   | 14                             | 9                              |
| Hungary                          | 17                             | 11                             |
| Serbia                           | 13                             | 8                              |
| Bulgaria                         | 14                             | 7                              |
| Slovakia                         | 17                             | 9                              |

| Country                            | Liver cancer incidence ranking | Liver cancer mortality ranking |
|------------------------------------|--------------------------------|--------------------------------|
| Croatia                            | 10                             | 7                              |
| Bosnia and Herzegovina             | 6                              | 6                              |
| Albania                            | 6                              | 4                              |
| Macedonia                          | 9                              | 6                              |
| Slovenia                           | 13                             | 8                              |
| Montenegro                         | 12                             | 8                              |
| <b>Central SSA</b>                 | <b>3</b>                       | <b>1</b>                       |
| Democratic Republic of Congo       | 4                              | 1                              |
| Angola                             | 3                              | 1                              |
| Central African Republic           | 4                              | 1                              |
| Congo                              | 3                              | 1                              |
| Gabon                              | 5                              | 1                              |
| Equatorial Guinea                  | 3                              | 1                              |
| Central Asia                       | 9                              | 3                              |
| Uzbekistan                         | 13                             | 7                              |
| Kazakhstan                         | 13                             | 6                              |
| Azerbaijan                         | 13                             | 6                              |
| Tajikistan                         | 4                              | 2                              |
| Kyrgyzstan                         | 7                              | 3                              |
| Turkmenistan                       | 14                             | 6                              |
| Georgia                            | 13                             | 5                              |
| Armenia                            | 10                             | 6                              |
| Mongolia                           | 1                              | 1                              |
| <b>Southern Sub-Saharan Africa</b> | <b>9</b>                       | <b>7</b>                       |
| South Africa                       | 14                             | 7                              |
| Zimbabwe                           | 5                              | 2                              |
| Namibia                            | 16                             | 10                             |
| Botswana                           | 10                             | 5                              |
| Lesotho                            | 9                              | 6                              |
| Swaziland                          | 10                             | 5                              |
| <b>Southern Latin America</b>      | <b>17</b>                      | <b>11</b>                      |
| Argentina                          | 18                             | 12                             |
| Chile                              | 14                             | 8                              |
| Uruguay                            | 24                             | 18                             |
| <b>Andean Latin America</b>        | <b>10</b>                      | <b>6</b>                       |
| Peru                               | 9                              | 5                              |
| Ecuador                            | 10                             | 5                              |
| Bolivia                            | 10                             | 7                              |
| Caribbean                          | 11                             | 7                              |
| Cuba                               | 17                             | 7                              |
| Haiti                              | 9                              | 7                              |
| Dominican Republic                 | 8                              | 5                              |
| Puerto Rico                        | 9                              | 5                              |
| Jamaica                            | 13                             | 10                             |
| Trinidad and Tobago                | 15                             | 11                             |
| Guyana                             | 11                             | 7                              |
| Suriname                           | 9                              | 6                              |
| The Bahamas                        | 17                             | 7                              |
| Belize                             | 10                             | 6                              |
| Barbados                           | 18                             | 12                             |
| Saint Lucia                        | 18                             | 10                             |

| Country                                                                                                                                                                                                                                                                                             | Liver cancer incidence ranking | Liver cancer mortality ranking |
|-----------------------------------------------------------------------------------------------------------------------------------------------------------------------------------------------------------------------------------------------------------------------------------------------------|--------------------------------|--------------------------------|
| Saint Vincent and the Grenadines                                                                                                                                                                                                                                                                    | 17                             | 10                             |
| Grenada                                                                                                                                                                                                                                                                                             | 14                             | 10                             |
| Virgin Islands, U.S.                                                                                                                                                                                                                                                                                | 20                             | 12                             |
| Antigua and Barbuda                                                                                                                                                                                                                                                                                 | 16                             | 8                              |
| Dominica                                                                                                                                                                                                                                                                                            | 14                             | 9                              |
| Bermuda                                                                                                                                                                                                                                                                                             | 22                             | 13                             |
| <b>Australasia</b>                                                                                                                                                                                                                                                                                  | 15                             | 12                             |
| Australia                                                                                                                                                                                                                                                                                           | 16                             | 12                             |
| New Zealand                                                                                                                                                                                                                                                                                         | 14                             | 14                             |
| <b>Oceania</b>                                                                                                                                                                                                                                                                                      | 6                              | 4                              |
| Papua New Guinea                                                                                                                                                                                                                                                                                    | 6                              | 4                              |
| Fiji                                                                                                                                                                                                                                                                                                | 11                             | 6                              |
| Solomon Islands                                                                                                                                                                                                                                                                                     | 6                              | 4                              |
| Vanuatu                                                                                                                                                                                                                                                                                             | 7                              | 4                              |
| Samoa                                                                                                                                                                                                                                                                                               | 9                              | 3                              |
| Guam                                                                                                                                                                                                                                                                                                | 7                              | 3                              |
| Northern Mariana Islands                                                                                                                                                                                                                                                                            | 11                             | 3                              |
| Kiribati                                                                                                                                                                                                                                                                                            | 4                              | 2                              |
| Tonga                                                                                                                                                                                                                                                                                               | 3                              | 2                              |
| Federated States of Micronesia                                                                                                                                                                                                                                                                      | 9                              | 3                              |
| American Samoa                                                                                                                                                                                                                                                                                      | 7                              | 3                              |
| Marshall Islands                                                                                                                                                                                                                                                                                    | 8                              | 3                              |
| <p>Colors correspond to the ranking, with dark red as the most common cancer and dark green as the least common cancer for the location indicated. Rankings include 31 cancer groups.<sup>13</sup> The numbers inside each box indicate the ranking.<br/>Abbreviations: SSA: Sub-Saharan Africa</p> |                                |                                |

448  
449

*eFigure 4: Liver cancer ranking by total incidence and mortality based on global level, SDI quintiles, regions, and all countries, both sexes, 2015*

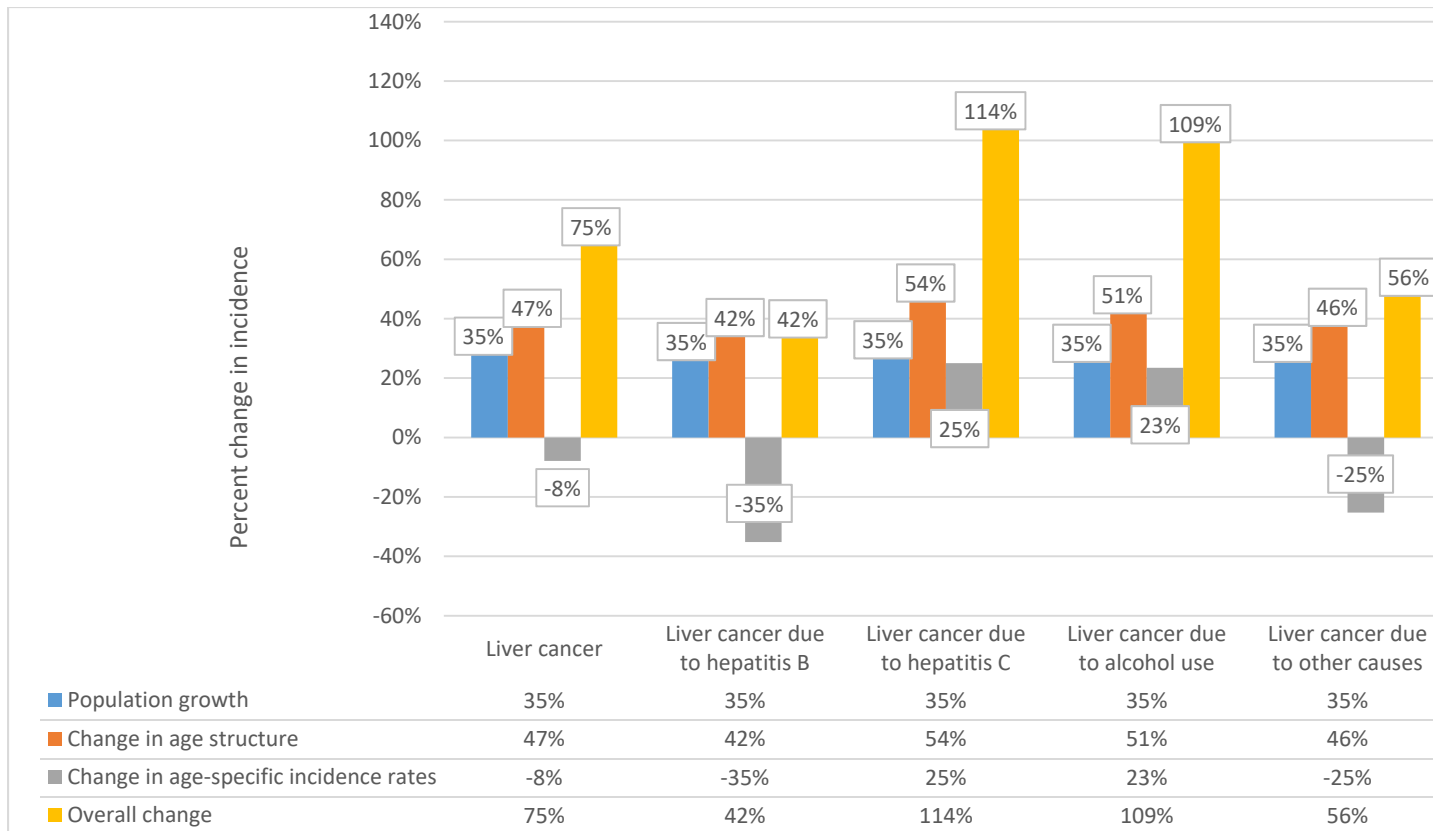

450

451

452

453

454

455

456

*eFigure 5: Decomposition of changes in liver cancer incident cases 1990 to 2015 by cause group, both sexes. Differences in incident cases between 1990 and 2015 can be explained by three factors: population growth, population age and sex structure, and age- and sex-specific rates. To determine how population growth contributed, two scenarios were calculated: in scenario (1) the 1990 rate, sex, and age structure was applied to the 2015 population. The difference between the 1990 incident cases and scenario (1) is only due to population growth. To estimate the effect of aging, the 1990 age-sex-specific rates were applied to the 2015 age-sex-specific population numbers for scenario (2). The difference between scenario (2) and scenario (1) is due to aging of the population. The contribution of a change in age-specific rates can be determined by taking the difference between 2015 numbers and scenario (2). The effects were calculated as the percent change in the number of cases for each factor compared to 1990.*

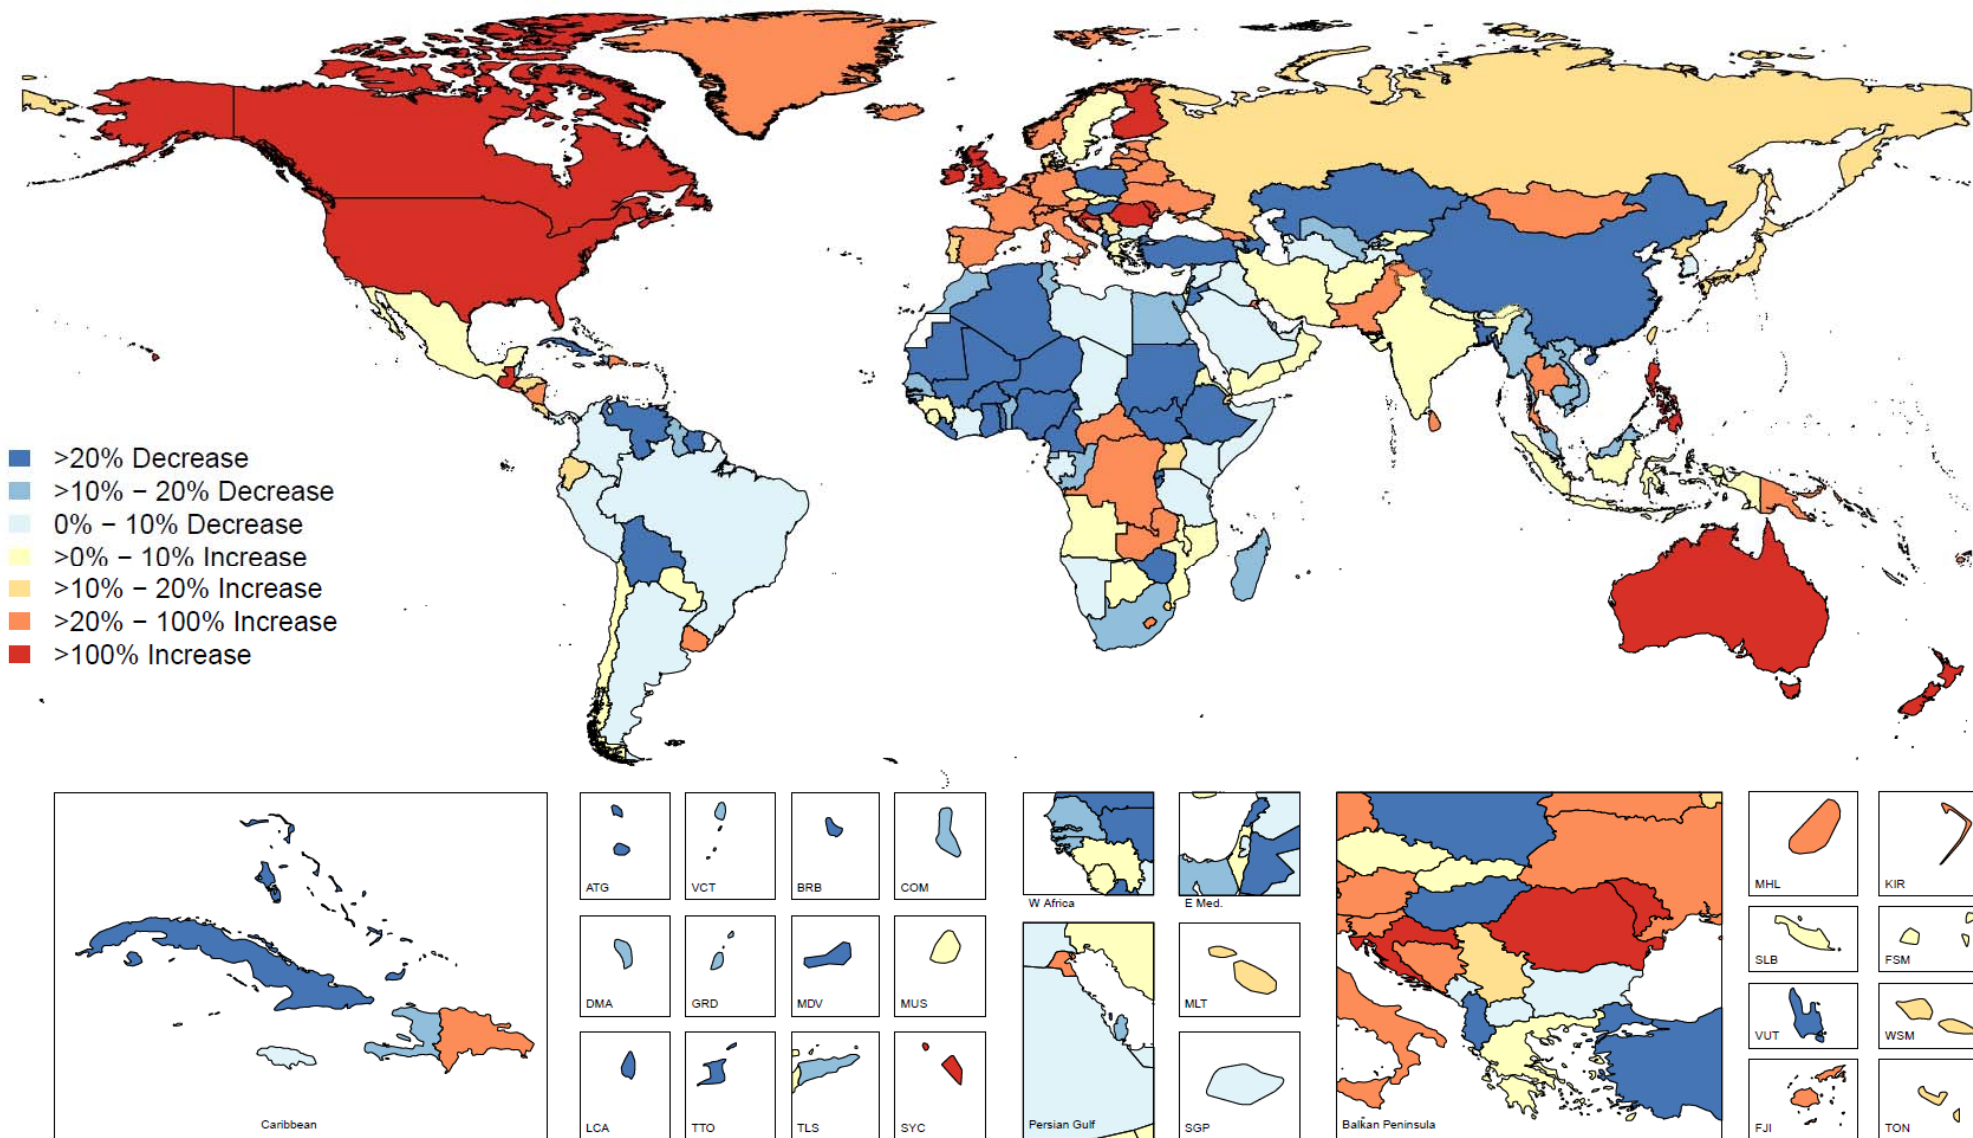

Figure 6: Relative changes in age-standardized liver cancer incidence between 1990 and 2015 for both sexes in 195 countries and territories
